# Supplementary material for: Alkane C–H activation and ligand exchange on silica supported d0 metal alkylidenes: relevance to alkane metathesis
Source: Royal Society of Chemistry journal article supplement (doi:10.1039/d2dt00434h), 2022-01-01
Supplement: d2dt00434h1.pdf [file d2dt00434h1.pdf]

# Electronic Supplementary Information

## Alkane C–H Activation and Ligand Exchange

### on Silica Supported $d^0$ Metal Alkylidenes:

### Relevance to Alkane Metathesis

Francisco Núñez-Zarur<sup>a,\*</sup>, Estefanía Díaz-Lopez<sup>b</sup>, Albeiro Restrepo<sup>c</sup>

<sup>a</sup>Facultad de Ciencias Básicas, Universidad de Medellín, Carrera 87 N° 30-65, 050026

Medellín, Colombia

<sup>b</sup>Departament de Química, Universitat Autònoma de Barcelona, 08193 Cerdanyola del

Vallès, Spain

<sup>c</sup>Instituto de Química, Universidad de Antioquia, Calle 70 N° 52-21, 050010 Medellín,

Colombia

## Table of Contents

|             |                                                                                                                                                                                                                                                                                                                                       |          |
|-------------|---------------------------------------------------------------------------------------------------------------------------------------------------------------------------------------------------------------------------------------------------------------------------------------------------------------------------------------|----------|
| <b>I.</b>   | DFT/BS1 optimized structures of the intermediates and transition states associated with the $\alpha$ -H abstraction, C-H addition, and $\sigma$ -bond metathesis pathways for the ligand exchange between propane and catalysts <b>1A-8A</b> .                                                                                        | S3-S19   |
| <b>II.</b>  | Electronic energy profiles for the ligand exchange between propane and catalysts <b>1A, 6A-8A</b> calculated at B3PW91/BS1 level of theory.                                                                                                                                                                                           | S20      |
| <b>III.</b> | Enthalpic energy profiles for the ligand exchange between propane and catalysts <b>1A, 6A-8A</b> calculated at B3PW91/BS1 level of theory.                                                                                                                                                                                            | S21      |
| <b>IV.</b>  | $\Delta G_{150}$ values and their $\Delta H$ and $T\Delta S_{\text{tot}}$ components of all stationary points associated with the $\alpha$ -H abstraction, C-H addition, and $\sigma$ -bond metathesis pathways for the ligand exchange between propane and catalysts <b>1A, 6A-8A</b> , calculated at the B3PW91-D3/BS1 level.       | S22      |
| <b>V.</b>   | $\Delta G_{150}$ values and their $\Delta H$ and $T\Delta S_{\text{tot}}$ components of all stationary points associated with the $\alpha$ -H abstraction, C-H addition, and $\sigma$ -bond metathesis pathways for the ligand exchange between propane and catalysts <b>1A, 6A-8A</b> , calculated at the $\omega$ B97xD /BS1 level. | S23      |
| <b>VI.</b>  | Cartesian coordinates of all intermediates and transition states associated with the ligand exchange between propane and silica supported metal alkylidenes <b>1A-8A</b> .                                                                                                                                                            | S24-S125 |

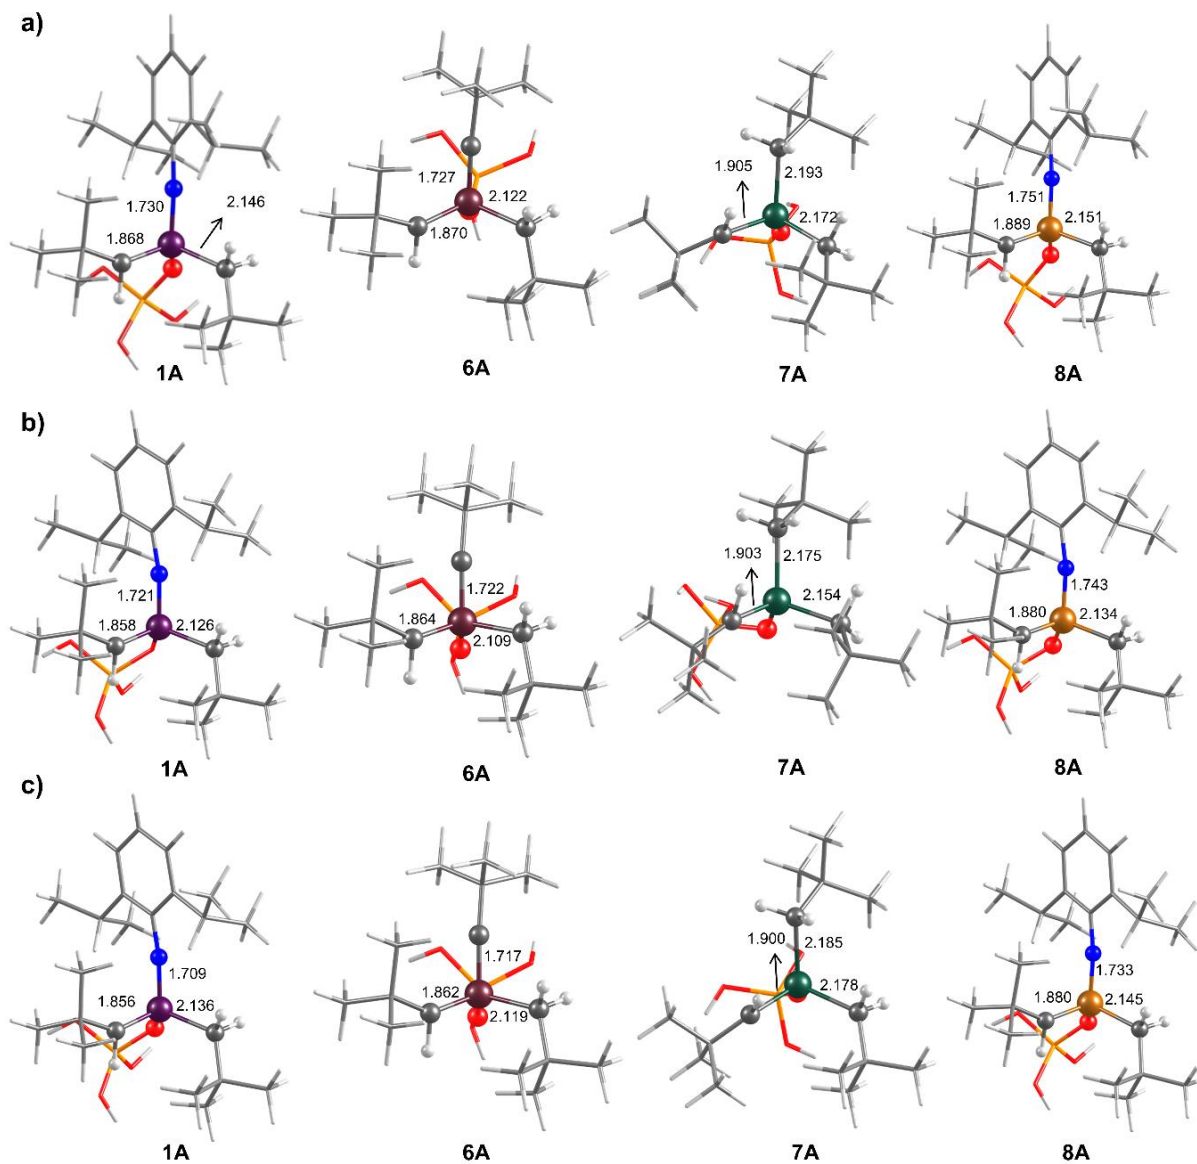

**Figure S1.** DFT/BS1 optimized structures of catalysts **1A**, **6A-8A** with functionals a) B3PW91; b) B3PW91-D3; c)  $\omega$ B97xD. Distances are given in Å.

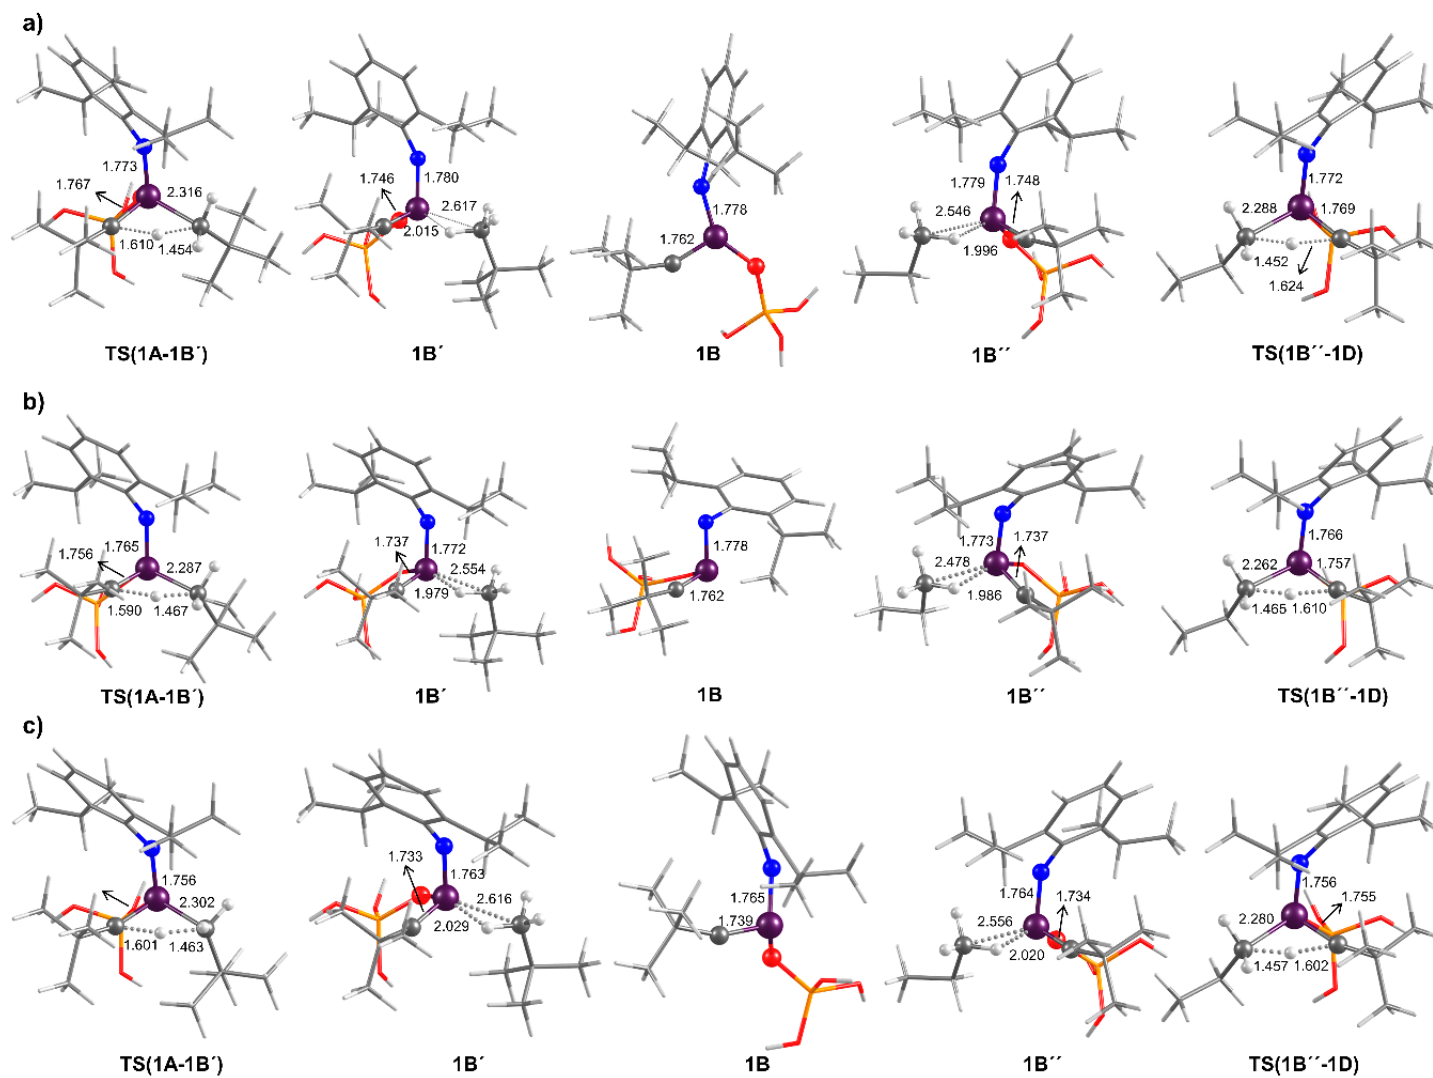

**Figure S2.** DFT/BS1 optimized structures of the minima and transition states involved in the  $\alpha$ -H abstraction mechanism of ligand exchange between propane and catalyst **1A** with functionals a) B3PW91; b) B3PW91-D3; c)  $\omega$ B97xD. Distances are given in Å.

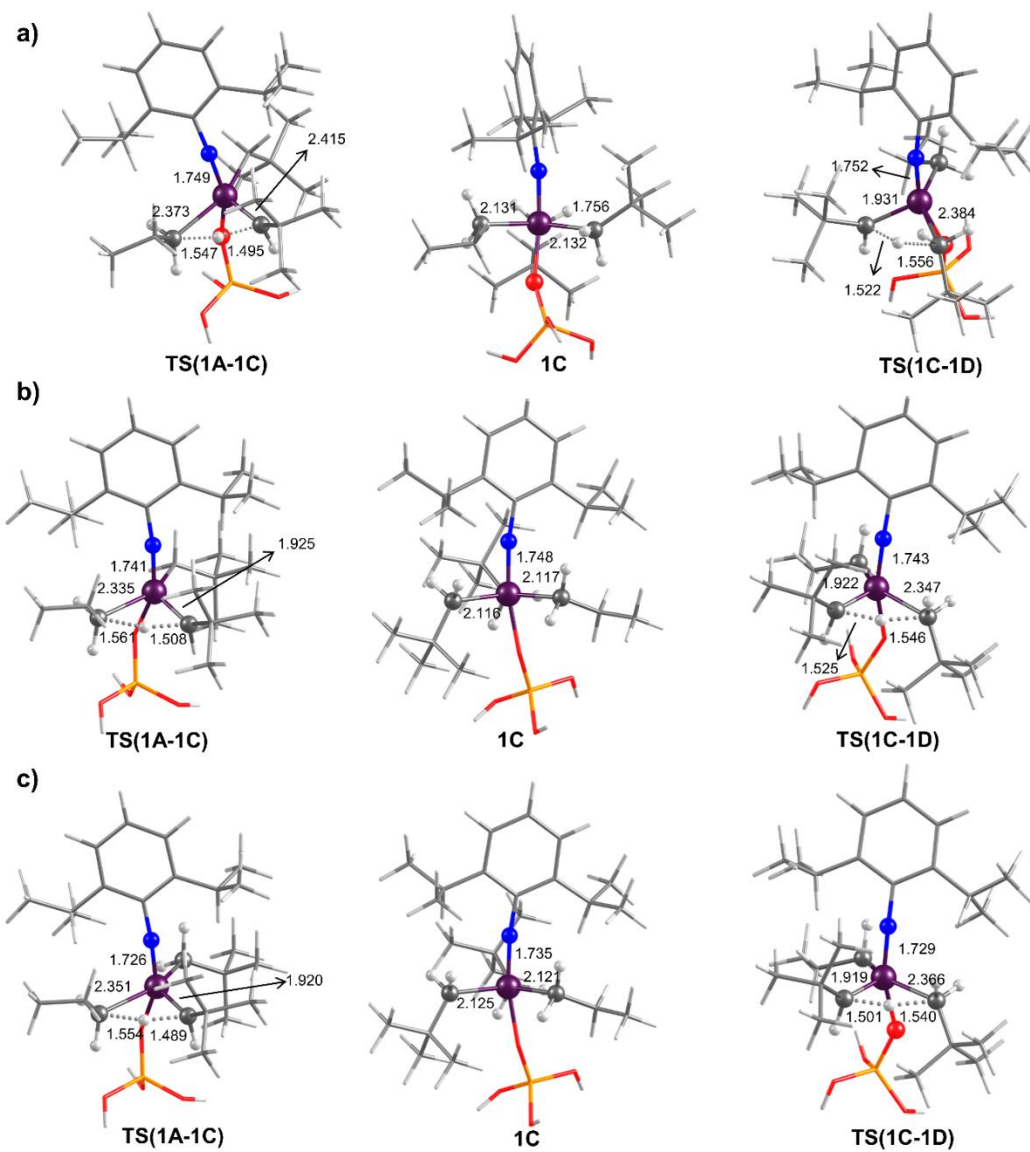

**Figure S3.** DFT/BS1 optimized structures of the minima and transition states involved in the C-H addition mechanism of ligand exchange between propane and catalyst **1A** with functionals a) B3PW91; b) B3PW91-D3; c)  $\omega$ B97xD. Distances are given in Å.

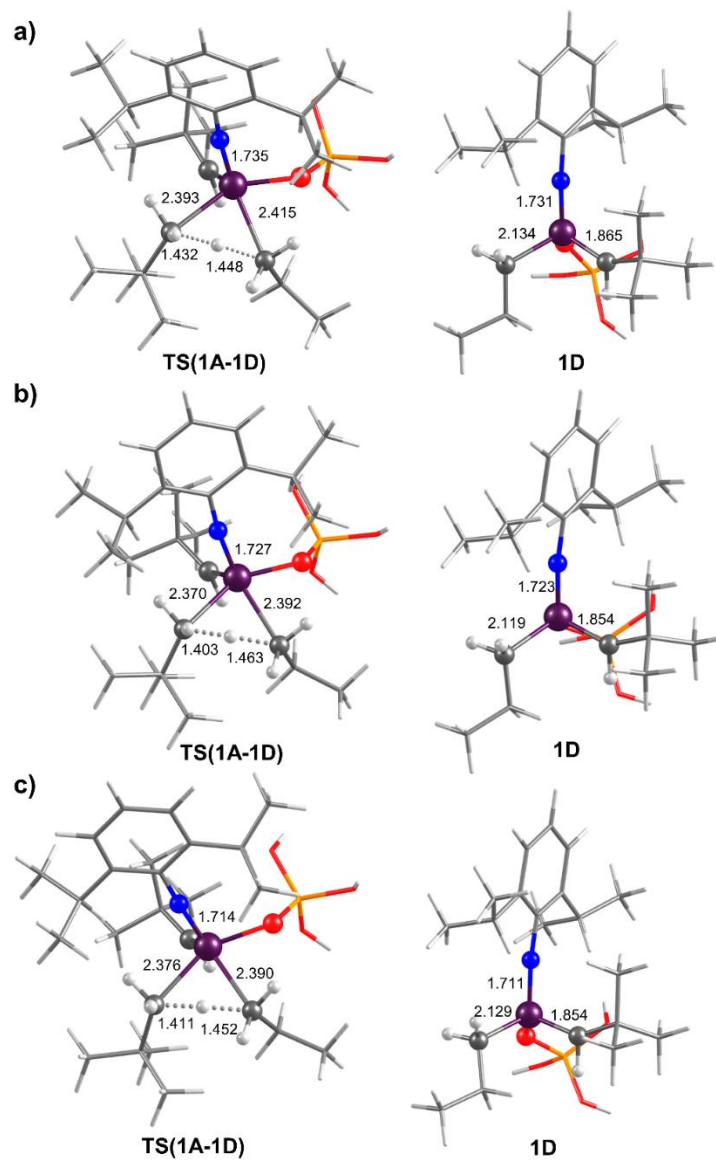

**Figure S4.** DFT/BS1 optimized structure of the transition state involved in the  $\sigma$ -bond metathesis mechanism of ligand exchange between propane and catalyst **1A** with functionals a) B3PW91; b) B3PW91-D3; c)  $\omega$ B97xD. The optimized structure of the product **1D** is also shown. Distances are given in Å.

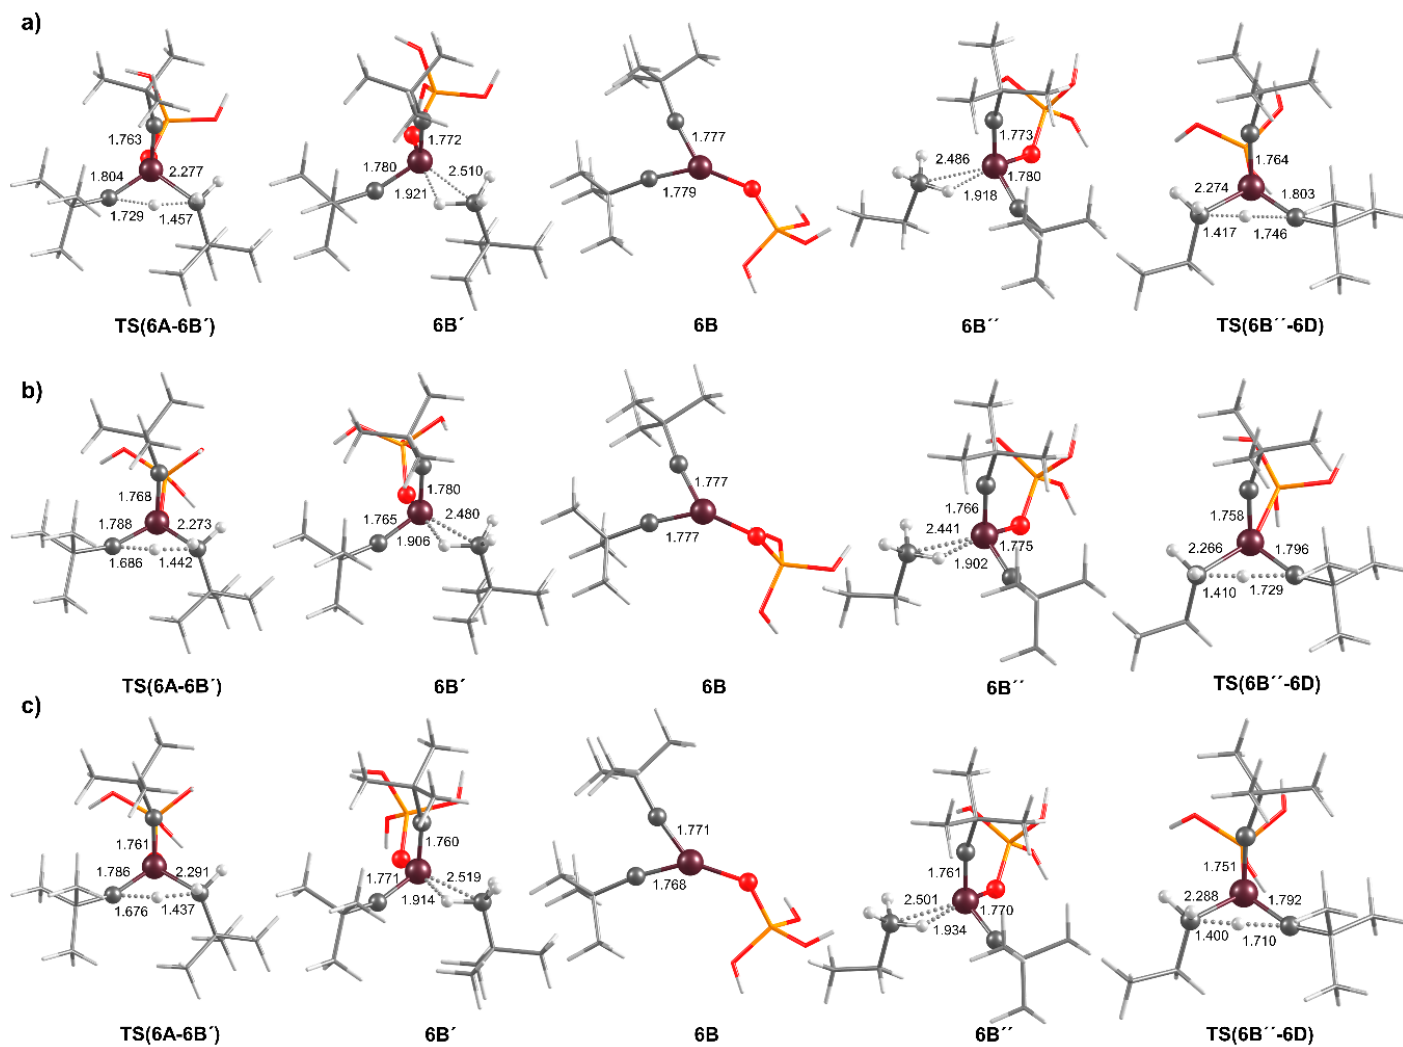

**Figure S5.** DFT/BS1 optimized structures of the minima and transition states involved in the  $\alpha$ -H abstraction mechanism of ligand exchange between propane and catalyst **6A** with functionals a) B3PW91; b) B3PW91-D3; c)  $\omega$ B97xD. Distances are given in Å.

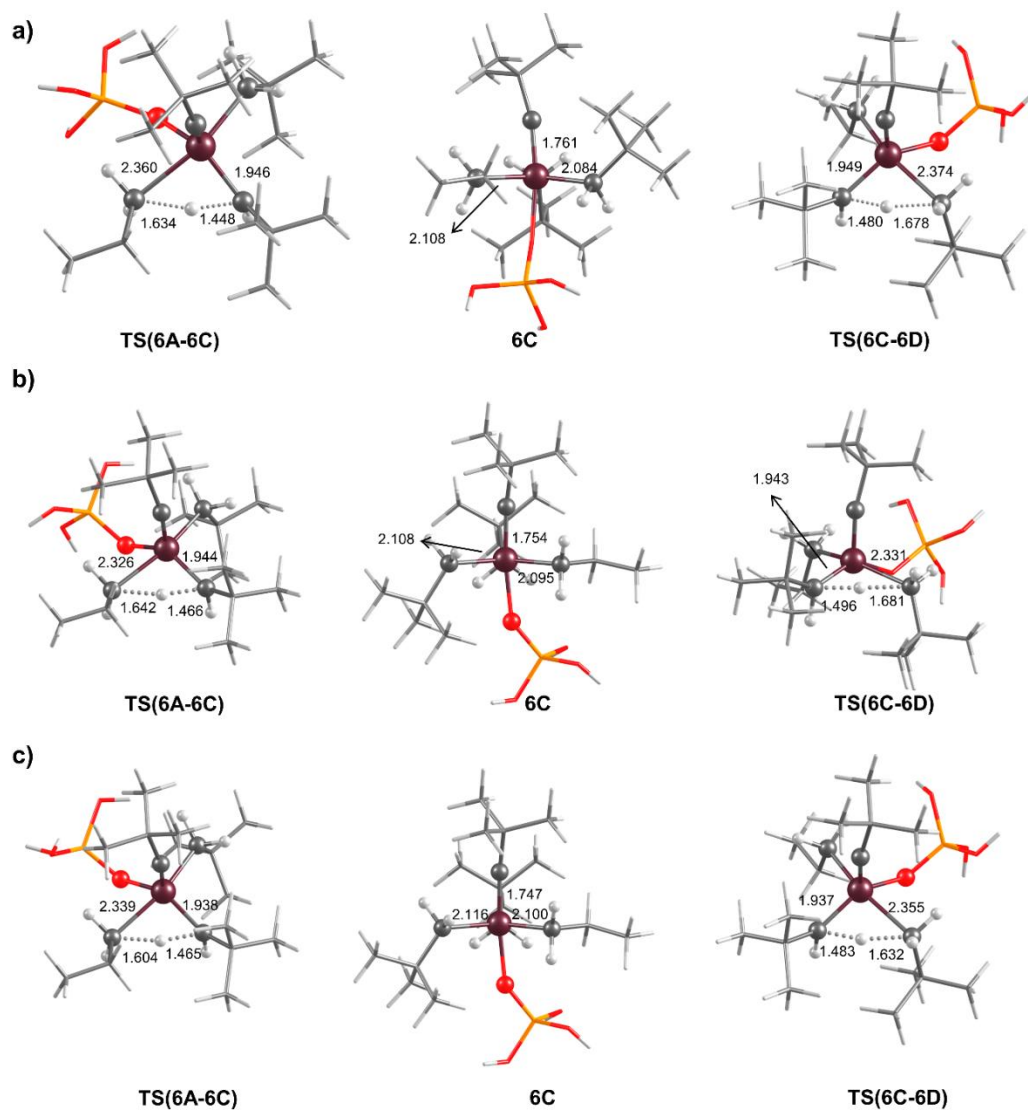

**Figure S6.** DFT/BS1 optimized structures of the minima and transition states involved in the C-H addition mechanism of ligand exchange between propane and catalyst **6A** with functionals a) B3PW91; b) B3PW91-D3; c)  $\omega$ B97xD. Distances are given in Å.



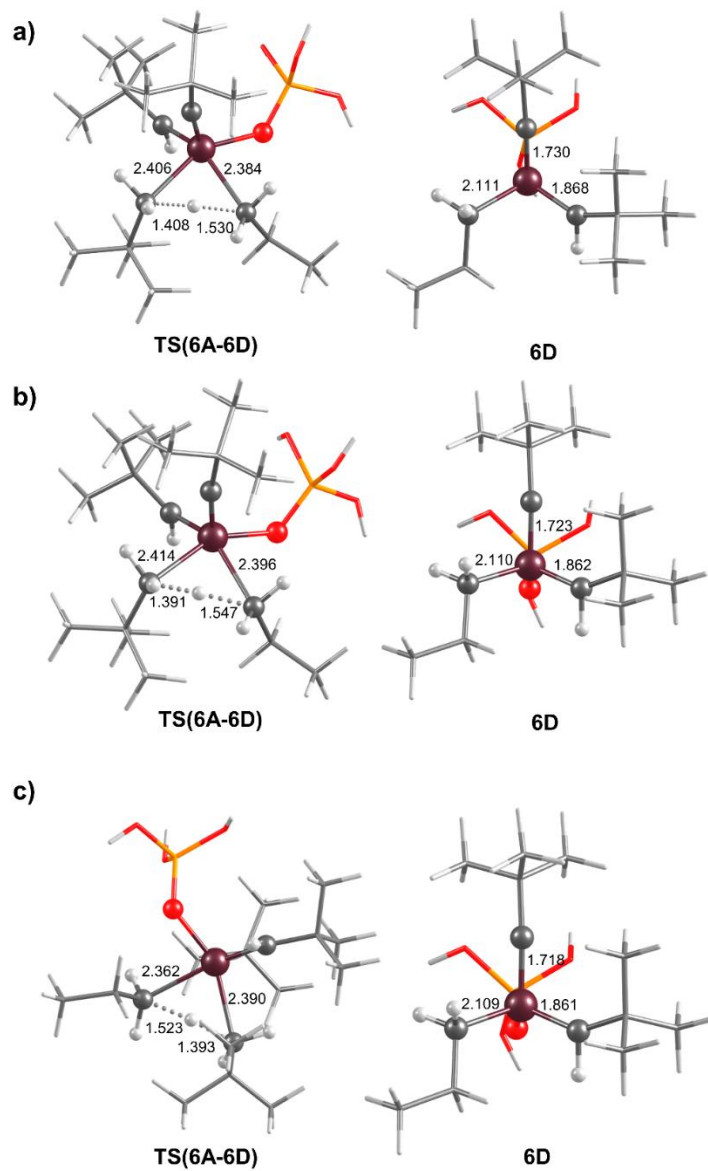

**Figure S7.** DFT/BS1 optimized structure of the transition state involved in the  $\sigma$ -bond metathesis mechanism of ligand exchange between propane and catalyst **6A** with functionals *a)* B3PW91; *b)* B3PW91-D3; *c)*  $\omega$ B97xD. The optimized structure of the product **6D** is also shown. Distances are given in Å.

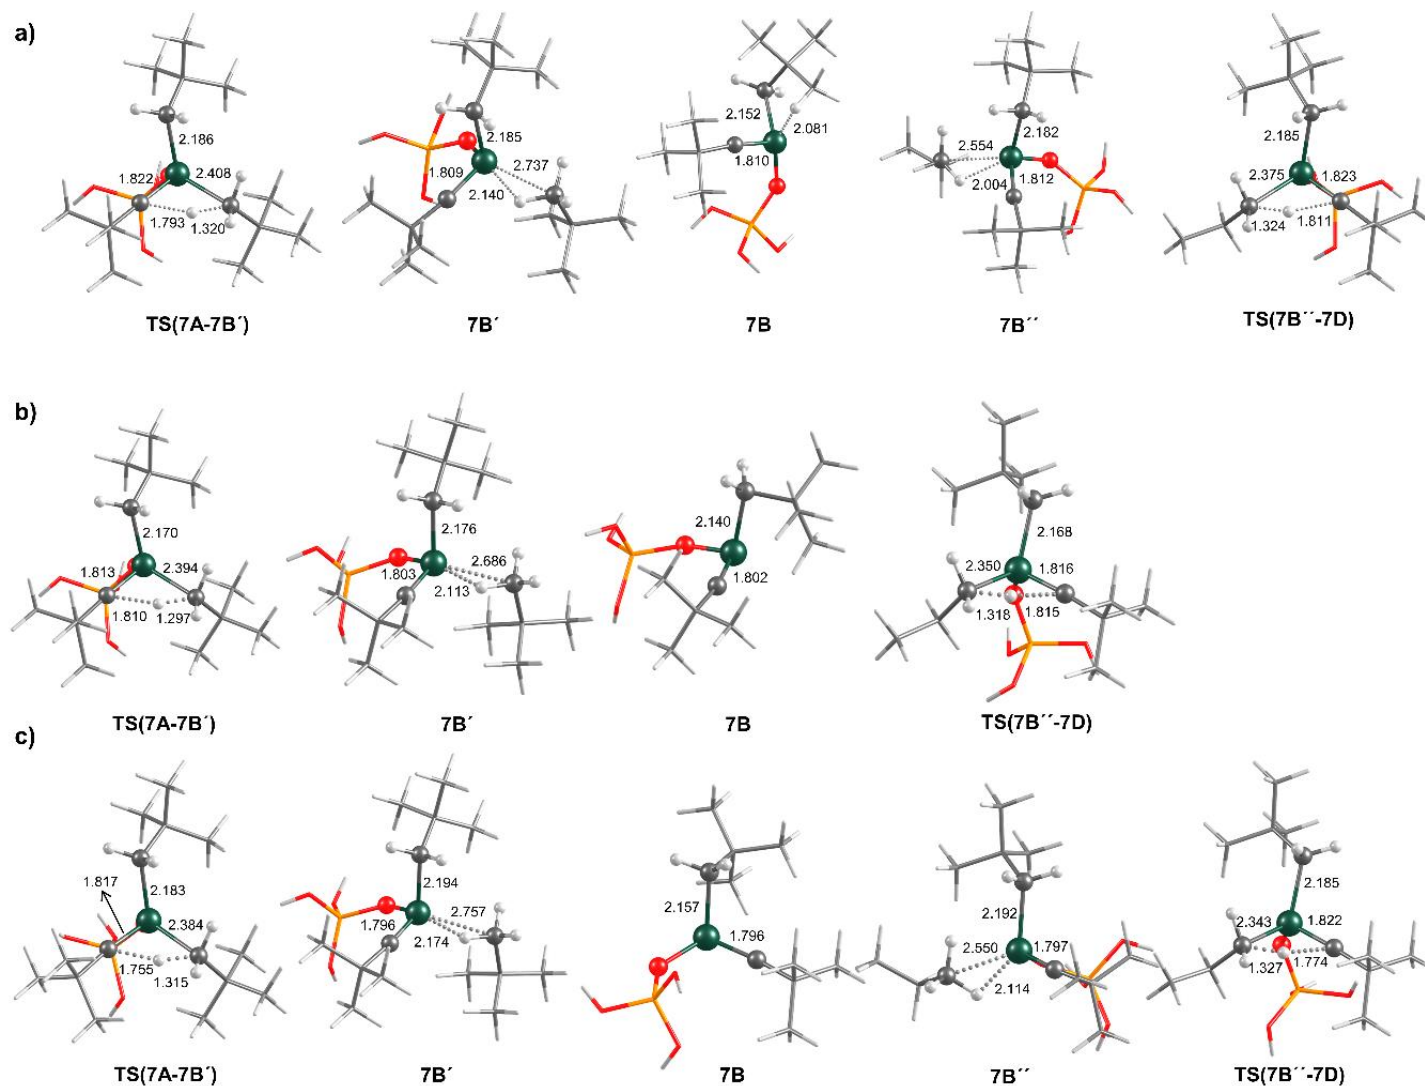

**Figure S8.** DFT/BS1 optimized structures of the minima and transition states involved in the  $\alpha$ -H abstraction mechanism of ligand exchange between propane and catalyst **7A** with functionals a) B3PW91; b) B3PW91-D3; c)  $\omega$ B97xD. Distances are given in Å.

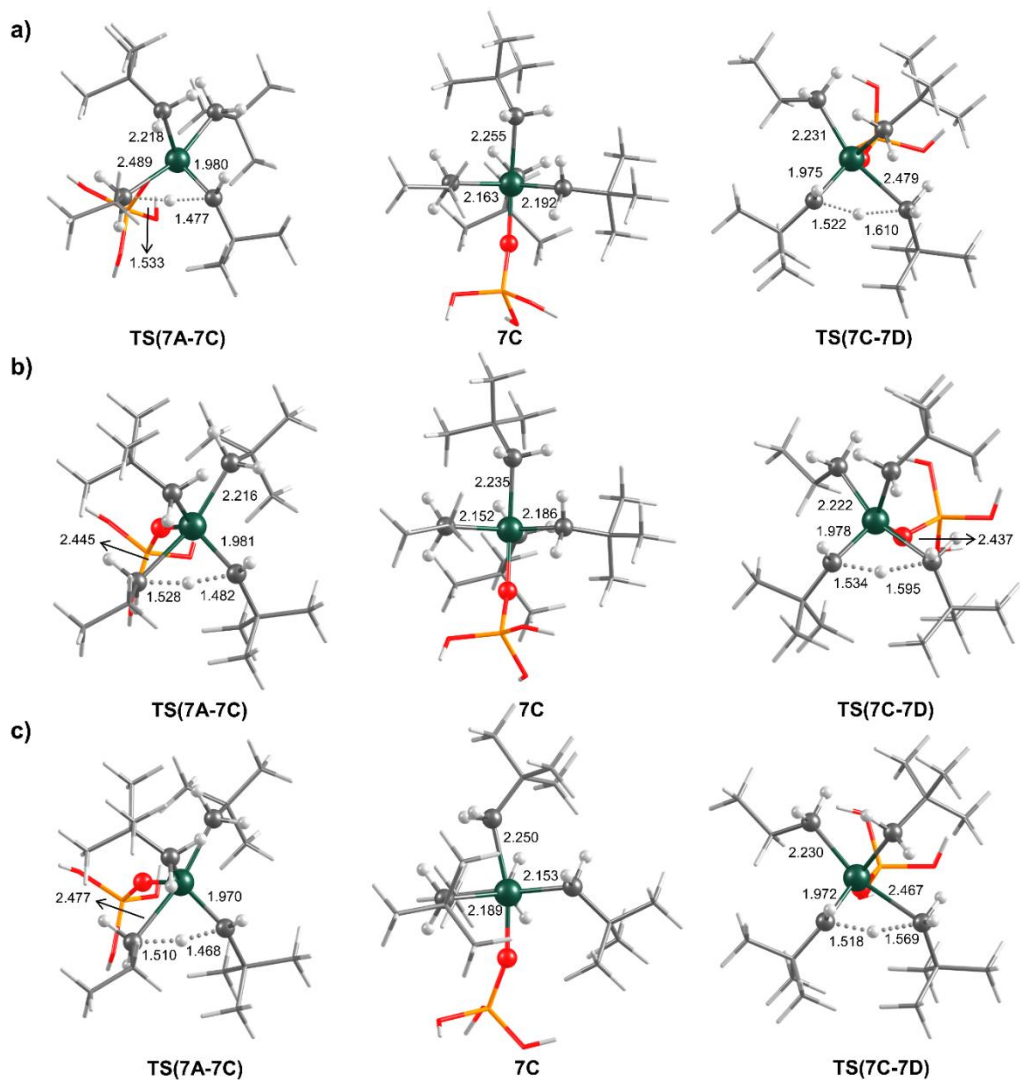

**Figure S9.** DFT/BS1 optimized structures of the minima and transition states involved in the C-H addition mechanism of ligand exchange between propane and catalyst **7A** with functionals a) B3PW91; b) B3PW91-D3; c)  $\omega$ B97xD. Distances are given in Å.

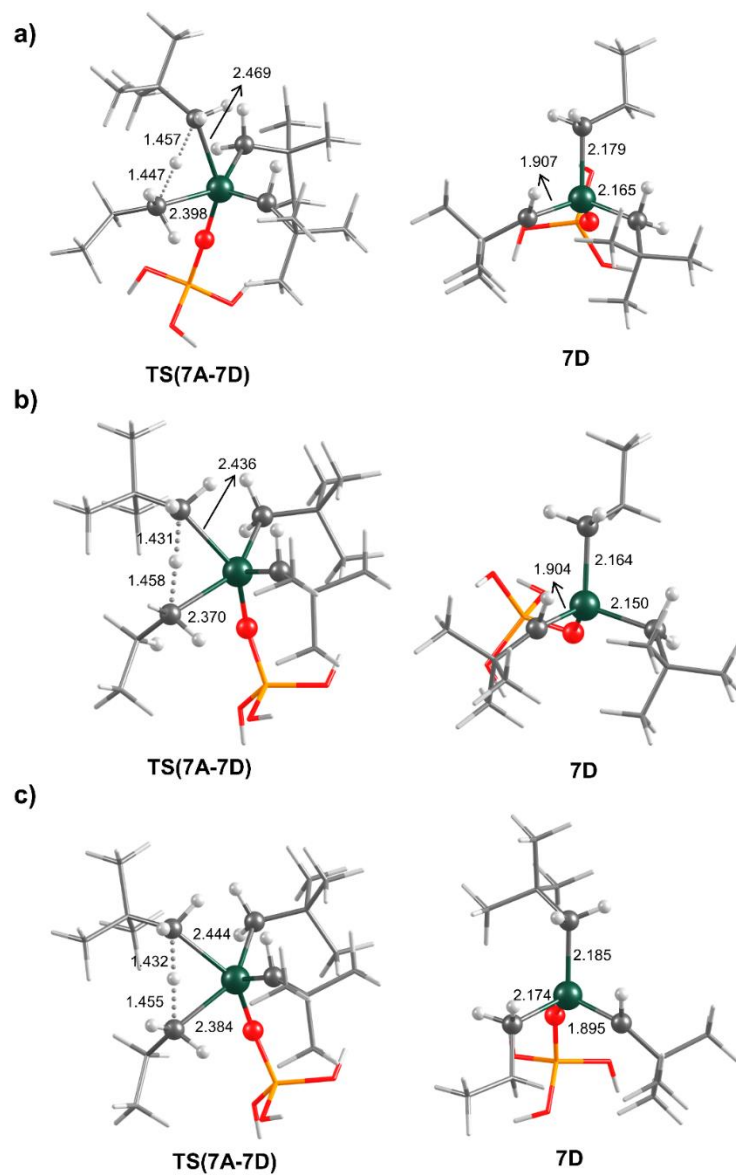

**Figure S10.** DFT/BS1 optimized structure of the transition state involved in the  $\sigma$ -bond metathesis mechanism of ligand exchange between propane and catalyst **7A** with functionals *a)* B3PW91; *b)* B3PW91-D3; *c)*  $\omega$ B97xD. The optimized structure of the product **7D** is also shown. Distances are given in Å.

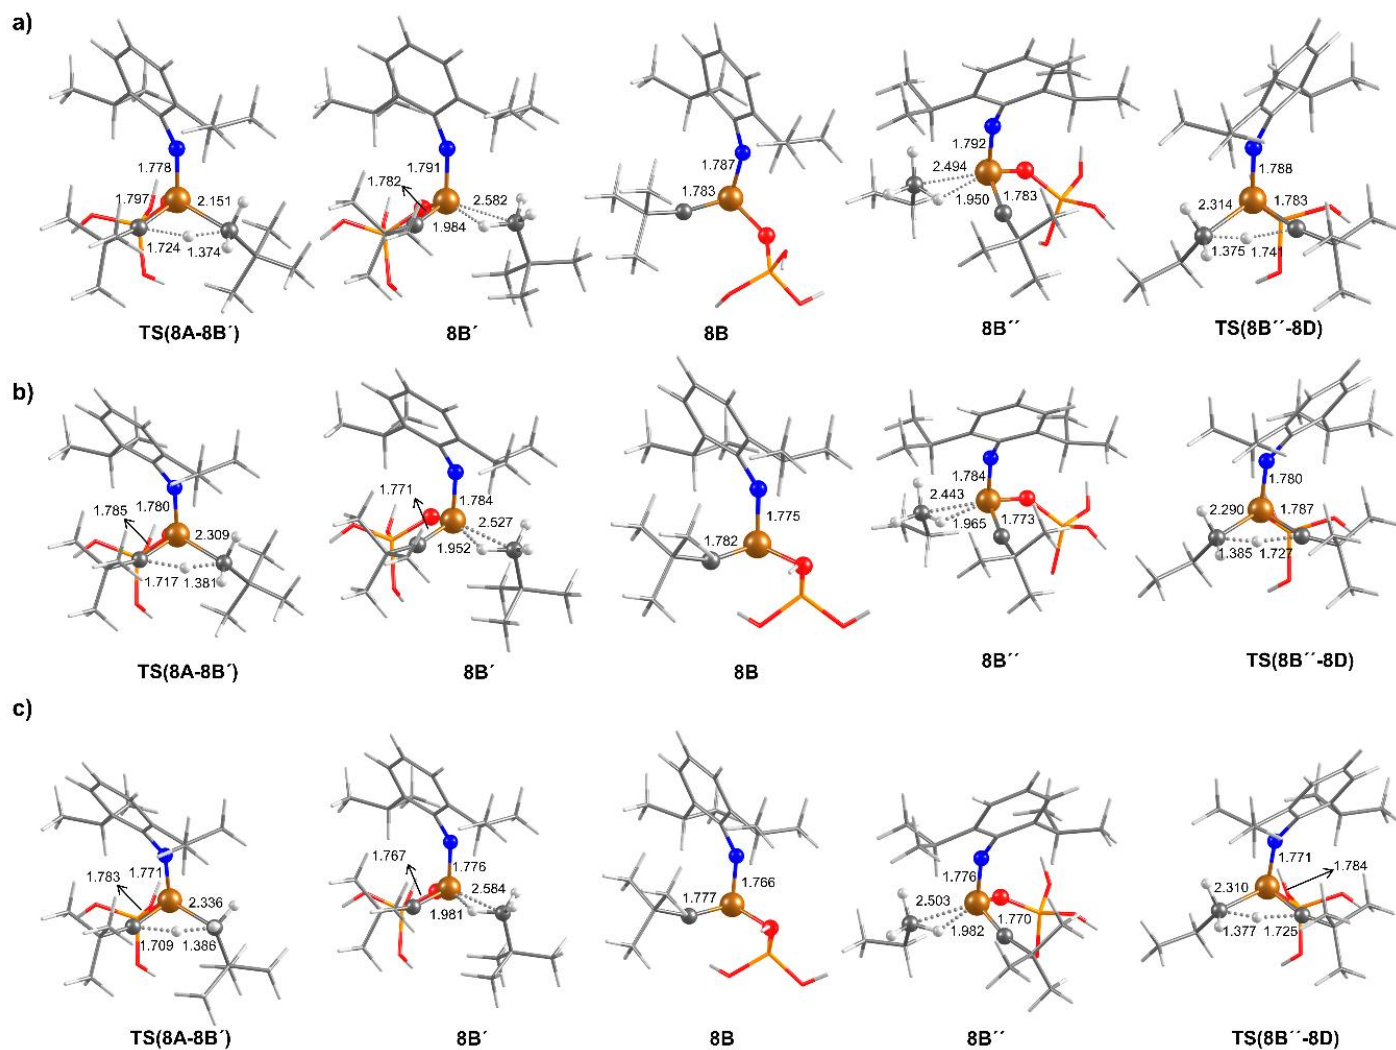

**Figure S11.** DFT/BS1 optimized structures of the minima and transition states involved in the  $\alpha$ -H abstraction mechanism of ligand exchange with catalyst **8A** between propane and functionals *a)* B3PW91; *b)* B3PW91-D3; *c)*  $\omega$ B97xD. Distances are given in Å.

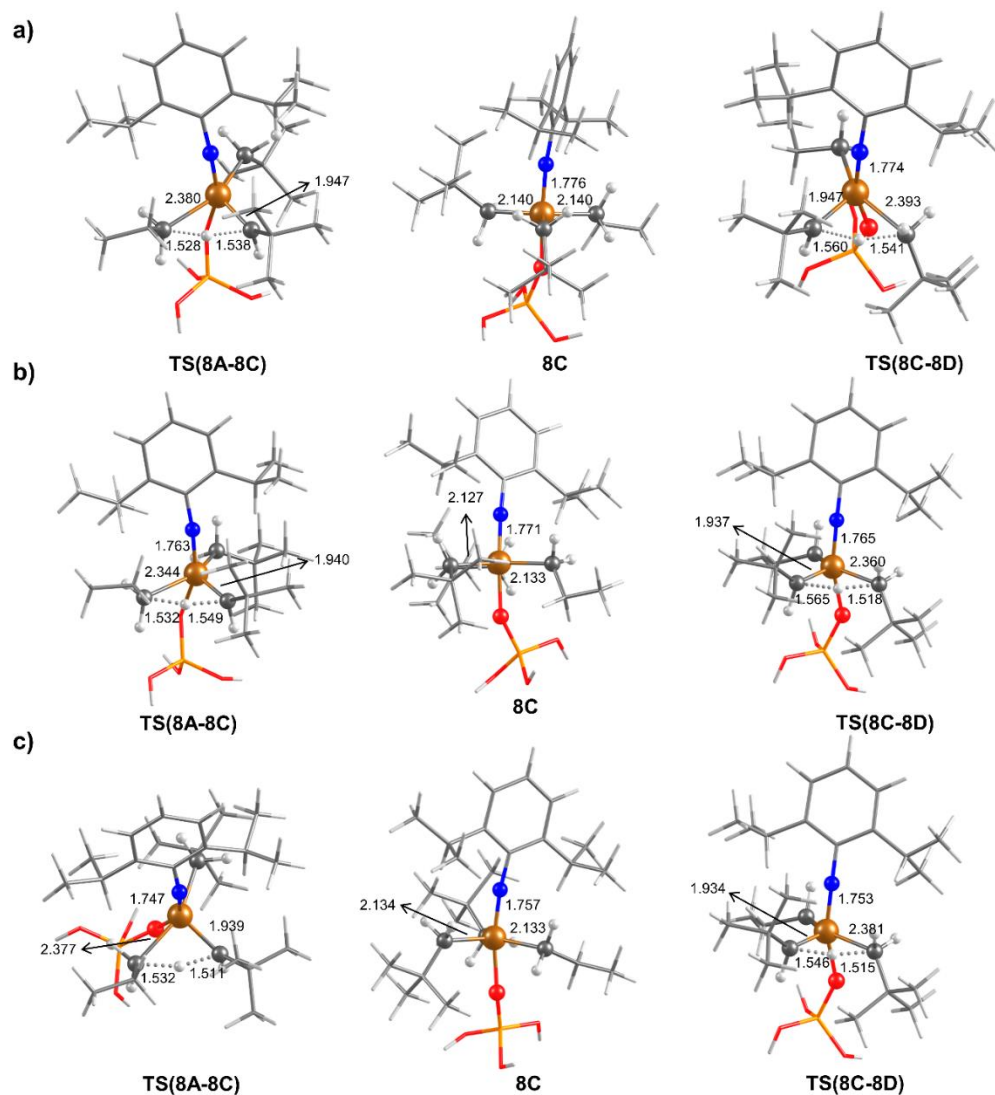

**Figure S12.** DFT/BS1 optimized structures of the minima and transition states involved in the C-H addition mechanism of ligand exchange with catalyst **8A** between propane and functionals *a)* B3PW91; *b)* B3PW91-D3; *c)*  $\omega$ B97xD. Distances are given in Å.

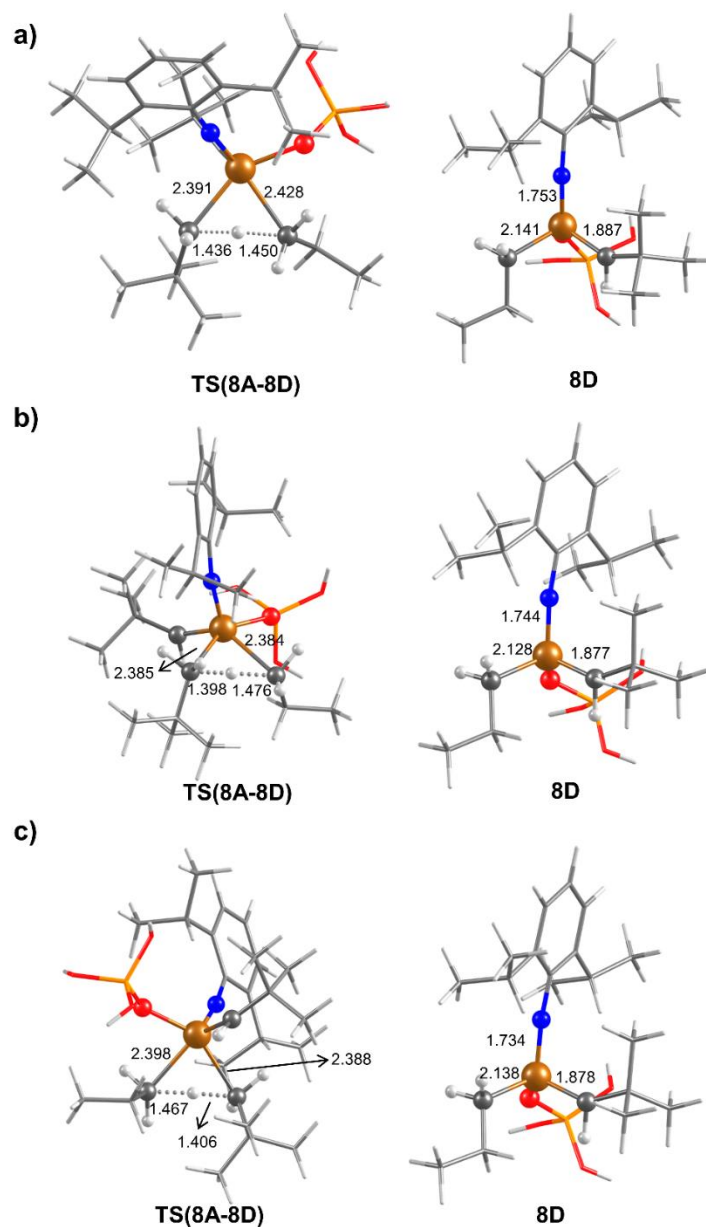

**Figure S13.** DFT/BS1 optimized structure of the transition state involved in the  $\sigma$ -bond metathesis mechanism of ligand exchange between propane and catalyst **8A** with functionals *a)* B3PW91; *b)* B3PW91-D3; *c)*  $\omega$ B97xD. The optimized structure of the product **8D** is also shown. Distances are given in Å.

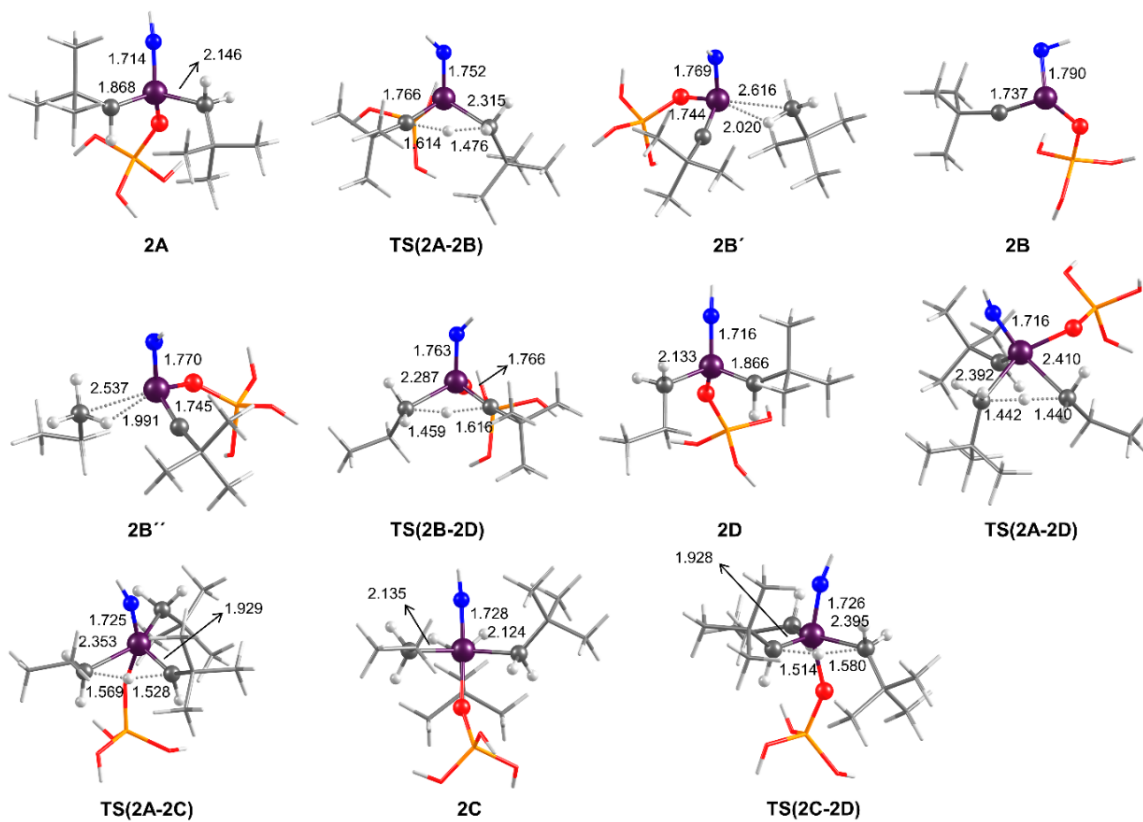

**Figure S14.** B3PW91/BS1 optimized structures of the minima and transition states involved in the three mechanisms of ligand exchange reaction between **2** and propane. Distances are given in Å.



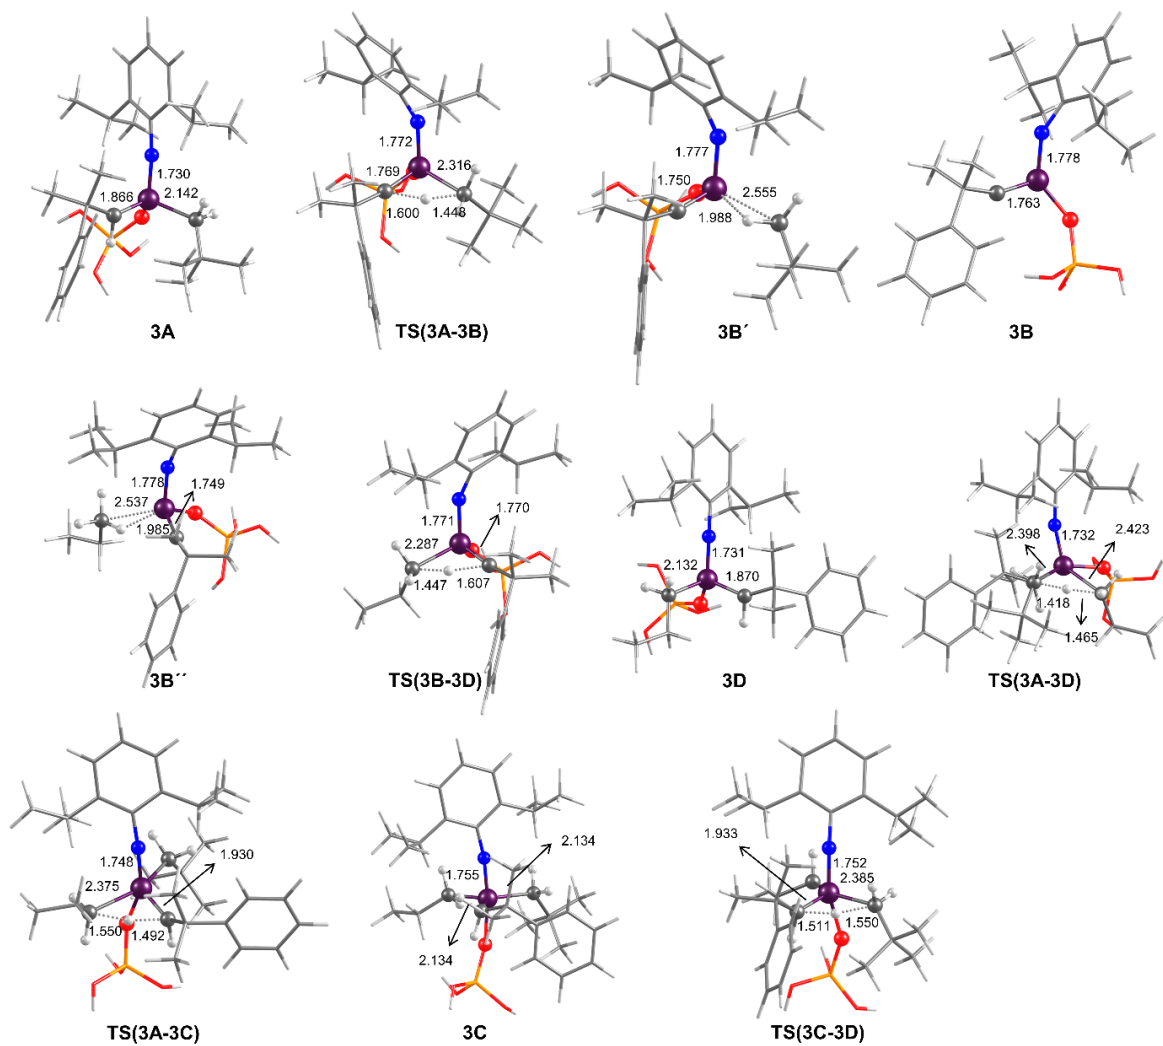

**Figure S15.** B3PW91/BS1 optimized structures of the minima and transition states involved in the three mechanisms of ligand exchange reaction between **3** and propane. Distances are given in Å.

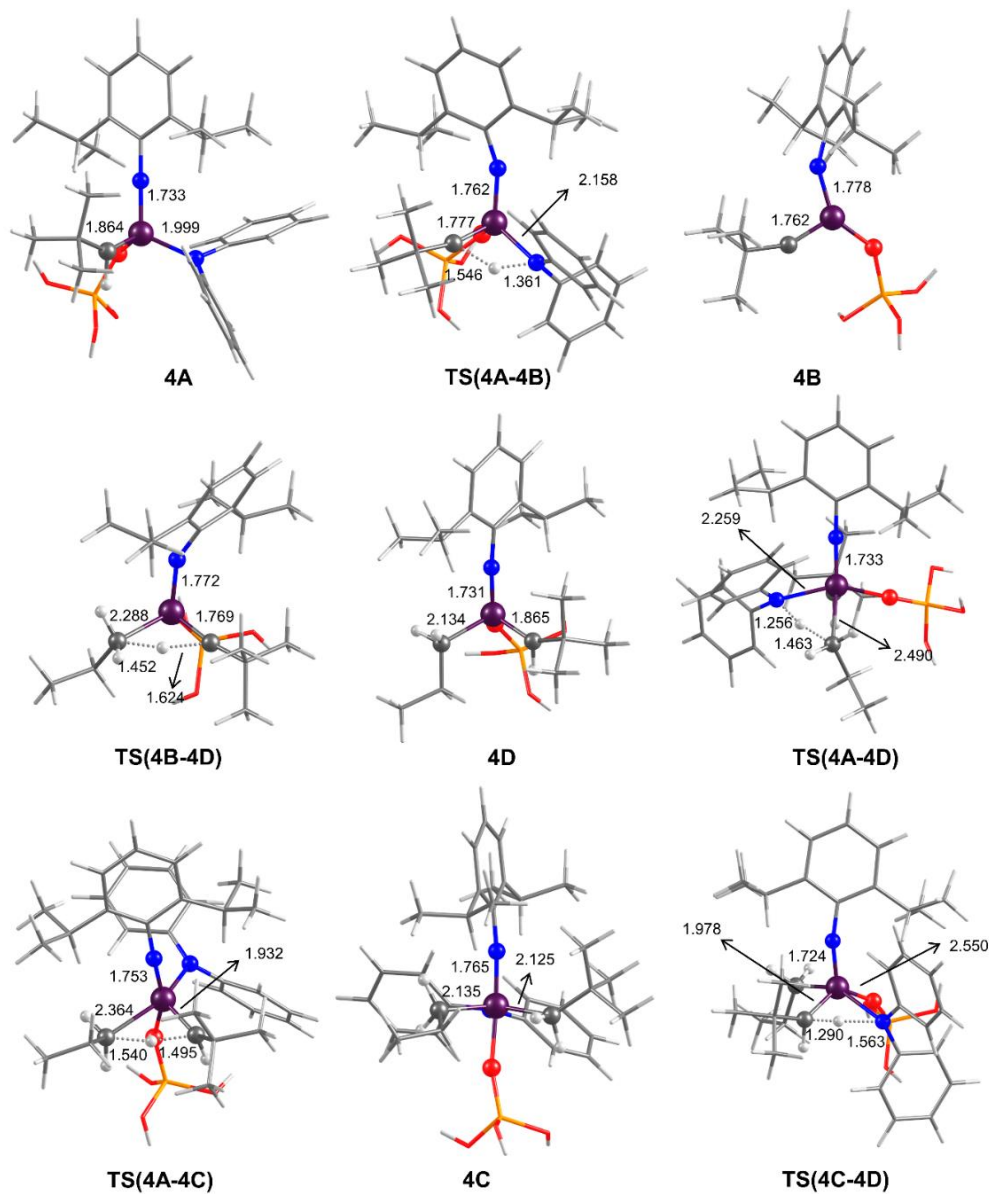

**Figure S16.** B3PW91/BS1 optimized structures of the minima and transition states involved in the three mechanisms of ligand exchange reaction between **4** and propane. Distances are given in Å.

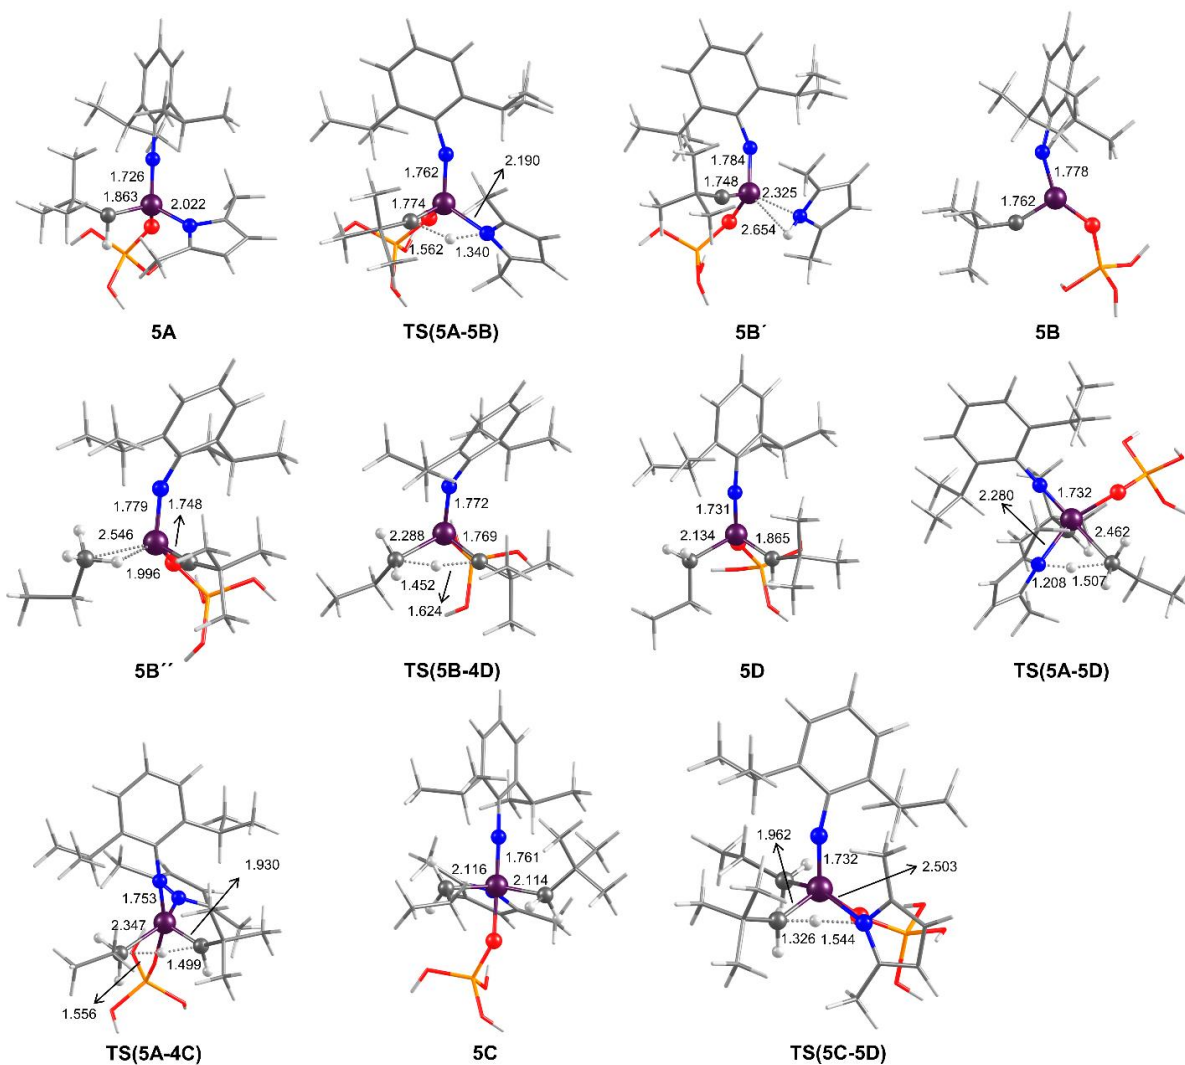

**Figure S17.** B3PW91/BS1 optimized structures of the minima and transition states involved in the three mechanisms of ligand exchange reaction between **5** and propane. Distances are given in Å.

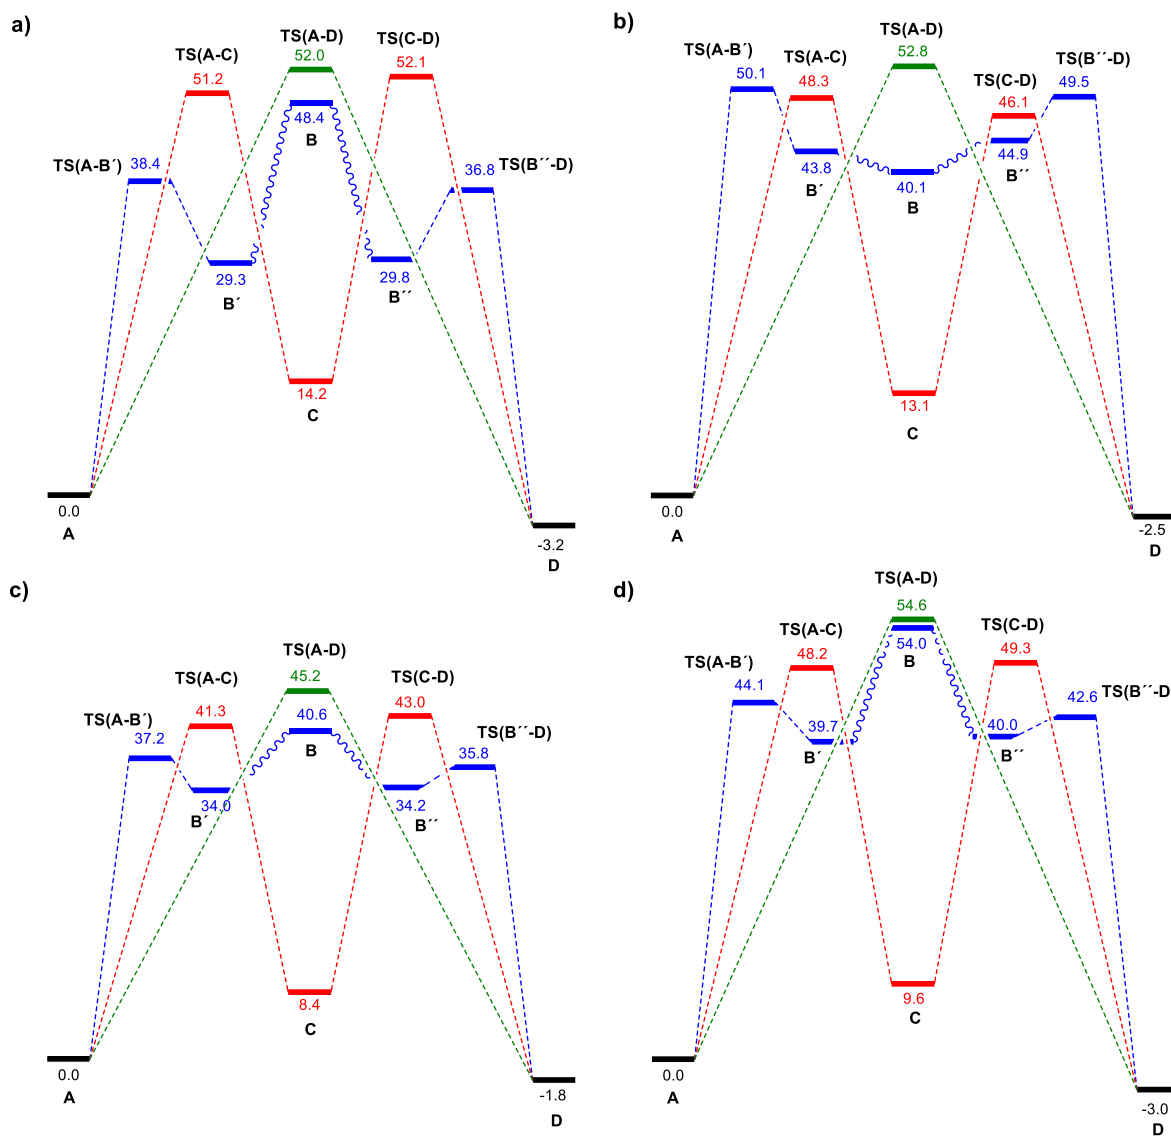

**Figure S18.** Electronic energy profiles (kcal mol<sup>-1</sup>) for the ligand exchange between propane and catalysts *a*) **1A**; *b*) **6A**; *c*) **7A**; *d*) **8A** calculated at the B3PW91/BS1 level of theory. The three pathways are color coded:  $\alpha$ -H abstraction in blue,  $\sigma$ -bond metathesis in green and C-H addition in red.

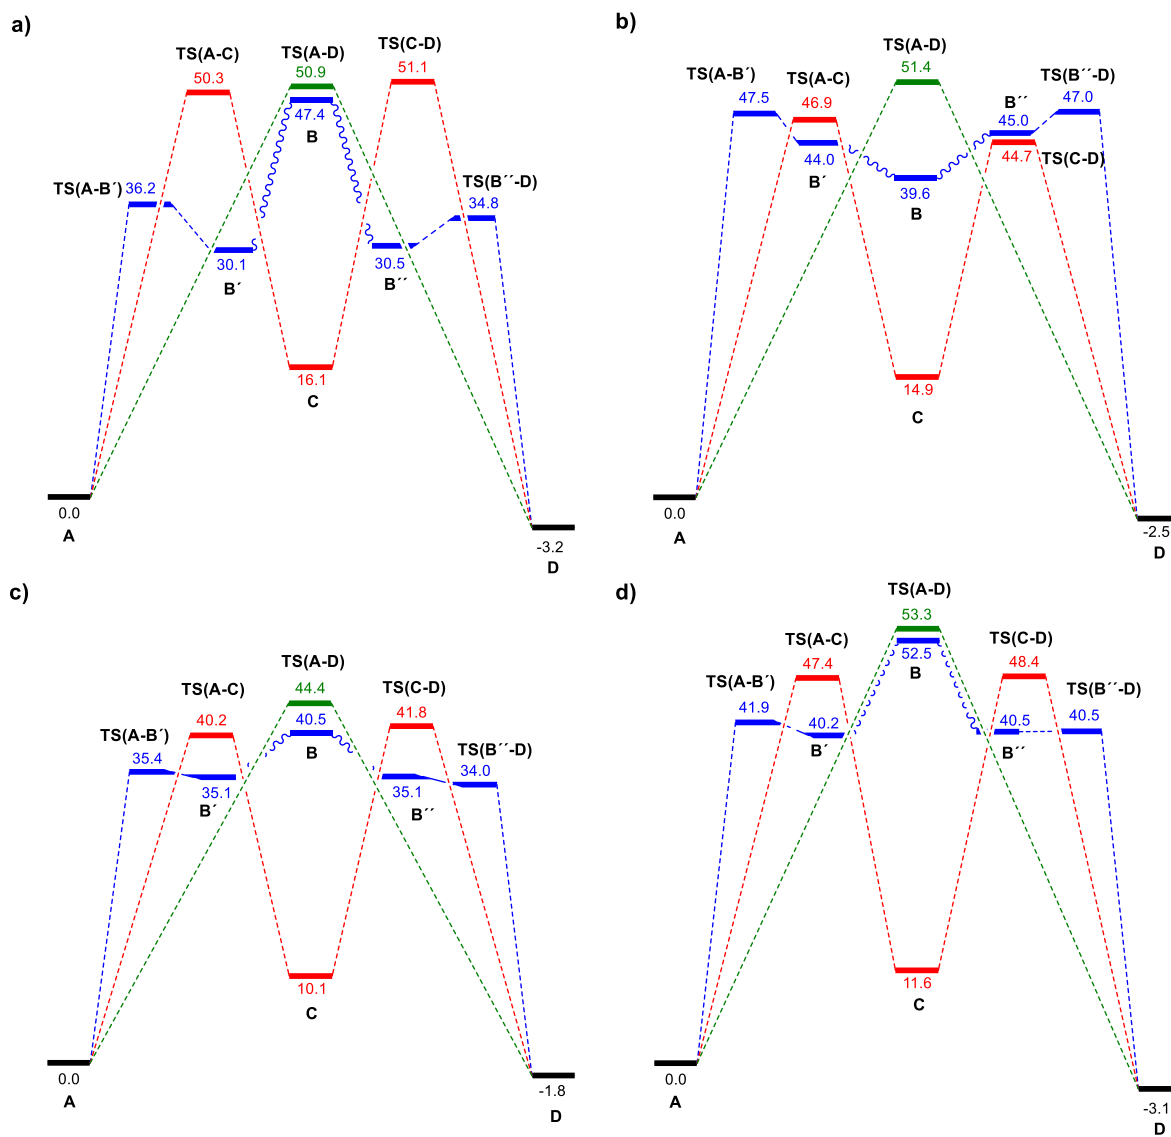

**Figure S19.** Enthalpic energy profiles at 150°C (kcal mol<sup>-1</sup>) for the ligand exchange between propane and catalysts *a)* **1A**; *b)* **6A**; *c)* **7A**; *d)* **8A** calculated at the B3PW91/BS1 level of theory. The three pathways are color coded:  $\alpha$ -H abstraction in blue,  $\sigma$ -bond metathesis in green and C-H addition in red.

**Table S1.** Gibbs free energies at 150°C ( $\Delta G_{150}$ ) and their  $\Delta H$  and  $T\Delta S_{\text{tot}}$  components (in kcal mol<sup>-1</sup>) of the intermediates and transition states involved in the ligand exchange process between propane and catalysts **1A**, **6A-8A** at the B3PW91-D3/BS1 level. The origin of energies is the system **A** + propane.

|                  | <b>1A</b>  |            |                          | <b>6A</b>  |            |                          | <b>7A</b>  |            |                          | <b>8A</b>  |            |                          |
|------------------|------------|------------|--------------------------|------------|------------|--------------------------|------------|------------|--------------------------|------------|------------|--------------------------|
|                  | $\Delta G$ | $\Delta H$ | $T\Delta S_{\text{tot}}$ | $\Delta G$ | $\Delta H$ | $T\Delta S_{\text{tot}}$ | $\Delta G$ | $\Delta H$ | $T\Delta S_{\text{tot}}$ | $\Delta G$ | $\Delta H$ | $T\Delta S_{\text{tot}}$ |
| <b>TS(A-B')</b>  | 34.4       | 34.7       | 0.3                      | 42.9       | 45.2       | 2.3                      | 33.1       | 35.8       | 2.8                      | 38.9       | 41.8       | 2.9                      |
| <b>B'</b>        | 28.1       | 29.2       | 1.1                      | 39.4       | 41.4       | 2.0                      | 31.2       | 36.1       | 4.8                      | 36.1       | 40.2       | 4.1                      |
| <b>B</b>         | 33.7       | 55.2       | <b>21.5</b>              | 30.2       | 55.1       | <b>24.9</b>              | 32.9       | 52.5       | <b>19.7</b>              | 43.9       | 63.4       | <b>19.4</b>              |
| <b>B''</b>       | 28.6       | 34.7       | 6.1                      | 43.6       | 50.2       | 6.6                      | -          | -          | -                        | 38.5       | 45.0       | 6.4                      |
| <b>TS(B''-D)</b> | 33.6       | 39.1       | 5.5                      | 44.6       | 51.7       | 7.1                      | 32.6       | 39.0       | 6.4                      | 41.4       | 44.5       | 3.1                      |
| <b>TS(A-D)</b>   | 54.7       | 36.5       | -18.2                    | 56.4       | 40.7       | -15.7                    | 46.0       | 29.4       | -16.6                    | 55.6       | 38.5       | -17.1                    |
| <b>TS(A-C)</b>   | 53.1       | 35.0       | -18.1                    | 54.2       | 37.3       | -16.9                    | 43.8       | 27.9       | -15.9                    | 49.7       | 31.6       | -18.1                    |
| <b>C</b>         | 16.3       | 0.3        | -16.0                    | 17.0       | 0.6        | -16.4                    | 15.6       | -3.1       | -18.7                    | 12.9       | -2.4       | -15.3                    |
| <b>TS(C-D)</b>   | 56.1       | 35.5       | -20.5                    | 48.2       | 35.8       | -12.5                    | 45.1       | 29.2       | -15.8                    | 52.4       | 32.2       | -20.2                    |
| <b>D</b>         | -0.5       | 2.0        | 2.5                      | -1.5       | 2.8        | 4.3                      | -2.3       | 3.0        | 5.3                      | -0.5       | 2.0        | 2.5                      |

**Table S2.** Gibbs free energies at 150°C ( $\Delta G_{150}$ ) and their  $\Delta H$  and  $T\Delta S_{\text{tot}}$  components (in kcal mol<sup>-1</sup>) of the intermediates and transition states involved in the ligand exchange process between propane and catalysts **1A**, **6A-8A** at the  $\omega$ B97xD/BS1 level. The origin of energies is the system **A** + propane.

|                  | <b>1A</b>  |            |                          | <b>6A</b>  |            |                          | <b>7A</b>  |            |                          | <b>8A</b>  |            |                          |
|------------------|------------|------------|--------------------------|------------|------------|--------------------------|------------|------------|--------------------------|------------|------------|--------------------------|
|                  | $\Delta G$ | $\Delta H$ | $T\Delta S_{\text{tot}}$ | $\Delta G$ | $\Delta H$ | $T\Delta S_{\text{tot}}$ | $\Delta G$ | $\Delta H$ | $T\Delta S_{\text{tot}}$ | $\Delta G$ | $\Delta H$ | $T\Delta S_{\text{tot}}$ |
| <b>TS(A-B')</b>  | 38.3       | 37.4       | -1.0                     | 46.7       | 48.3       | 1.6                      | 38.0       | 35.4       | -2.5                     | 49.0       | 45.1       | -3.9                     |
| <b>B'</b>        | 30.1       | 30.9       | 0.7                      | 43.8       | 47.3       | 3.5                      | 36.2       | 37.7       | 1.6                      | 42.7       | 42.8       | 0.1                      |
| <b>B</b>         | 26.5       | 43.9       | <b>17.4</b>              | 26.3       | 48.1       | <b>21.8</b>              | 35.5       | 52.4       | <b>16.8</b>              | 46.5       | 62.5       | <b>16.0</b>              |
| <b>B''</b>       | 29.5       | 33.4       | 3.9                      | 46.5       | 50.6       | 4.1                      | 39.6       | 41.1       | 1.5                      | 47.1       | 46.5       | -0.5                     |
| <b>TS(B''-D)</b> | 38.2       | 39.5       | 1.4                      | 50.3       | 52.8       | 2.5                      | 37.2       | 37.2       | 0.0                      | 47.4       | 47.1       | -0.3                     |
| <b>TS(A-D)</b>   | 62.9       | 42.2       | -20.7                    | 62.5       | 43.5       | -18.9                    | 55.1       | 32.5       | -22.6                    | 67.5       | 44.2       | -23.3                    |
| <b>TS(A-C)</b>   | 63.0       | 39.4       | -23.6                    | 55.6       | 37.3       | -18.3                    | 50.3       | 29.5       | -20.9                    | 59.0       | 36.6       | -22.4                    |
| <b>C</b>         | 24.4       | 5.9        | -18.5                    | 22.2       | 3.8        | -18.5                    | 16.3       | -3.8       | -20.1                    | 22.6       | 0.3        | -22.3                    |
| <b>TS(C-D)</b>   | 62.8       | 41.2       | -21.6                    | 52.6       | 35.3       | -17.4                    | 54.2       | 31.7       | -22.5                    | 62.4       | 38.1       | -24.3                    |
| <b>D</b>         | -0.7       | 0.8        | 1.5                      | -0.8       | 1.0        | 1.8                      | -1.4       | 1.6        | 3.0                      | 2.3        | 1.7        | -0.7                     |

**Cartesian coordinates of all reactants, products, intermediates, and  
transition states**

**1A**

**E = -1290.6776170**

|    |              |              |              |
|----|--------------|--------------|--------------|
| Mo | 0.605595000  | 0.190231000  | -0.204474000 |
| C  | 0.905648000  | 2.088908000  | -1.157828000 |
| H  | 0.804795000  | 1.775578000  | -2.216024000 |
| H  | 0.035848000  | 2.724565000  | -0.954353000 |
| C  | 2.193418000  | 2.930539000  | -1.015285000 |
| N  | -1.116418000 | 0.033100000  | -0.248634000 |
| O  | 1.796254000  | -1.120252000 | -0.967951000 |
| Si | 3.040388000  | -2.108744000 | -0.517371000 |
| C  | 0.978063000  | 0.507470000  | 1.598019000  |
| H  | 2.090413000  | 0.494145000  | 1.584274000  |
| C  | 0.407148000  | 0.599471000  | 2.994075000  |
| O  | 4.122028000  | -1.416016000 | 0.544092000  |
| H  | 4.853690000  | -0.981367000 | 0.094088000  |
| O  | 3.938596000  | -2.498820000 | -1.866345000 |
| H  | 3.403292000  | -2.619342000 | -2.657041000 |
| O  | 2.354308000  | -3.413505000 | 0.246736000  |
| H  | 2.992355000  | -3.943837000 | 0.734452000  |
| C  | -2.436495000 | -0.364230000 | -0.326089000 |
| C  | -3.445857000 | 0.630682000  | -0.410246000 |
| C  | -2.765223000 | -1.746809000 | -0.310993000 |
| C  | -4.774962000 | 0.215505000  | -0.493318000 |
| C  | -4.112284000 | -2.099886000 | -0.389395000 |
| C  | -5.110554000 | -1.134405000 | -0.483150000 |
| H  | -5.562541000 | 0.959955000  | -0.564150000 |
| H  | -4.388801000 | -3.149921000 | -0.377162000 |
| H  | -6.152712000 | -1.435946000 | -0.545554000 |
| C  | 2.203028000  | 3.984120000  | -2.139337000 |
| H  | 3.089984000  | 4.626206000  | -2.072049000 |
| H  | 2.207651000  | 3.509212000  | -3.127338000 |
| H  | 1.317956000  | 4.627708000  | -2.081920000 |
| C  | 2.224025000  | 3.656022000  | 0.334396000  |
| H  | 1.355038000  | 4.315265000  | 0.443837000  |
| H  | 2.210663000  | 2.946711000  | 1.166167000  |
| H  | 3.125569000  | 4.273387000  | 0.425182000  |
| C  | 3.449272000  | 2.057493000  | -1.157482000 |
| H  | 3.526541000  | 1.328556000  | -0.342097000 |
| H  | 3.444248000  | 1.505118000  | -2.104339000 |
| H  | 4.357147000  | 2.672004000  | -1.132665000 |
| C  | -1.121224000 | 0.703469000  | 2.975879000  |
| H  | -1.508255000 | 0.766559000  | 3.999473000  |
| H  | -1.447674000 | 1.594706000  | 2.431486000  |
| H  | -1.571929000 | -0.167032000 | 2.492045000  |
| C  | 0.995426000  | 1.836634000  | 3.699791000  |
| H  | 0.627451000  | 1.895426000  | 4.730885000  |
| H  | 2.089758000  | 1.792138000  | 3.736627000  |
| H  | 0.708525000  | 2.758012000  | 3.183778000  |
| C  | 0.827503000  | -0.668024000 | 3.767062000  |
| H  | 0.424257000  | -1.566636000 | 3.290018000  |
| H  | 1.917655000  | -0.766802000 | 3.806653000  |
| H  | 0.453165000  | -0.627317000 | 4.797186000  |



|   |              |              |              |
|---|--------------|--------------|--------------|
| C | -1.679692000 | -2.805265000 | -0.255818000 |
| H | -0.816135000 | -2.364184000 | 0.256363000  |
| C | -3.078889000 | 2.101722000  | -0.461743000 |
| H | -2.090220000 | 2.196354000  | 0.000945000  |
| C | -2.953547000 | 2.568621000  | -1.921060000 |
| H | -3.914159000 | 2.480919000  | -2.441552000 |
| H | -2.638808000 | 3.617312000  | -1.967869000 |
| H | -2.219564000 | 1.968487000  | -2.467104000 |
| C | -4.045803000 | 2.999431000  | 0.317392000  |
| H | -3.660526000 | 4.024099000  | 0.350449000  |
| H | -5.035528000 | 3.045189000  | -0.150346000 |
| H | -4.175436000 | 2.652323000  | 1.347228000  |
| C | -2.075883000 | -4.055357000 | 0.535751000  |
| H | -2.853049000 | -4.636916000 | 0.027306000  |
| H | -1.205823000 | -4.709505000 | 0.649742000  |
| H | -2.443691000 | -3.800259000 | 1.534664000  |
| C | -1.229336000 | -3.181682000 | -1.676700000 |
| H | -0.402359000 | -3.898170000 | -1.637709000 |
| H | -2.055517000 | -3.637055000 | -2.234742000 |
| H | -0.890970000 | -2.302458000 | -2.233070000 |

### 1B

**E = -1092.8841856**

|    |              |              |              |
|----|--------------|--------------|--------------|
| Mo | -0.703102000 | -0.177728000 | -0.241455000 |
| N  | 1.033010000  | -0.352490000 | 0.101632000  |
| O  | -1.944115000 | 1.238141000  | -0.742239000 |
| Si | -3.569339000 | 1.540964000  | -0.769132000 |
| C  | -1.412331000 | -1.598567000 | 0.521556000  |
| C  | -1.430290000 | -2.862297000 | 1.305368000  |
| O  | -4.167411000 | 0.740221000  | -2.096050000 |
| H  | -5.127716000 | 0.679427000  | -2.094143000 |
| O  | -3.790502000 | 3.196592000  | -0.818420000 |
| H  | -3.114867000 | 3.642446000  | -1.338921000 |
| O  | -4.439405000 | 1.028513000  | 0.551970000  |
| H  | -4.431182000 | 1.665580000  | 1.272949000  |
| C  | 2.292331000  | 0.175144000  | 0.034427000  |
| C  | 3.130684000  | -0.188077000 | -1.063426000 |
| C  | 2.775359000  | 1.021429000  | 1.075710000  |
| C  | 4.434858000  | 0.297352000  | -1.085163000 |
| C  | 4.092147000  | 1.469341000  | 0.998576000  |
| C  | 4.917535000  | 1.118788000  | -0.067543000 |
| H  | 5.091174000  | 0.031021000  | -1.908039000 |
| H  | 4.484187000  | 2.107283000  | 1.785132000  |
| H  | 5.938830000  | 1.487155000  | -0.106666000 |
| C  | -0.564110000 | -3.914997000 | 0.587930000  |
| H  | -0.584036000 | -4.858985000 | 1.145010000  |
| H  | -0.937412000 | -4.106962000 | -0.423016000 |
| H  | 0.473790000  | -3.577799000 | 0.513675000  |
| C  | -2.887947000 | -3.359159000 | 1.406089000  |
| H  | -2.924445000 | -4.288851000 | 1.986732000  |
| H  | -3.521629000 | -2.616230000 | 1.898691000  |
| H  | -3.303996000 | -3.554470000 | 0.413421000  |
| C  | -0.869499000 | -2.586245000 | 2.713169000  |
| H  | 0.162257000  | -2.227380000 | 2.654968000  |
| H  | -1.468773000 | -1.830828000 | 3.231177000  |
| H  | -0.884572000 | -3.505197000 | 3.310678000  |

|   |             |              |              |
|---|-------------|--------------|--------------|
| C | 1.855447000 | 1.427048000  | 2.210130000  |
| H | 1.125828000 | 0.613966000  | 2.330163000  |
| C | 2.565822000 | -1.058699000 | -2.167831000 |
| H | 1.896015000 | -1.782197000 | -1.680888000 |
| C | 1.701219000 | -0.231827000 | -3.135370000 |
| H | 2.302439000 | 0.524718000  | -3.652231000 |
| H | 1.235767000 | -0.875199000 | -3.890081000 |
| H | 0.899559000 | 0.302312000  | -2.608581000 |
| C | 3.623477000 | -1.845090000 | -2.945535000 |
| H | 3.137787000 | -2.546884000 | -3.631061000 |
| H | 4.258038000 | -1.190155000 | -3.553195000 |
| H | 4.271023000 | -2.419528000 | -2.275990000 |
| C | 2.572642000 | 1.609041000  | 3.550977000  |
| H | 3.235284000 | 2.481746000  | 3.548008000  |
| H | 1.839999000 | 1.766846000  | 4.349220000  |
| H | 3.171585000 | 0.730157000  | 3.808698000  |
| C | 1.065961000 | 2.695400000  | 1.843645000  |
| H | 0.354907000 | 2.952629000  | 2.636857000  |
| H | 1.741319000 | 3.546883000  | 1.702563000  |
| H | 0.500449000 | 2.567753000  | 0.914051000  |

**1B'**

**E = -1290.6308716**

|    |              |              |              |
|----|--------------|--------------|--------------|
| Mo | 0.663251000  | 0.214310000  | -0.325439000 |
| C  | 1.363387000  | 2.725396000  | -0.564285000 |
| H  | 0.952656000  | 2.409374000  | -1.532071000 |
| H  | 0.792439000  | 3.616089000  | -0.282102000 |
| C  | 2.876062000  | 2.989847000  | -0.638892000 |
| N  | -1.041768000 | 0.226133000  | -0.833605000 |
| O  | 1.528223000  | -1.359987000 | -1.092139000 |
| Si | 2.419561000  | -2.588705000 | -0.457243000 |
| C  | 0.660199000  | 0.001075000  | 1.407938000  |
| H  | 1.151224000  | 2.055760000  | 0.332386000  |
| C  | 0.350177000  | -0.240753000 | 2.846632000  |
| O  | 3.870971000  | -2.138053000 | 0.233944000  |
| H  | 4.591497000  | -2.163804000 | -0.403716000 |
| O  | 2.856543000  | -3.612411000 | -1.705732000 |
| H  | 2.178513000  | -3.664238000 | -2.387108000 |
| O  | 1.522771000  | -3.342232000 | 0.726458000  |
| H  | 2.040588000  | -3.982487000 | 1.224761000  |
| C  | -2.370923000 | 0.090092000  | -0.477071000 |
| C  | -3.149551000 | 1.239199000  | -0.171289000 |
| C  | -2.962710000 | -1.204065000 | -0.483362000 |
| C  | -4.501900000 | 1.067612000  | 0.126863000  |
| C  | -4.316451000 | -1.313386000 | -0.164296000 |
| C  | -5.086751000 | -0.194369000 | 0.137934000  |
| H  | -5.110882000 | 1.935127000  | 0.363019000  |
| H  | -4.781457000 | -2.294430000 | -0.150930000 |
| H  | -6.139742000 | -0.306016000 | 0.381692000  |
| C  | 3.127508000  | 4.089560000  | -1.679908000 |
| H  | 4.198575000  | 4.301072000  | -1.766428000 |
| H  | 2.764706000  | 3.792081000  | -2.670407000 |
| H  | 2.624385000  | 5.022437000  | -1.402454000 |
| C  | 3.380511000  | 3.443593000  | 0.737516000  |
| H  | 2.871538000  | 4.357098000  | 1.064827000  |
| H  | 3.213063000  | 2.669633000  | 1.494946000  |

|   |              |              |              |
|---|--------------|--------------|--------------|
| H | 4.454935000  | 3.652703000  | 0.706529000  |
| C | 3.598578000  | 1.702289000  | -1.057184000 |
| H | 3.436598000  | 0.890366000  | -0.333206000 |
| H | 3.270895000  | 1.358227000  | -2.045665000 |
| H | 4.681210000  | 1.861965000  | -1.109413000 |
| C | -0.706707000 | -1.359599000 | 2.933359000  |
| H | -0.931042000 | -1.576513000 | 3.985045000  |
| H | -1.633066000 | -1.061578000 | 2.434604000  |
| H | -0.336768000 | -2.271953000 | 2.458273000  |
| C | -0.200197000 | 1.051151000  | 3.478426000  |
| H | -0.421929000 | 0.885740000  | 4.539376000  |
| H | 0.527702000  | 1.867106000  | 3.410797000  |
| H | -1.121405000 | 1.365990000  | 2.979776000  |
| C | 1.632968000  | -0.680637000 | 3.578255000  |
| H | 2.042207000  | -1.586331000 | 3.123453000  |
| H | 2.401085000  | 0.098174000  | 3.531862000  |
| H | 1.416166000  | -0.885031000 | 4.633864000  |
| C | -2.133562000 | -2.418861000 | -0.864355000 |
| H | -1.139813000 | -2.289285000 | -0.420068000 |
| C | -2.522925000 | 2.621805000  | -0.229427000 |
| H | -1.500245000 | 2.520329000  | 0.155862000  |
| C | -2.425887000 | 3.105249000  | -1.685907000 |
| H | -3.426443000 | 3.213681000  | -2.119088000 |
| H | -1.926843000 | 4.080178000  | -1.746294000 |
| H | -1.869900000 | 2.391095000  | -2.300602000 |
| C | -3.229560000 | 3.667184000  | 0.637290000  |
| H | -2.650493000 | 4.597002000  | 0.652082000  |
| H | -4.223075000 | 3.917120000  | 0.248702000  |
| H | -3.347756000 | 3.324888000  | 1.670317000  |
| C | -2.691469000 | -3.743871000 | -0.339871000 |
| H | -3.631701000 | -4.019127000 | -0.831896000 |
| H | -1.976499000 | -4.549288000 | -0.536593000 |
| H | -2.869943000 | -3.709964000 | 0.739712000  |
| C | -1.946663000 | -2.479626000 | -2.389604000 |
| H | -1.311466000 | -3.329254000 | -2.666384000 |
| H | -2.912797000 | -2.602720000 | -2.892601000 |
| H | -1.477623000 | -1.565140000 | -2.762612000 |

**1B''**

**E = -1212.0244913**

|    |              |              |              |
|----|--------------|--------------|--------------|
| Mo | -0.671232000 | 0.701984000  | -0.274359000 |
| N  | 0.908067000  | 0.118277000  | -0.848077000 |
| O  | -2.099597000 | -0.387485000 | -1.043635000 |
| Si | -3.330951000 | -1.274859000 | -0.406513000 |
| C  | -0.683523000 | 0.462767000  | 1.456756000  |
| C  | -0.425893000 | 0.111477000  | 2.882830000  |
| O  | -2.671200000 | -2.506054000 | 0.498356000  |
| H  | -3.334165000 | -2.985465000 | 1.005245000  |
| O  | -4.282330000 | -1.819391000 | -1.670047000 |
| H  | -3.762347000 | -2.026493000 | -2.453299000 |
| O  | -4.389987000 | -0.445934000 | 0.580319000  |
| H  | -5.126998000 | -0.073970000 | 0.085816000  |
| C  | 2.107944000  | -0.486713000 | -0.519840000 |
| C  | 2.208848000  | -1.904476000 | -0.575815000 |

|   |              |              |              |
|---|--------------|--------------|--------------|
| C | 3.240036000  | 0.307348000  | -0.191144000 |
| C | 3.439523000  | -2.491315000 | -0.279911000 |
| C | 4.447484000  | -0.336417000 | 0.082450000  |
| C | 4.553341000  | -1.723063000 | 0.046301000  |
| H | 3.531548000  | -3.572896000 | -0.305860000 |
| H | 5.322284000  | 0.255190000  | 0.335271000  |
| H | 5.501495000  | -2.203933000 | 0.270956000  |
| C | -0.171052000 | -1.407139000 | 2.959730000  |
| H | -0.030946000 | -1.705891000 | 4.005656000  |
| H | -1.013977000 | -1.963295000 | 2.541695000  |
| H | 0.727995000  | -1.678152000 | 2.399108000  |
| C | -1.661256000 | 0.477757000  | 3.728319000  |
| H | -1.496322000 | 0.202558000  | 4.777041000  |
| H | -1.860495000 | 1.553803000  | 3.687157000  |
| H | -2.550864000 | -0.044137000 | 3.365436000  |
| C | 0.809433000  | 0.874922000  | 3.395129000  |
| H | 1.694301000  | 0.620163000  | 2.804872000  |
| H | 0.655958000  | 1.958297000  | 3.339147000  |
| H | 1.005696000  | 0.617304000  | 4.442875000  |
| C | 3.135556000  | 1.823076000  | -0.202037000 |
| H | 2.145128000  | 2.073814000  | 0.200096000  |
| C | 1.006652000  | -2.736835000 | -0.988217000 |
| H | 0.118600000  | -2.276606000 | -0.539850000 |
| C | 0.823667000  | -2.686948000 | -2.514270000 |
| H | 1.686777000  | -3.132726000 | -3.022221000 |
| H | -0.070937000 | -3.245402000 | -2.813356000 |
| H | 0.715396000  | -1.655625000 | -2.861115000 |
| C | 1.054587000  | -4.186746000 | -0.501092000 |
| H | 0.100886000  | -4.679270000 | -0.715782000 |
| H | 1.838650000  | -4.765901000 | -1.003056000 |
| H | 1.226757000  | -4.246932000 | 0.578465000  |
| C | 4.170543000  | 2.529972000  | 0.676576000  |
| H | 5.186029000  | 2.423501000  | 0.279027000  |
| H | 3.956285000  | 3.603382000  | 0.720073000  |
| H | 4.166281000  | 2.141715000  | 1.699939000  |
| C | 3.199847000  | 2.353432000  | -1.644023000 |
| H | 3.061350000  | 3.441267000  | -1.671524000 |
| H | 4.175018000  | 2.128646000  | -2.090154000 |
| H | 2.431579000  | 1.887502000  | -2.268543000 |
| C | -0.606594000 | 3.236559000  | -0.503900000 |
| H | -0.058262000 | 4.101757000  | -0.114097000 |
| H | -0.044172000 | 2.919398000  | -1.390103000 |
| C | -2.065650000 | 3.586978000  | -0.807217000 |
| H | -0.504967000 | 2.567075000  | 0.416311000  |
| C | -2.180157000 | 4.698895000  | -1.847926000 |
| H | -3.227685000 | 4.942838000  | -2.046936000 |
| H | -1.683054000 | 5.612782000  | -1.505064000 |
| H | -1.719754000 | 4.404138000  | -2.797142000 |
| H | -2.608984000 | 2.701038000  | -1.164785000 |
| H | -2.560563000 | 3.887022000  | 0.123361000  |

### 1C

**E = -1409.7656513**

|    |              |             |              |
|----|--------------|-------------|--------------|
| Mo | 0.494843000  | 0.053671000 | -0.170923000 |
| C  | 0.676177000  | 2.127626000 | -0.660828000 |
| H  | -0.047167000 | 2.259197000 | -1.478384000 |

|    |              |              |              |
|----|--------------|--------------|--------------|
| H  | 0.231262000  | 2.621127000  | 0.217708000  |
| C  | 1.984507000  | 2.862304000  | -1.027305000 |
| N  | -1.260061000 | 0.089875000  | -0.134427000 |
| O  | 2.446337000  | -0.329314000 | -0.308978000 |
| Si | 3.860684000  | -0.951961000 | 0.223628000  |
| C  | 0.735683000  | -0.550460000 | 1.859547000  |
| H  | 0.721485000  | -1.651728000 | 1.790342000  |
| C  | -0.086206000 | -0.062468000 | 3.068142000  |
| O  | 4.488902000  | -0.220055000 | 1.586620000  |
| H  | 5.072356000  | 0.516154000  | 1.377648000  |
| O  | 5.056101000  | -0.770067000 | -0.932398000 |
| H  | 4.735843000  | -0.900814000 | -1.830076000 |
| O  | 3.579264000  | -2.543743000 | 0.631195000  |
| H  | 4.307081000  | -2.932801000 | 1.126682000  |
| C  | -2.630788000 | -0.058848000 | -0.249246000 |
| C  | -3.447282000 | 1.106421000  | -0.332173000 |
| C  | -3.233532000 | -1.350412000 | -0.299905000 |
| C  | -4.823583000 | 0.956829000  | -0.494919000 |
| C  | -4.617598000 | -1.432963000 | -0.461571000 |
| C  | -5.413803000 | -0.299424000 | -0.565110000 |
| H  | -5.445950000 | 1.844709000  | -0.568540000 |
| H  | -5.083100000 | -2.414003000 | -0.505134000 |
| H  | -6.488467000 | -0.394734000 | -0.693509000 |
| C  | 1.596178000  | 4.313132000  | -1.382136000 |
| H  | 2.487973000  | 4.901883000  | -1.629033000 |
| H  | 0.923722000  | 4.345573000  | -2.246967000 |
| H  | 1.091485000  | 4.806563000  | -0.543599000 |
| C  | 2.950933000  | 2.905313000  | 0.163180000  |
| H  | 2.494966000  | 3.420914000  | 1.017033000  |
| H  | 3.227710000  | 1.899694000  | 0.485755000  |
| H  | 3.865828000  | 3.449429000  | -0.100078000 |
| C  | 2.664761000  | 2.235541000  | -2.251396000 |
| H  | 3.008312000  | 1.222871000  | -2.030242000 |
| H  | 1.974098000  | 2.192329000  | -3.102756000 |
| H  | 3.530858000  | 2.832901000  | -2.559634000 |
| C  | -0.252585000 | 1.463486000  | 3.038827000  |
| H  | -0.731862000 | 1.819622000  | 3.958332000  |
| H  | 0.717978000  | 1.966561000  | 2.953031000  |
| H  | -0.877622000 | 1.772613000  | 2.194998000  |
| C  | 0.708775000  | -0.443427000 | 4.334555000  |
| H  | 0.166709000  | -0.140643000 | 5.238810000  |
| H  | 0.871521000  | -1.525815000 | 4.386507000  |
| H  | 1.690049000  | 0.043349000  | 4.349444000  |
| C  | -1.461322000 | -0.729675000 | 3.144126000  |
| H  | -2.069464000 | -0.501694000 | 2.266229000  |
| H  | -1.358083000 | -1.818030000 | 3.218787000  |
| H  | -2.008128000 | -0.387463000 | 4.030806000  |
| C  | -2.444993000 | -2.642762000 | -0.184787000 |
| H  | -1.399311000 | -2.378001000 | -0.000427000 |
| C  | -2.859112000 | 2.503506000  | -0.268936000 |
| H  | -1.803610000 | 2.398828000  | -0.011022000 |
| C  | -2.939372000 | 3.195972000  | -1.637453000 |
| H  | -3.980826000 | 3.338949000  | -1.947034000 |
| H  | -2.462846000 | 4.181770000  | -1.601202000 |
| H  | -2.442483000 | 2.604410000  | -2.413047000 |
| C  | -3.515279000 | 3.362577000  | 0.820748000  |

|   |              |              |              |
|---|--------------|--------------|--------------|
| H | -3.011319000 | 4.332585000  | 0.892502000  |
| H | -4.571371000 | 3.559091000  | 0.606321000  |
| H | -3.458560000 | 2.876748000  | 1.799571000  |
| C | -2.923217000 | -3.504108000 | 0.994290000  |
| H | -3.942058000 | -3.873117000 | 0.833340000  |
| H | -2.273558000 | -4.378504000 | 1.110625000  |
| H | -2.915465000 | -2.945190000 | 1.932845000  |
| C | -2.515033000 | -3.456342000 | -1.486317000 |
| H | -1.908976000 | -4.365179000 | -1.406420000 |
| H | -3.544308000 | -3.764704000 | -1.700809000 |
| H | -2.157076000 | -2.881494000 | -2.344807000 |
| C | 0.432312000  | -1.235593000 | -1.866767000 |
| H | -0.576382000 | -1.240716000 | -2.290172000 |
| H | 1.068761000  | -0.607000000 | -2.515695000 |
| C | 0.997346000  | -2.649433000 | -1.781723000 |
| H | 1.973088000  | -2.643914000 | -1.290010000 |
| H | 0.347147000  | -3.268098000 | -1.150849000 |
| C | 1.120869000  | -3.307624000 | -3.160330000 |
| H | 0.151791000  | -3.364387000 | -3.668197000 |
| H | 1.798606000  | -2.739785000 | -3.808369000 |
| H | 1.515062000  | -4.326306000 | -3.076538000 |
| H | 1.783892000  | -0.269212000 | 2.027589000  |

## 1D

**E = -1212.0770190**

|    |              |              |              |
|----|--------------|--------------|--------------|
| Mo | -0.676113000 | 0.424108000  | -0.260217000 |
| N  | 1.015878000  | 0.057617000  | -0.249333000 |
| O  | -2.021927000 | -0.666614000 | -1.117804000 |
| Si | -3.489548000 | -1.342120000 | -0.772712000 |
| C  | -1.066396000 | 0.810546000  | 1.522649000  |
| H  | -2.167707000 | 0.955520000  | 1.458372000  |
| C  | -0.530557000 | 0.918272000  | 2.928764000  |
| O  | -3.437129000 | -2.748675000 | 0.109536000  |
| H  | -3.319347000 | -3.531698000 | -0.437187000 |
| O  | -4.250784000 | -1.730608000 | -2.202849000 |
| H  | -4.048230000 | -1.119413000 | -2.918038000 |
| O  | -4.301611000 | -0.220918000 | 0.151572000  |
| H  | -5.071138000 | -0.580944000 | 0.603411000  |
| C  | 2.270850000  | -0.517005000 | -0.291932000 |
| C  | 3.398543000  | 0.316462000  | -0.509437000 |
| C  | 2.417505000  | -1.917224000 | -0.104856000 |
| C  | 4.659091000  | -0.279368000 | -0.557556000 |
| C  | 3.703618000  | -2.454896000 | -0.155994000 |
| C  | 4.816466000  | -1.650716000 | -0.384368000 |
| H  | 5.534564000  | 0.340019000  | -0.729638000 |
| H  | 3.840200000  | -3.523033000 | -0.014880000 |
| H  | 5.807974000  | -2.093640000 | -0.422763000 |
| C  | 0.981863000  | 0.678806000  | 2.980344000  |
| H  | 1.347631000  | 0.786962000  | 4.007901000  |
| H  | 1.236214000  | -0.326040000 | 2.630973000  |
| H  | 1.514397000  | 1.394201000  | 2.347205000  |
| C  | -1.248817000 | -0.124427000 | 3.809009000  |
| H  | -0.894858000 | -0.059341000 | 4.844845000  |
| H  | -2.332414000 | 0.036256000  | 3.811456000  |

|   |              |              |              |
|---|--------------|--------------|--------------|
| H | -1.059301000 | -1.139450000 | 3.445850000  |
| C | -0.845230000 | 2.332167000  | 3.458211000  |
| H | -0.345214000 | 3.096119000  | 2.854421000  |
| H | -1.921960000 | 2.533806000  | 3.439024000  |
| H | -0.501241000 | 2.436365000  | 4.494243000  |
| C | 1.205912000  | -2.806112000 | 0.107529000  |
| H | 0.416747000  | -2.179448000 | 0.542656000  |
| C | 3.221575000  | 1.806425000  | -0.734777000 |
| H | 2.268921000  | 2.083399000  | -0.269857000 |
| C | 4.321582000  | 2.655362000  | -0.089142000 |
| H | 5.292907000  | 2.513372000  | -0.575873000 |
| H | 4.073140000  | 3.718483000  | -0.175574000 |
| H | 4.439771000  | 2.420010000  | 0.973223000  |
| C | 3.105984000  | 2.109417000  | -2.237391000 |
| H | 2.925631000  | 3.176976000  | -2.406139000 |
| H | 4.028907000  | 1.834968000  | -2.760942000 |
| H | 2.283046000  | 1.549485000  | -2.691706000 |
| C | 0.690033000  | -3.337039000 | -1.239517000 |
| H | 1.446691000  | -3.967339000 | -1.720164000 |
| H | -0.213301000 | -3.940451000 | -1.096541000 |
| H | 0.445514000  | -2.520076000 | -1.924590000 |
| C | 1.453434000  | -3.957266000 | 1.087710000  |
| H | 0.511666000  | -4.472784000 | 1.302637000  |
| H | 2.143091000  | -4.705005000 | 0.680630000  |
| H | 1.867124000  | -3.597304000 | 2.034852000  |
| C | -0.761111000 | 2.390027000  | -1.085887000 |
| H | 0.090146000  | 2.995617000  | -0.756055000 |
| H | -0.622861000 | 2.220703000  | -2.169711000 |
| C | -2.074937000 | 3.133517000  | -0.830903000 |
| H | -2.137742000 | 3.386351000  | 0.234926000  |
| H | -2.935841000 | 2.481482000  | -1.035377000 |
| C | -2.214346000 | 4.408235000  | -1.668311000 |
| H | -3.155556000 | 4.927173000  | -1.454705000 |
| H | -1.393177000 | 5.104153000  | -1.462498000 |
| H | -2.193873000 | 4.181784000  | -2.740486000 |

**TS(1A-1B)**

**E = -1290.61642173**

|    |              |              |              |
|----|--------------|--------------|--------------|
| Mo | 0.615596000  | 0.317173000  | -0.225184000 |
| C  | 1.003915000  | 2.600313000  | -0.277685000 |
| H  | 0.121483000  | 2.830467000  | -0.884115000 |
| H  | 0.949533000  | 3.299160000  | 0.568928000  |
| C  | 2.317839000  | 2.873085000  | -1.046977000 |
| N  | -1.059190000 | 0.086198000  | -0.760676000 |
| O  | 1.806357000  | -1.045652000 | -0.966100000 |
| Si | 2.849663000  | -2.128766000 | -0.297464000 |
| C  | 0.639148000  | 0.250805000  | 1.540221000  |
| H  | 0.916717000  | 1.673507000  | 0.838673000  |
| C  | 0.405223000  | 0.174212000  | 3.008943000  |
| O  | 4.086383000  | -1.471463000 | 0.608714000  |
| H  | 4.872531000  | -1.302868000 | 0.079656000  |
| O  | 3.624896000  | -2.945146000 | -1.532790000 |
| H  | 3.050267000  | -3.093354000 | -2.290775000 |
| O  | 1.975535000  | -3.125769000 | 0.708316000  |
| H  | 2.536886000  | -3.709111000 | 1.228777000  |
| C  | -2.371323000 | -0.245785000 | -0.473881000 |

|   |              |              |              |
|---|--------------|--------------|--------------|
| C | -3.315325000 | 0.773813000  | -0.172993000 |
| C | -2.773475000 | -1.608496000 | -0.539669000 |
| C | -4.640444000 | 0.404626000  | 0.062219000  |
| C | -4.110142000 | -1.917053000 | -0.286268000 |
| C | -5.041120000 | -0.926604000 | 0.012216000  |
| H | -5.374344000 | 1.170358000  | 0.294539000  |
| H | -4.432538000 | -2.953158000 | -0.322978000 |
| H | -6.077182000 | -1.191720000 | 0.204798000  |
| C | 2.415518000  | 4.391191000  | -1.277326000 |
| H | 3.329195000  | 4.641256000  | -1.828415000 |
| H | 1.562536000  | 4.760809000  | -1.857226000 |
| H | 2.439277000  | 4.935649000  | -0.326648000 |
| C | 3.527475000  | 2.407546000  | -0.222648000 |
| H | 3.550196000  | 2.897390000  | 0.757647000  |
| H | 3.517474000  | 1.324812000  | -0.052702000 |
| H | 4.461744000  | 2.654859000  | -0.739274000 |
| C | 2.311563000  | 2.167548000  | -2.412425000 |
| H | 2.309550000  | 1.074469000  | -2.318493000 |
| H | 1.439432000  | 2.462365000  | -3.007100000 |
| H | 3.208444000  | 2.432843000  | -2.983300000 |
| C | -0.135765000 | -1.242327000 | 3.293976000  |
| H | -0.281455000 | -1.369544000 | 4.373040000  |
| H | -1.094530000 | -1.401439000 | 2.792211000  |
| H | 0.564092000  | -2.003735000 | 2.939798000  |
| C | -0.628808000 | 1.226687000  | 3.448743000  |
| H | -0.806420000 | 1.152244000  | 4.528000000  |
| H | -0.276248000 | 2.243252000  | 3.240608000  |
| H | -1.580615000 | 1.078990000  | 2.931122000  |
| C | 1.732529000  | 0.387515000  | 3.762130000  |
| H | 2.480983000  | -0.344769000 | 3.447609000  |
| H | 2.137511000  | 1.387386000  | 3.572549000  |
| H | 1.575089000  | 0.286656000  | 4.842539000  |
| C | -1.768868000 | -2.683696000 | -0.917690000 |
| H | -0.813405000 | -2.420372000 | -0.449813000 |
| C | -2.886307000 | 2.231046000  | -0.164363000 |
| H | -1.889890000 | 2.264252000  | 0.294039000  |
| C | -2.753655000 | 2.759277000  | -1.602341000 |
| H | -3.725217000 | 2.738851000  | -2.108678000 |
| H | -2.394194000 | 3.795537000  | -1.608533000 |
| H | -2.059979000 | 2.145108000  | -2.184517000 |
| C | -3.793999000 | 3.147726000  | 0.659588000  |
| H | -3.352829000 | 4.147926000  | 0.727898000  |
| H | -4.782423000 | 3.265294000  | 0.201341000  |
| H | -3.936809000 | 2.770631000  | 1.677374000  |
| C | -2.137800000 | -4.084345000 | -0.422877000 |
| H | -3.014337000 | -4.488607000 | -0.942516000 |
| H | -1.306794000 | -4.772138000 | -0.609220000 |
| H | -2.346287000 | -4.092702000 | 0.651887000  |
| C | -1.544748000 | -2.690493000 | -2.439059000 |
| H | -0.782030000 | -3.428460000 | -2.713465000 |
| H | -2.471175000 | -2.950236000 | -2.964243000 |
| H | -1.214174000 | -1.709124000 | -2.790186000 |

**TS(1A-1C)**

**E = -1409.7066723**

|    |               |             |             |
|----|---------------|-------------|-------------|
| Mo | -0.5111786000 | 0.021463000 | 0.016636000 |
|----|---------------|-------------|-------------|



|    |              |              |              |
|----|--------------|--------------|--------------|
| C  | -0.279891000 | -1.702305000 | -1.334817000 |
| H  | 0.404768000  | -1.351370000 | -2.125532000 |
| H  | 0.344463000  | -2.353408000 | -0.702382000 |
| C  | -1.360885000 | -2.584543000 | -1.991541000 |
| N  | 1.234837000  | 0.120156000  | 0.030994000  |
| O  | -2.336661000 | 0.291915000  | -0.777844000 |
| Si | -3.911623000 | 0.548566000  | -0.449272000 |
| C  | -1.034743000 | -0.247941000 | 1.855631000  |
| H  | -1.007907000 | 1.157435000  | 1.345158000  |
| C  | -0.516725000 | -0.355726000 | 3.277689000  |
| O  | -4.554864000 | -0.483437000 | 0.701803000  |
| H  | -4.867874000 | -1.312453000 | 0.325890000  |
| O  | -4.860123000 | 0.329263000  | -1.807311000 |
| H  | -4.424147000 | 0.606715000  | -2.618991000 |
| O  | -4.083486000 | 2.079315000  | 0.200136000  |
| H  | -4.967010000 | 2.228779000  | 0.552254000  |
| C  | 2.577029000  | 0.157580000  | -0.298292000 |
| C  | 3.441778000  | -0.862873000 | 0.190769000  |
| C  | 3.087378000  | 1.183666000  | -1.147069000 |
| C  | 4.793446000  | -0.810951000 | -0.155029000 |
| C  | 4.445880000  | 1.178767000  | -1.456496000 |
| C  | 5.300359000  | 0.197346000  | -0.963608000 |
| H  | 5.461139000  | -1.585361000 | 0.212702000  |
| H  | 4.846629000  | 1.956930000  | -2.098393000 |
| H  | 6.356659000  | 0.216194000  | -1.217432000 |
| C  | -0.663533000 | -3.816369000 | -2.604352000 |
| H  | -1.386308000 | -4.470534000 | -3.108683000 |
| H  | 0.087046000  | -3.515175000 | -3.344565000 |
| H  | -0.155364000 | -4.409458000 | -1.834961000 |
| C  | -2.375829000 | -3.082586000 | -0.953457000 |
| H  | -1.874138000 | -3.645557000 | -0.156831000 |
| H  | -2.902945000 | -2.246326000 | -0.488699000 |
| H  | -3.117897000 | -3.747332000 | -1.413164000 |
| C  | -2.077612000 | -1.838721000 | -3.125431000 |
| H  | -2.589448000 | -0.954730000 | -2.743909000 |
| H  | -1.358310000 | -1.517280000 | -3.888849000 |
| H  | -2.814234000 | -2.486786000 | -3.616057000 |
| C  | -0.492660000 | -1.856738000 | 3.631040000  |
| H  | -0.193032000 | -1.990407000 | 4.676937000  |
| H  | -1.480018000 | -2.312793000 | 3.502001000  |
| H  | 0.216466000  | -2.397779000 | 2.998056000  |
| C  | -1.502274000 | 0.363964000  | 4.220222000  |
| H  | -1.169553000 | 0.272366000  | 5.260466000  |
| H  | -1.570637000 | 1.431140000  | 3.982923000  |
| H  | -2.508249000 | -0.062780000 | 4.146872000  |
| C  | 0.880840000  | 0.242665000  | 3.453099000  |
| H  | 1.594395000  | -0.204885000 | 2.760037000  |
| H  | 0.875886000  | 1.322010000  | 3.275317000  |
| H  | 1.236238000  | 0.072588000  | 4.475353000  |
| C  | 2.169750000  | 2.228870000  | -1.752299000 |
| H  | 1.340973000  | 2.364593000  | -1.053625000 |
| C  | 2.946061000  | -2.027865000 | 1.029279000  |
| H  | 1.889447000  | -1.848227000 | 1.250271000  |
| C  | 3.038351000  | -3.345110000 | 0.242195000  |
| H  | 4.079097000  | -3.591678000 | 0.003668000  |
| H  | 2.627025000  | -4.172633000 | 0.831040000  |

|   |              |              |              |
|---|--------------|--------------|--------------|
| H | 2.484765000  | -3.287715000 | -0.699032000 |
| C | 3.702458000  | -2.148473000 | 2.360271000  |
| H | 3.262101000  | -2.939136000 | 2.977374000  |
| H | 4.755028000  | -2.407322000 | 2.201996000  |
| H | 3.673165000  | -1.215889000 | 2.931096000  |
| C | 2.830804000  | 3.597865000  | -1.943497000 |
| H | 3.592347000  | 3.582393000  | -2.730796000 |
| H | 2.079178000  | 4.334870000  | -2.244601000 |
| H | 3.303161000  | 3.951377000  | -1.021788000 |
| C | 1.581134000  | 1.724917000  | -3.080958000 |
| H | 0.881909000  | 2.458510000  | -3.498080000 |
| H | 2.375828000  | 1.558580000  | -3.816681000 |
| H | 1.045289000  | 0.779805000  | -2.951737000 |
| C | -0.856959000 | 2.343315000  | 0.363611000  |
| H | -0.660310000 | 2.509249000  | -0.702956000 |
| H | -1.912466000 | 2.589615000  | 0.504687000  |
| C | 0.055904000  | 3.217191000  | 1.218387000  |
| H | -0.211322000 | 3.103402000  | 2.277936000  |
| H | 1.096406000  | 2.880741000  | 1.134086000  |
| C | -0.042836000 | 4.696899000  | 0.841653000  |
| H | 0.260139000  | 4.861312000  | -0.198288000 |
| H | -1.070442000 | 5.060995000  | 0.946913000  |
| H | 0.600447000  | 5.313926000  | 1.478533000  |
| H | -2.116799000 | -0.462481000 | 1.802349000  |

**TS(1A-1D)**

**E = -1409.70540590**

|    |              |              |              |
|----|--------------|--------------|--------------|
| Mo | 0.555459000  | 0.196592000  | -0.179259000 |
| C  | -0.032404000 | 2.286042000  | -1.186216000 |
| H  | -0.653950000 | 2.074145000  | -2.067399000 |
| H  | -0.714265000 | 2.345735000  | -0.332858000 |
| C  | 0.636994000  | 3.675741000  | -1.345074000 |
| N  | -1.096512000 | -0.317242000 | -0.042265000 |
| O  | 1.567499000  | -1.531341000 | -0.273468000 |
| Si | 2.442117000  | -2.367034000 | 0.823223000  |
| C  | 1.051894000  | 0.837320000  | 1.504635000  |
| H  | 2.113951000  | 1.104444000  | 1.300587000  |
| C  | 0.650109000  | 0.988676000  | 2.954652000  |
| O  | 3.803332000  | -1.585184000 | 1.405720000  |
| H  | 4.582002000  | -1.786556000 | 0.876830000  |
| O  | 3.047820000  | -3.751395000 | 0.099742000  |
| H  | 2.443889000  | -4.111556000 | -0.557122000 |
| O  | 1.489595000  | -2.705304000 | 2.151642000  |
| H  | 1.988142000  | -3.125043000 | 2.859996000  |
| C  | -2.371885000 | -0.801214000 | -0.292748000 |
| C  | -3.502753000 | -0.019588000 | 0.066011000  |
| C  | -2.539277000 | -2.075758000 | -0.899270000 |
| C  | -4.774121000 | -0.525839000 | -0.209549000 |
| C  | -3.834930000 | -2.525556000 | -1.152030000 |
| C  | -4.949124000 | -1.764078000 | -0.815455000 |
| H  | -5.646054000 | 0.066692000  | 0.055577000  |
| H  | -3.974559000 | -3.494852000 | -1.622868000 |
| H  | -5.948973000 | -2.136171000 | -1.021354000 |
| C  | 1.420507000  | 3.795006000  | -2.661629000 |
| H  | 1.753078000  | 4.828513000  | -2.810877000 |
| H  | 2.314567000  | 3.165066000  | -2.671463000 |

|   |              |              |              |
|---|--------------|--------------|--------------|
| H | 0.799210000  | 3.520417000  | -3.522164000 |
| C | -0.490744000 | 4.724649000  | -1.367593000 |
| H | -1.183850000 | 4.543447000  | -2.196689000 |
| H | -1.068196000 | 4.706010000  | -0.436807000 |
| H | -0.081091000 | 5.734584000  | -1.488579000 |
| C | 1.569327000  | 3.982213000  | -0.168401000 |
| H | 1.034486000  | 3.923346000  | 0.784043000  |
| H | 2.408702000  | 3.279922000  | -0.123238000 |
| H | 1.986076000  | 4.991874000  | -0.261036000 |
| C | -0.533688000 | 0.073166000  | 3.291534000  |
| H | -0.815914000 | 0.197682000  | 4.343668000  |
| H | -1.402010000 | 0.306287000  | 2.671842000  |
| H | -0.267561000 | -0.972618000 | 3.117517000  |
| C | 0.270878000  | 2.457258000  | 3.228812000  |
| H | -0.006616000 | 2.581558000  | 4.282336000  |
| H | 1.107556000  | 3.133007000  | 3.022043000  |
| H | -0.581219000 | 2.766446000  | 2.615087000  |
| C | 1.851675000  | 0.602836000  | 3.839300000  |
| H | 2.153408000  | -0.429919000 | 3.647980000  |
| H | 2.714115000  | 1.251125000  | 3.647778000  |
| H | 1.586569000  | 0.697272000  | 4.898895000  |
| C | -1.347652000 | -2.924451000 | -1.302986000 |
| H | -0.460515000 | -2.503590000 | -0.822789000 |
| C | -3.372619000 | 1.347515000  | 0.713276000  |
| H | -2.309207000 | 1.509436000  | 0.918266000  |
| C | -3.847204000 | 2.458509000  | -0.235399000 |
| H | -4.913767000 | 2.353144000  | -0.463182000 |
| H | -3.701353000 | 3.444813000  | 0.219235000  |
| H | -3.301107000 | 2.435867000  | -1.183018000 |
| C | -4.119859000 | 1.424502000  | 2.052320000  |
| H | -3.939195000 | 2.390981000  | 2.535666000  |
| H | -5.202191000 | 1.324316000  | 1.916052000  |
| H | -3.797177000 | 0.635473000  | 2.737770000  |
| C | -1.471225000 | -4.377056000 | -0.826197000 |
| H | -2.301240000 | -4.904313000 | -1.309482000 |
| H | -0.557110000 | -4.932388000 | -1.065247000 |
| H | -1.622428000 | -4.427440000 | 0.256155000  |
| C | -1.130014000 | -2.859009000 | -2.822998000 |
| H | -0.238991000 | -3.427570000 | -3.112877000 |
| H | -1.986318000 | -3.276717000 | -3.364973000 |
| H | -0.995878000 | -1.826350000 | -3.162262000 |
| C | 1.975446000  | 0.457657000  | -2.115783000 |
| H | 1.740517000  | -0.580212000 | -2.374701000 |
| H | 1.019150000  | 1.379482000  | -1.538831000 |
| C | 3.438495000  | 0.598994000  | -1.696782000 |
| H | 3.625957000  | -0.004040000 | -0.801367000 |
| H | 3.648484000  | 1.640979000  | -1.418378000 |
| C | 4.413277000  | 0.173165000  | -2.797767000 |
| H | 5.454864000  | 0.294577000  | -2.479534000 |
| H | 4.263926000  | -0.878543000 | -3.065550000 |
| H | 4.270499000  | 0.769279000  | -3.706281000 |
| H | 1.785677000  | 1.045858000  | -3.023839000 |

**TS(1B-1D)**

**E = -1212.01324140**

|    |              |             |              |
|----|--------------|-------------|--------------|
| Mo | -0.659629000 | 0.588239000 | -0.357037000 |
|----|--------------|-------------|--------------|

|    |              |              |              |
|----|--------------|--------------|--------------|
| N  | 0.942934000  | -0.022088000 | -0.803890000 |
| O  | -2.090913000 | -0.518966000 | -1.089738000 |
| Si | -3.394846000 | -1.314479000 | -0.475154000 |
| C  | -0.730006000 | 0.674274000  | 1.408276000  |
| C  | -0.516142000 | 0.675690000  | 2.881754000  |
| O  | -2.850121000 | -2.356635000 | 0.702380000  |
| H  | -3.569570000 | -2.757711000 | 1.200185000  |
| O  | -4.181101000 | -2.081957000 | -1.734341000 |
| H  | -3.569713000 | -2.401594000 | -2.405741000 |
| O  | -4.559253000 | -0.349326000 | 0.226431000  |
| H  | -5.209663000 | -0.042448000 | -0.413068000 |
| C  | 2.158396000  | -0.572153000 | -0.438351000 |
| C  | 2.268003000  | -1.980938000 | -0.279723000 |
| C  | 3.294662000  | 0.266731000  | -0.279786000 |
| C  | 3.514759000  | -2.513055000 | 0.050296000  |
| C  | 4.516699000  | -0.324528000 | 0.042914000  |
| C  | 4.633160000  | -1.700538000 | 0.211801000  |
| H  | 3.615820000  | -3.585680000 | 0.184947000  |
| H  | 5.394639000  | 0.301446000  | 0.170556000  |
| H  | 5.593598000  | -2.139183000 | 0.468429000  |
| C  | -0.425267000 | -0.802395000 | 3.314156000  |
| H  | -0.318191000 | -0.860337000 | 4.403605000  |
| H  | -1.322663000 | -1.351779000 | 3.017802000  |
| H  | 0.439634000  | -1.288605000 | 2.854040000  |
| C  | -1.709748000 | 1.351672000  | 3.583787000  |
| H  | -1.574817000 | 1.321840000  | 4.671450000  |
| H  | -1.801389000 | 2.401745000  | 3.285336000  |
| H  | -2.646375000 | 0.845483000  | 3.334197000  |
| C  | 0.792498000  | 1.405307000  | 3.235953000  |
| H  | 1.646007000  | 0.933463000  | 2.741352000  |
| H  | 0.755338000  | 2.456875000  | 2.929509000  |
| H  | 0.959877000  | 1.380753000  | 4.319131000  |
| C  | 3.173039000  | 1.763392000  | -0.510829000 |
| H  | 2.206307000  | 2.070404000  | -0.092223000 |
| C  | 1.057689000  | -2.871477000 | -0.506784000 |
| H  | 0.183765000  | -2.350170000 | -0.097854000 |
| C  | 0.810869000  | -3.062127000 | -2.012587000 |
| H  | 1.656702000  | -3.580156000 | -2.479165000 |
| H  | -0.089551000 | -3.663907000 | -2.181480000 |
| H  | 0.679491000  | -2.098869000 | -2.512977000 |
| C  | 1.139088000  | -4.227388000 | 0.198400000  |
| H  | 0.181571000  | -4.749526000 | 0.104424000  |
| H  | 1.905613000  | -4.875647000 | -0.241997000 |
| H  | 1.359572000  | -4.118191000 | 1.265260000  |
| C  | 4.253564000  | 2.595046000  | 0.184645000  |
| H  | 5.242834000  | 2.434025000  | -0.258287000 |
| H  | 4.028379000  | 3.662094000  | 0.082726000  |
| H  | 4.320173000  | 2.363538000  | 1.252572000  |
| C  | 3.142236000  | 2.072460000  | -2.016862000 |
| H  | 2.999094000  | 3.145163000  | -2.194955000 |
| H  | 4.086716000  | 1.777317000  | -2.487555000 |
| H  | 2.335029000  | 1.525683000  | -2.513383000 |
| C  | -0.593130000 | 2.858323000  | -0.636176000 |
| H  | -0.304053000 | 3.638584000  | 0.080270000  |
| H  | 0.194168000  | 2.866897000  | -1.396779000 |
| C  | -1.977956000 | 3.186604000  | -1.210445000 |

|   |              |             |              |
|---|--------------|-------------|--------------|
| H | -0.577769000 | 2.060711000 | 0.577070000  |
| C | -2.055630000 | 4.619672000 | -1.743206000 |
| H | -3.049522000 | 4.835341000 | -2.147926000 |
| H | -1.852012000 | 5.345360000 | -0.948249000 |
| H | -1.324826000 | 4.784353000 | -2.542035000 |
| H | -2.230913000 | 2.489220000 | -2.020298000 |
| H | -2.741146000 | 3.042459000 | -0.435212000 |

**TS(1C-1D)**

**E = -1409.70518416**

|    |              |              |              |
|----|--------------|--------------|--------------|
| Mo | 0.398150000  | -0.088672000 | -0.126172000 |
| C  | 1.016913000  | 2.151482000  | 0.406370000  |
| H  | 0.674417000  | 2.429308000  | -0.597662000 |
| H  | 0.264690000  | 2.544509000  | 1.099390000  |
| C  | 2.383376000  | 2.847812000  | 0.640577000  |
| N  | -1.321619000 | 0.241188000  | -0.048865000 |
| O  | 2.252159000  | -0.203653000 | -0.849685000 |
| Si | 3.602746000  | -1.080668000 | -1.104842000 |
| C  | 0.859897000  | -0.584331000 | 1.682530000  |
| H  | 1.877026000  | -1.003595000 | 1.626321000  |
| C  | 0.261757000  | -0.704455000 | 3.072955000  |
| O  | 5.002319000  | -0.183732000 | -1.240731000 |
| H  | 5.190599000  | 0.062320000  | -2.151859000 |
| O  | 3.546554000  | -1.952249000 | -2.530227000 |
| H  | 2.670884000  | -2.302527000 | -2.722397000 |
| O  | 3.796811000  | -2.034454000 | 0.255961000  |
| H  | 4.673338000  | -2.428751000 | 0.307645000  |
| C  | -2.672023000 | 0.416336000  | -0.289808000 |
| C  | -3.144609000 | 1.640476000  | -0.846669000 |
| C  | -3.584789000 | -0.633668000 | 0.008393000  |
| C  | -4.510454000 | 1.788144000  | -1.074737000 |
| C  | -4.942559000 | -0.425476000 | -0.246289000 |
| C  | -5.410323000 | 0.768360000  | -0.777258000 |
| H  | -4.882105000 | 2.718037000  | -1.493163000 |
| H  | -5.647148000 | -1.222307000 | -0.023099000 |
| H  | -6.472003000 | 0.906378000  | -0.962476000 |
| C  | 2.068418000  | 4.301993000  | 1.043823000  |
| H  | 2.993699000  | 4.874329000  | 1.178619000  |
| H  | 1.473518000  | 4.807107000  | 0.274046000  |
| H  | 1.508017000  | 4.345378000  | 1.985157000  |
| C  | 3.198023000  | 2.190629000  | 1.759867000  |
| H  | 2.649613000  | 2.197257000  | 2.708939000  |
| H  | 3.451989000  | 1.156132000  | 1.510245000  |
| H  | 4.136296000  | 2.732882000  | 1.921710000  |
| C  | 3.217321000  | 2.876564000  | -0.647733000 |
| H  | 3.503767000  | 1.872009000  | -0.958678000 |
| H  | 2.658199000  | 3.350097000  | -1.464081000 |
| H  | 4.132279000  | 3.459624000  | -0.491000000 |
| C  | -0.981806000 | 0.168140000  | 3.264425000  |
| H  | -1.400733000 | 0.013619000  | 4.265000000  |
| H  | -0.734816000 | 1.231061000  | 3.167713000  |
| H  | -1.751980000 | -0.061854000 | 2.526013000  |
| C  | 1.320117000  | -0.314741000 | 4.123685000  |
| H  | 0.925158000  | -0.474537000 | 5.133506000  |
| H  | 2.229471000  | -0.915618000 | 4.016903000  |
| H  | 1.599577000  | 0.739525000  | 4.038606000  |

|   |              |              |              |
|---|--------------|--------------|--------------|
| C | -0.093262000 | -2.192536000 | 3.270941000  |
| H | -0.859487000 | -2.513267000 | 2.560959000  |
| H | 0.786163000  | -2.830518000 | 3.133076000  |
| H | -0.473311000 | -2.354409000 | 4.286340000  |
| C | -3.143546000 | -1.974917000 | 0.566959000  |
| H | -2.062654000 | -1.922834000 | 0.728481000  |
| C | -2.170179000 | 2.738186000  | -1.228276000 |
| H | -1.360419000 | 2.708237000  | -0.494097000 |
| C | -1.561865000 | 2.453112000  | -2.612013000 |
| H | -2.337477000 | 2.482500000  | -3.385411000 |
| H | -0.802899000 | 3.201371000  | -2.867437000 |
| H | -1.094951000 | 1.463613000  | -2.651203000 |
| C | -2.764569000 | 4.148650000  | -1.183717000 |
| H | -1.971536000 | 4.889886000  | -1.326791000 |
| H | -3.500884000 | 4.312987000  | -1.978214000 |
| H | -3.249159000 | 4.353159000  | -0.223781000 |
| C | -3.816809000 | -2.283004000 | 1.912585000  |
| H | -4.901341000 | -2.391170000 | 1.802315000  |
| H | -3.435199000 | -3.223925000 | 2.324087000  |
| H | -3.635714000 | -1.493261000 | 2.647230000  |
| C | -3.410139000 | -3.108077000 | -0.435578000 |
| H | -3.039497000 | -4.061451000 | -0.043342000 |
| H | -4.482228000 | -3.224022000 | -0.630157000 |
| H | -2.916231000 | -2.918336000 | -1.392517000 |
| C | 0.013655000  | -1.585989000 | -1.680610000 |
| H | -1.037831000 | -1.556710000 | -1.992527000 |
| H | 0.609114000  | -1.249605000 | -2.544347000 |
| C | 0.387104000  | -3.027317000 | -1.311509000 |
| H | 1.415629000  | -3.080884000 | -0.930356000 |
| H | -0.242946000 | -3.364297000 | -0.478583000 |
| C | 0.230500000  | -4.014014000 | -2.474063000 |
| H | -0.800311000 | -4.023665000 | -2.845040000 |
| H | 0.871307000  | -3.744265000 | -3.323483000 |
| H | 0.491188000  | -5.035853000 | -2.175679000 |
| H | 1.113875000  | 0.856145000  | 1.262517000  |

## 2A

**E = -823.885848489**

|    |              |              |              |
|----|--------------|--------------|--------------|
| Mo | -0.185966000 | -0.033922000 | -1.015617000 |
| C  | -1.206717000 | 1.847230000  | -0.862285000 |
| H  | -0.653577000 | 2.419917000  | -1.632396000 |
| H  | -2.218944000 | 1.716029000  | -1.262097000 |
| C  | -1.265534000 | 2.690907000  | 0.429847000  |
| N  | -0.869103000 | -0.680618000 | -2.448385000 |
| O  | 1.699719000  | 0.229763000  | -0.757667000 |
| Si | 2.874485000  | -0.259543000 | 0.299654000  |
| C  | -0.939032000 | -1.074978000 | 0.340644000  |
| H  | -0.396667000 | -0.697184000 | 1.233695000  |
| C  | -1.838293000 | -2.250806000 | 0.641268000  |
| O  | 2.415415000  | -0.199987000 | 1.900088000  |
| H  | 2.641588000  | 0.637060000  | 2.318426000  |
| O  | 4.178242000  | 0.770581000  | 0.178372000  |
| H  | 4.358513000  | 1.051098000  | -0.724517000 |
| O  | 3.210953000  | -1.839233000 | -0.077227000 |
| H  | 3.732668000  | -2.288298000 | 0.595218000  |
| C  | -1.731672000 | 4.109836000  | 0.050960000  |

|   |              |              |              |
|---|--------------|--------------|--------------|
| H | -1.810676000 | 4.749480000  | 0.938662000  |
| H | -1.029105000 | 4.585501000  | -0.643073000 |
| H | -2.714665000 | 4.084666000  | -0.432570000 |
| C | -2.267005000 | 2.100079000  | 1.428302000  |
| H | -3.269835000 | 2.043332000  | 0.989698000  |
| H | -1.978730000 | 1.090313000  | 1.731681000  |
| H | -2.330839000 | 2.721751000  | 2.329192000  |
| C | 0.117931000  | 2.795199000  | 1.089639000  |
| H | 0.473321000  | 1.818619000  | 1.438652000  |
| H | 0.861848000  | 3.191051000  | 0.388547000  |
| H | 0.087070000  | 3.462838000  | 1.958922000  |
| C | -2.566421000 | -2.748475000 | -0.610736000 |
| H | -3.217475000 | -3.593022000 | -0.357679000 |
| H | -3.180659000 | -1.957046000 | -1.050139000 |
| H | -1.854427000 | -3.080895000 | -1.371907000 |
| C | -2.874400000 | -1.825288000 | 1.700288000  |
| H | -3.512019000 | -2.675633000 | 1.969640000  |
| H | -2.386339000 | -1.469951000 | 2.614778000  |
| H | -3.516372000 | -1.023608000 | 1.322937000  |
| C | -0.967800000 | -3.387568000 | 1.216141000  |
| H | -0.215608000 | -3.709026000 | 0.489047000  |
| H | -0.445630000 | -3.067498000 | 2.124326000  |
| H | -1.591415000 | -4.252703000 | 1.471504000  |
| H | -0.981494000 | -1.159960000 | -3.334014000 |

## 2B

**E = -626.091109656**

|    |              |              |              |
|----|--------------|--------------|--------------|
| Mo | 0.303037000  | -1.377253000 | 0.335640000  |
| N  | 0.930489000  | -2.157686000 | -1.147757000 |
| O  | -1.562880000 | -0.868252000 | 0.148722000  |
| Si | -2.292947000 | 0.604467000  | -0.031898000 |
| C  | 1.330582000  | 0.022818000  | 0.369021000  |
| C  | 2.340937000  | 1.042642000  | -0.018629000 |
| O  | -2.242206000 | 1.345838000  | 1.454849000  |
| H  | -2.523210000 | 2.265742000  | 1.426311000  |
| O  | -3.842363000 | 0.341725000  | -0.597388000 |
| H  | -4.222869000 | -0.476071000 | -0.261732000 |
| O  | -1.594309000 | 1.648557000  | -1.121880000 |
| H  | -1.819920000 | 1.441219000  | -2.034231000 |
| C  | 3.743287000  | 0.507929000  | 0.333065000  |
| H  | 4.503443000  | 1.247121000  | 0.054905000  |
| H  | 3.836373000  | 0.315883000  | 1.407273000  |
| H  | 3.952745000  | -0.421148000 | -0.205207000 |
| C  | 2.067326000  | 2.356487000  | 0.737676000  |
| H  | 2.801165000  | 3.116500000  | 0.443666000  |
| H  | 1.067035000  | 2.732991000  | 0.507651000  |
| H  | 2.139447000  | 2.210995000  | 1.820179000  |
| C  | 2.226553000  | 1.268575000  | -1.538514000 |
| H  | 2.361989000  | 0.328711000  | -2.080864000 |
| H  | 1.242425000  | 1.673663000  | -1.789135000 |
| H  | 2.992841000  | 1.981090000  | -1.866073000 |
| H  | 0.210775000  | -2.864451000 | -1.408909000 |

## 2B'

**E = -823.842629305**

|    |             |              |              |
|----|-------------|--------------|--------------|
| Mo | 0.222059000 | -0.041595000 | -0.961082000 |
|----|-------------|--------------|--------------|

|    |              |              |              |
|----|--------------|--------------|--------------|
| C  | 2.826615000  | -0.111060000 | -0.724496000 |
| H  | 2.548130000  | -0.805272000 | -1.528003000 |
| H  | 3.576344000  | 0.554195000  | -1.165174000 |
| C  | 3.336544000  | -0.847471000 | 0.523893000  |
| N  | 0.130749000  | 0.475091000  | -2.650964000 |
| O  | -1.133381000 | -1.410160000 | -0.634975000 |
| Si | -2.448152000 | -1.537050000 | 0.342993000  |
| C  | -0.204048000 | 1.355297000  | -0.007562000 |
| H  | 2.039219000  | 0.647627000  | -0.409313000 |
| C  | -0.655669000 | 2.677821000  | 0.513742000  |
| O  | -2.119351000 | -1.766850000 | 1.963047000  |
| H  | -2.009814000 | -2.698699000 | 2.176827000  |
| O  | -3.300373000 | -2.904254000 | -0.108843000 |
| H  | -3.247477000 | -3.061582000 | -1.057226000 |
| O  | -3.347751000 | -0.139063000 | 0.228214000  |
| H  | -4.068662000 | -0.122839000 | 0.865832000  |
| C  | 4.530655000  | -1.725124000 | 0.125298000  |
| H  | 4.920018000  | -2.265782000 | 0.994509000  |
| H  | 4.246320000  | -2.466538000 | -0.630005000 |
| H  | 5.347310000  | -1.121506000 | -0.286051000 |
| C  | 3.768490000  | 0.177680000  | 1.580830000  |
| H  | 4.569619000  | 0.823308000  | 1.203956000  |
| H  | 2.929825000  | 0.816472000  | 1.879602000  |
| H  | 4.139975000  | -0.325856000 | 2.479554000  |
| C  | 2.206494000  | -1.722015000 | 1.083971000  |
| H  | 1.336719000  | -1.113975000 | 1.376686000  |
| H  | 1.881335000  | -2.477689000 | 0.358312000  |
| H  | 2.528072000  | -2.254602000 | 1.985617000  |
| C  | -1.704287000 | 3.246333000  | -0.461465000 |
| H  | -2.063862000 | 4.218202000  | -0.102337000 |
| H  | -1.276545000 | 3.388561000  | -1.459033000 |
| H  | -2.555461000 | 2.565625000  | -0.546558000 |
| C  | 0.552964000  | 3.628609000  | 0.600539000  |
| H  | 0.237843000  | 4.607214000  | 0.981444000  |
| H  | 1.317128000  | 3.234530000  | 1.279016000  |
| H  | 1.010182000  | 3.774990000  | -0.383314000 |
| C  | -1.284768000 | 2.496597000  | 1.907669000  |
| H  | -2.124752000 | 1.799667000  | 1.856856000  |
| H  | -0.554717000 | 2.096795000  | 2.618642000  |
| H  | -1.646169000 | 3.458914000  | 2.290710000  |
| H  | -0.079271000 | 1.370916000  | -3.094314000 |

**2B''**

**E = -745.236043492**

|    |              |              |              |
|----|--------------|--------------|--------------|
| Mo | 0.684308000  | 0.080392000  | -0.785669000 |
| N  | 0.889944000  | -0.415835000 | -2.471832000 |
| O  | -0.770567000 | 1.376447000  | -0.631525000 |
| Si | -2.207618000 | 1.424808000  | 0.165213000  |
| C  | 0.223164000  | -1.354299000 | 0.094267000  |
| C  | -0.196374000 | -2.704395000 | 0.567849000  |
| O  | -3.026319000 | 0.003773000  | -0.126437000 |
| H  | -3.822966000 | -0.070640000 | 0.408595000  |
| O  | -3.041051000 | 2.781870000  | -0.347969000 |
| H  | -2.875831000 | 2.974739000  | -1.276624000 |
| O  | -2.106188000 | 1.603121000  | 1.821067000  |
| H  | -2.100669000 | 2.529759000  | 2.080573000  |



|   |              |              |              |
|---|--------------|--------------|--------------|
| C | -0.935712000 | -3.415907000 | -0.581032000 |
| H | -1.265840000 | -4.410313000 | -0.257359000 |
| H | -1.813105000 | -2.840068000 | -0.888052000 |
| H | -0.283681000 | -3.539669000 | -1.451583000 |
| C | -1.133996000 | -2.556573000 | 1.780729000  |
| H | -1.476584000 | -3.541850000 | 2.120284000  |
| H | -0.621879000 | -2.063951000 | 2.613170000  |
| H | -2.004787000 | -1.952395000 | 1.515170000  |
| C | 1.056327000  | -3.507795000 | 0.965397000  |
| H | 1.732565000  | -3.629374000 | 0.113098000  |
| H | 1.604002000  | -3.009088000 | 1.772242000  |
| H | 0.768157000  | -4.504248000 | 1.320382000  |
| C | 3.049564000  | 0.510459000  | 0.025904000  |
| H | 4.014497000  | 0.007284000  | 0.155049000  |
| H | 3.094171000  | 0.961804000  | -0.971964000 |
| C | 2.793697000  | 1.524051000  | 1.144434000  |
| H | 2.386412000  | -0.414525000 | 0.120994000  |
| C | 3.868044000  | 2.608745000  | 1.188209000  |
| H | 3.675927000  | 3.317955000  | 1.998398000  |
| H | 4.859978000  | 2.173679000  | 1.351877000  |
| H | 3.901874000  | 3.174002000  | 0.250537000  |
| H | 1.809246000  | 1.999104000  | 1.021906000  |
| H | 2.751194000  | 0.993773000  | 2.102365000  |
| H | 0.808169000  | -1.316297000 | -2.946764000 |

## 2C

**E = -942.982931363**

|    |              |              |              |
|----|--------------|--------------|--------------|
| Mo | -0.199210000 | 0.415539000  | -0.809358000 |
| C  | 1.447373000  | 1.758338000  | -1.034553000 |
| H  | 1.593259000  | 1.781316000  | -2.126468000 |
| H  | 1.010919000  | 2.734584000  | -0.776802000 |
| C  | 2.813358000  | 1.607768000  | -0.332514000 |
| N  | -1.224375000 | 1.388283000  | -1.804617000 |
| O  | 0.757219000  | -0.959292000 | 0.256043000  |
| Si | 0.839320000  | -2.089662000 | 1.436156000  |
| C  | -1.402710000 | 0.598679000  | 0.931160000  |
| H  | -1.694089000 | -0.441802000 | 1.140306000  |
| C  | -2.598556000 | 1.540175000  | 1.145980000  |
| O  | 1.162941000  | -1.501462000 | 2.962044000  |
| H  | 2.105119000  | -1.454134000 | 3.151527000  |
| O  | 2.079805000  | -3.165518000 | 1.125048000  |
| H  | 2.189771000  | -3.352447000 | 0.187837000  |
| O  | -0.663484000 | -2.809478000 | 1.521487000  |
| H  | -0.788701000 | -3.316855000 | 2.329726000  |
| C  | 3.657946000  | 2.834382000  | -0.735931000 |
| H  | 4.652198000  | 2.787686000  | -0.275365000 |
| H  | 3.794175000  | 2.883135000  | -1.822328000 |
| H  | 3.183014000  | 3.768228000  | -0.414070000 |
| C  | 2.660780000  | 1.607024000  | 1.194532000  |
| H  | 2.140078000  | 2.509562000  | 1.537233000  |
| H  | 2.097465000  | 0.735929000  | 1.538736000  |
| H  | 3.643525000  | 1.591554000  | 1.680925000  |
| C  | 3.550007000  | 0.342746000  | -0.793892000 |
| H  | 3.002184000  | -0.557666000 | -0.507164000 |
| H  | 3.677092000  | 0.339709000  | -1.883529000 |
| H  | 4.549537000  | 0.293105000  | -0.346078000 |

|   |              |              |              |
|---|--------------|--------------|--------------|
| C | -2.213575000 | 3.006601000  | 0.909136000  |
| H | -3.058104000 | 3.670397000  | 1.128031000  |
| H | -1.382574000 | 3.302463000  | 1.560874000  |
| H | -1.905603000 | 3.175785000  | -0.126638000 |
| C | -3.032496000 | 1.384301000  | 2.618844000  |
| H | -3.891100000 | 2.029314000  | 2.841473000  |
| H | -3.321594000 | 0.350684000  | 2.839001000  |
| H | -2.220793000 | 1.657542000  | 3.302328000  |
| C | -3.782911000 | 1.149003000  | 0.253378000  |
| H | -3.532580000 | 1.241572000  | -0.806790000 |
| H | -4.085309000 | 0.111399000  | 0.436728000  |
| H | -4.649491000 | 1.789716000  | 0.453847000  |
| C | -0.420595000 | -1.185548000 | -2.204421000 |
| H | -0.466445000 | -0.767978000 | -3.215772000 |
| H | 0.500781000  | -1.772496000 | -2.101167000 |
| C | -1.648234000 | -2.047096000 | -1.910322000 |
| H | -1.595036000 | -2.439140000 | -0.887744000 |
| H | -2.554730000 | -1.430234000 | -1.966122000 |
| C | -1.783391000 | -3.218464000 | -2.889740000 |
| H | -1.869968000 | -2.863854000 | -3.922862000 |
| H | -0.910541000 | -3.878694000 | -2.837593000 |
| H | -2.670734000 | -3.820171000 | -2.665009000 |
| H | -0.609063000 | 0.839053000  | 1.660863000  |
| H | -1.919545000 | 1.805937000  | -2.415672000 |

## 2D

**E = -745.285648558**

|    |              |              |              |
|----|--------------|--------------|--------------|
| Mo | 0.228046000  | 0.310418000  | -0.943876000 |
| N  | 1.102649000  | 0.089079000  | -2.403173000 |
| O  | -1.665259000 | 0.015187000  | -0.747272000 |
| Si | -2.701889000 | -0.730125000 | 0.305251000  |
| C  | 1.254620000  | -0.560783000 | 0.348869000  |
| H  | 0.599526000  | -0.448542000 | 1.239827000  |
| C  | 2.508480000  | -1.354481000 | 0.618870000  |
| O  | -2.771218000 | -2.383383000 | 0.180688000  |
| H  | -3.364426000 | -2.690046000 | -0.512017000 |
| O  | -4.244049000 | -0.175680000 | 0.011771000  |
| H  | -4.265833000 | 0.734641000  | -0.299673000 |
| O  | -2.124620000 | -0.385685000 | 1.826911000  |
| H  | -2.506212000 | -0.936022000 | 2.517871000  |
| C  | 3.346854000  | -1.545997000 | -0.648370000 |
| H  | 4.258845000  | -2.108594000 | -0.418034000 |
| H  | 2.786473000  | -2.099024000 | -1.408348000 |
| H  | 3.632418000  | -0.582752000 | -1.080615000 |
| C  | 2.106005000  | -2.731255000 | 1.184836000  |
| H  | 2.998373000  | -3.323332000 | 1.420054000  |
| H  | 1.518241000  | -2.626279000 | 2.103313000  |
| H  | 1.504672000  | -3.290904000 | 0.461518000  |
| C  | 3.337036000  | -0.594402000 | 1.674937000  |
| H  | 3.640724000  | 0.387947000  | 1.300094000  |
| H  | 2.764864000  | -0.445109000 | 2.597271000  |
| H  | 4.242040000  | -1.159536000 | 1.927851000  |
| C  | 0.657661000  | 2.335738000  | -0.430649000 |
| H  | 1.689867000  | 2.584007000  | -0.699257000 |
| H  | 0.008898000  | 2.917274000  | -1.111257000 |
| C  | 0.372541000  | 2.712352000  | 1.024945000  |

|   |              |              |              |
|---|--------------|--------------|--------------|
| H | 1.091310000  | 2.194829000  | 1.672671000  |
| H | -0.619595000 | 2.353624000  | 1.332583000  |
| C | 0.451157000  | 4.221091000  | 1.276000000  |
| H | 0.260062000  | 4.462969000  | 2.327505000  |
| H | 1.442097000  | 4.610329000  | 1.016247000  |
| H | -0.284714000 | 4.761855000  | 0.669954000  |
| H | 1.367357000  | -0.193785000 | -3.339489000 |

**TS(2A-2B)**

**E = -823.827213853**

|    |              |              |              |
|----|--------------|--------------|--------------|
| Mo | -0.190004000 | 0.003224000  | 1.074375000  |
| C  | -2.374973000 | -0.620076000 | 0.630969000  |
| H  | -2.434003000 | -1.132470000 | 1.599091000  |
| H  | -3.199867000 | 0.102798000  | 0.657601000  |
| C  | -2.581568000 | -1.609032000 | -0.535501000 |
| N  | -0.294493000 | 0.561097000  | 2.742546000  |
| O  | 1.409619000  | -1.070255000 | 0.758465000  |
| Si | 2.628321000  | -1.028125000 | -0.345713000 |
| C  | -0.241260000 | 1.427180000  | 0.031201000  |
| H  | -1.576586000 | 0.530210000  | 0.162607000  |
| C  | -0.313243000 | 2.770035000  | -0.611026000 |
| O  | 2.153947000  | -1.258179000 | -1.929656000 |
| H  | 2.184908000  | -2.185911000 | -2.183865000 |
| O  | 3.671359000  | -2.295798000 | -0.031477000 |
| H  | 3.749804000  | -2.476400000 | 0.910936000  |
| O  | 3.357746000  | 0.465314000  | -0.261637000 |
| H  | 3.992375000  | 0.601975000  | -0.972168000 |
| C  | -3.954479000 | -2.275596000 | -0.341967000 |
| H  | -4.154598000 | -2.990479000 | -1.148245000 |
| H  | -4.002636000 | -2.819567000 | 0.608000000  |
| H  | -4.759840000 | -1.532579000 | -0.345832000 |
| C  | -2.562525000 | -0.868695000 | -1.880090000 |
| H  | -3.323625000 | -0.079659000 | -1.907912000 |
| H  | -1.585710000 | -0.411135000 | -2.069205000 |
| H  | -2.772013000 | -1.558978000 | -2.704448000 |
| C  | -1.493933000 | -2.693049000 | -0.531858000 |
| H  | -0.496504000 | -2.275755000 | -0.714794000 |
| H  | -1.466670000 | -3.228738000 | 0.424468000  |
| H  | -1.683591000 | -3.431176000 | -1.319310000 |
| C  | 0.945620000  | 3.537456000  | -0.156342000 |
| H  | 0.969536000  | 4.523084000  | -0.635509000 |
| H  | 0.946912000  | 3.679973000  | 0.928299000  |
| H  | 1.852730000  | 2.990444000  | -0.426241000 |
| C  | -1.578129000 | 3.517652000  | -0.151174000 |
| H  | -1.607056000 | 4.521290000  | -0.591031000 |
| H  | -2.486708000 | 2.991401000  | -0.464555000 |
| H  | -1.600712000 | 3.618979000  | 0.938045000  |
| C  | -0.308180000 | 2.631666000  | -2.144964000 |
| H  | 0.578461000  | 2.088126000  | -2.482821000 |
| H  | -1.192749000 | 2.090700000  | -2.495875000 |
| H  | -0.310535000 | 3.622238000  | -2.615236000 |
| H  | -0.341571000 | 1.458384000  | 3.225353000  |

TS(2A-2C)

E = -942.921851266

|    |              |              |              |
|----|--------------|--------------|--------------|
| Mo | 0.189755000  | -0.468576000 | -0.736477000 |
| C  | -1.691535000 | -1.476465000 | -1.236047000 |
| H  | -1.812989000 | -1.296704000 | -2.319118000 |
| H  | -1.385842000 | -2.531611000 | -1.161599000 |
| C  | -3.064987000 | -1.322835000 | -0.549286000 |
| N  | 1.084934000  | -1.471138000 | -1.817469000 |
| O  | -0.859386000 | 1.150570000  | -0.216188000 |
| Si | -1.069030000 | 2.304681000  | 0.916712000  |
| C  | 1.096494000  | -0.785857000 | 0.936082000  |
| H  | 1.629380000  | 0.326800000  | 0.033646000  |
| C  | 2.197019000  | -1.629550000 | 1.549537000  |
| O  | -1.216428000 | 1.724609000  | 2.478657000  |
| H  | -2.118988000 | 1.473892000  | 2.700219000  |
| O  | -2.469372000 | 3.169672000  | 0.634752000  |
| H  | -2.665646000 | 3.268493000  | -0.302150000 |
| O  | 0.292279000  | 3.272153000  | 0.941057000  |
| H  | 0.309162000  | 3.864837000  | 1.699414000  |
| C  | -3.950147000 | -2.511707000 | -0.974654000 |
| H  | -4.953615000 | -2.436262000 | -0.536522000 |
| H  | -4.062705000 | -2.547477000 | -2.064440000 |
| H  | -3.514854000 | -3.465085000 | -0.652565000 |
| C  | -2.925467000 | -1.353549000 | 0.979582000  |
| H  | -2.428122000 | -2.273846000 | 1.308605000  |
| H  | -2.332389000 | -0.507040000 | 1.337623000  |
| H  | -3.907872000 | -1.315522000 | 1.466971000  |
| C  | -3.766224000 | -0.030015000 | -0.987785000 |
| H  | -3.175552000 | 0.846507000  | -0.718047000 |
| H  | -3.914629000 | -0.021273000 | -2.074709000 |
| H  | -4.753808000 | 0.058932000  | -0.518535000 |
| C  | 1.497727000  | -2.647323000 | 2.474722000  |
| H  | 2.246684000  | -3.258783000 | 2.990913000  |
| H  | 0.889569000  | -2.145747000 | 3.235051000  |
| H  | 0.845842000  | -3.313197000 | 1.901378000  |
| C  | 3.107025000  | -0.719727000 | 2.398931000  |
| H  | 3.871824000  | -1.316149000 | 2.909204000  |
| H  | 3.618896000  | 0.020863000  | 1.775199000  |
| H  | 2.533282000  | -0.181228000 | 3.160699000  |
| C  | 3.038482000  | -2.378629000 | 0.514503000  |
| H  | 2.416987000  | -3.040245000 | -0.094441000 |
| H  | 3.552162000  | -1.685527000 | -0.158778000 |
| H  | 3.798862000  | -2.983780000 | 1.020552000  |
| C  | 1.708536000  | 1.260634000  | -1.224763000 |
| H  | 1.124259000  | 1.449953000  | -2.135507000 |
| H  | 1.574338000  | 2.139326000  | -0.589225000 |
| C  | 3.169129000  | 1.020228000  | -1.588663000 |
| H  | 3.763199000  | 0.869231000  | -0.676722000 |
| H  | 3.264617000  | 0.092815000  | -2.166488000 |
| C  | 3.765427000  | 2.182009000  | -2.385966000 |
| H  | 3.226767000  | 2.331714000  | -3.328589000 |
| H  | 3.708156000  | 3.118518000  | -1.821021000 |
| H  | 4.818192000  | 1.999553000  | -2.627905000 |
| H  | 0.551174000  | -0.204467000 | 1.698205000  |
| H  | 1.620202000  | -1.804201000 | -2.614357000 |

**TS(2A-2D)****E = -942.917510028**

|    |              |              |              |
|----|--------------|--------------|--------------|
| Mo | 0.095123000  | -0.005662000 | -0.823220000 |
| C  | 2.478742000  | -0.160532000 | -0.940582000 |
| H  | 2.733287000  | -0.644217000 | -1.893954000 |
| H  | 2.388778000  | 0.910174000  | -1.149241000 |
| C  | 3.644994000  | -0.350542000 | 0.062570000  |
| N  | -0.007843000 | 0.860401000  | -2.301335000 |
| O  | -1.663809000 | -0.928979000 | -0.712952000 |
| Si | -3.113290000 | -0.604758000 | -0.037141000 |
| C  | -0.004253000 | 1.300534000  | 0.516792000  |
| H  | -0.020586000 | 0.706460000  | 1.455032000  |
| C  | -0.205304000 | 2.781684000  | 0.744292000  |
| O  | -3.136592000 | -0.612258000 | 1.635614000  |
| H  | -3.334782000 | -1.487857000 | 1.982487000  |
| O  | -4.192652000 | -1.810351000 | -0.470702000 |
| H  | -4.017479000 | -2.146027000 | -1.355564000 |
| O  | -3.621788000 | 0.909974000  | -0.517154000 |
| H  | -4.423674000 | 1.185599000  | -0.061502000 |
| C  | 4.033168000  | -1.828309000 | 0.227064000  |
| H  | 4.953108000  | -1.913901000 | 0.816426000  |
| H  | 3.262155000  | -2.401795000 | 0.749694000  |
| H  | 4.216285000  | -2.304940000 | -0.743098000 |
| C  | 4.860772000  | 0.401131000  | -0.512912000 |
| H  | 5.139711000  | 0.008056000  | -1.497141000 |
| H  | 4.648254000  | 1.470095000  | -0.626583000 |
| H  | 5.730865000  | 0.299847000  | 0.146773000  |
| C  | 3.305467000  | 0.238326000  | 1.435351000  |
| H  | 3.046467000  | 1.297921000  | 1.359338000  |
| H  | 2.456995000  | -0.278063000 | 1.896691000  |
| H  | 4.160369000  | 0.147261000  | 2.115527000  |
| C  | -0.324529000 | 3.557105000  | -0.570967000 |
| H  | -0.473863000 | 4.623047000  | -0.364205000 |
| H  | 0.578962000  | 3.447194000  | -1.178386000 |
| H  | -1.169012000 | 3.192401000  | -1.161102000 |
| C  | 0.981352000  | 3.334133000  | 1.558773000  |
| H  | 0.804560000  | 4.386850000  | 1.808586000  |
| H  | 1.117335000  | 2.785393000  | 2.497094000  |
| H  | 1.913600000  | 3.276743000  | 0.987986000  |
| C  | -1.501838000 | 2.958918000  | 1.561900000  |
| H  | -2.356602000 | 2.552455000  | 1.015791000  |
| H  | -1.437766000 | 2.444486000  | 2.526997000  |
| H  | -1.680409000 | 4.023390000  | 1.756037000  |
| C  | 0.659910000  | -2.286109000 | -0.284542000 |
| H  | -0.116030000 | -2.612515000 | -0.984737000 |
| H  | 1.526377000  | -1.162034000 | -0.528887000 |
| C  | 0.254956000  | -2.575576000 | 1.161296000  |
| H  | -0.658187000 | -2.021215000 | 1.407641000  |
| H  | 1.034886000  | -2.214439000 | 1.845764000  |
| C  | 0.015601000  | -4.064883000 | 1.422267000  |
| H  | -0.264559000 | -4.247749000 | 2.465722000  |
| H  | -0.789790000 | -4.447433000 | 0.785874000  |
| H  | 0.914296000  | -4.654944000 | 1.209643000  |
| H  | 1.560943000  | -2.857636000 | -0.544031000 |
| H  | -0.074202000 | 1.016619000  | -3.302364000 |

**TS(2B-2D)****E = -745.224124015**

|    |              |              |              |
|----|--------------|--------------|--------------|
| Mo | 0.390669000  | 0.458265000  | -0.887382000 |
| N  | 0.846939000  | 0.264928000  | -2.578952000 |
| O  | -1.539716000 | 0.637757000  | -0.649809000 |
| Si | -2.668960000 | -0.155264000 | 0.246970000  |
| C  | 1.042896000  | -0.914249000 | 0.013353000  |
| C  | 1.692862000  | -2.133381000 | 0.568319000  |
| O  | -2.534687000 | -1.783416000 | -0.073033000 |
| H  | -3.088378000 | -2.315236000 | 0.507423000  |
| O  | -4.171804000 | 0.475266000  | -0.123911000 |
| H  | -4.237130000 | 0.735342000  | -1.048573000 |
| O  | -2.529183000 | 0.027359000  | 1.899070000  |
| H  | -2.998919000 | 0.804367000  | 2.217956000  |
| C  | 0.955532000  | -3.340595000 | -0.047386000 |
| H  | 1.357899000  | -4.270978000 | 0.369829000  |
| H  | -0.115599000 | -3.290279000 | 0.163992000  |
| H  | 1.084487000  | -3.364102000 | -1.133567000 |
| C  | 1.542199000  | -2.159180000 | 2.101681000  |
| H  | 1.983001000  | -3.075733000 | 2.511605000  |
| H  | 2.050663000  | -1.305852000 | 2.563343000  |
| H  | 0.487830000  | -2.120142000 | 2.388816000  |
| C  | 3.182056000  | -2.173568000 | 0.180568000  |
| H  | 3.304937000  | -2.148754000 | -0.906269000 |
| H  | 3.726393000  | -1.322471000 | 0.604963000  |
| H  | 3.649126000  | -3.089888000 | 0.559759000  |
| C  | 1.887936000  | 1.957379000  | -0.025421000 |
| H  | 2.887875000  | 1.771042000  | 0.387339000  |
| H  | 2.066271000  | 2.489006000  | -0.965479000 |
| C  | 1.066037000  | 2.777164000  | 0.977620000  |
| H  | 1.796506000  | 0.510267000  | 0.140053000  |
| C  | 1.802390000  | 4.040482000  | 1.430240000  |
| H  | 1.201507000  | 4.611621000  | 2.145082000  |
| H  | 2.751853000  | 3.788753000  | 1.915342000  |
| H  | 2.024452000  | 4.694387000  | 0.580284000  |
| H  | 0.100782000  | 3.063419000  | 0.538753000  |
| H  | 0.829349000  | 2.158428000  | 1.852491000  |
| H  | 1.337550000  | -0.431163000 | -3.140380000 |

**TS(2C-2D)****E = -942.918103453**

|    |              |              |              |
|----|--------------|--------------|--------------|
| Mo | 0.168777000  | -0.543054000 | -0.909815000 |
| C  | -2.045595000 | 0.318595000  | -1.212930000 |
| H  | -1.736914000 | 0.614595000  | -2.223555000 |
| H  | -2.730132000 | -0.524553000 | -1.355961000 |
| C  | -2.778032000 | 1.506826000  | -0.544709000 |
| N  | -0.230878000 | -1.736631000 | -2.090876000 |
| O  | 0.552511000  | 1.269852000  | -0.201207000 |
| Si | 1.331485000  | 2.138324000  | 0.941402000  |
| C  | -0.428504000 | -1.370069000 | 0.726018000  |
| H  | -0.122831000 | -0.696488000 | 1.543052000  |
| C  | -1.022958000 | -2.670913000 | 1.234159000  |
| O  | 0.762828000  | 3.690558000  | 1.146948000  |
| H  | 1.204756000  | 4.322937000  | 0.571905000  |
| O  | 2.953635000  | 2.333234000  | 0.594838000  |

|   |              |              |              |
|---|--------------|--------------|--------------|
| H | 3.338822000  | 1.568669000  | 0.154641000  |
| O | 1.045131000  | 1.344433000  | 2.385333000  |
| H | 1.267691000  | 1.877737000  | 3.154912000  |
| C | -4.227259000 | 1.480945000  | -1.070746000 |
| H | -4.795838000 | 2.331311000  | -0.676309000 |
| H | -4.253693000 | 1.541117000  | -2.164995000 |
| H | -4.746567000 | 0.563044000  | -0.770746000 |
| C | -2.806754000 | 1.389257000  | 0.984052000  |
| H | -3.283676000 | 0.454517000  | 1.302354000  |
| H | -1.797711000 | 1.425097000  | 1.404408000  |
| H | -3.380368000 | 2.213503000  | 1.422660000  |
| C | -2.145249000 | 2.846104000  | -0.947631000 |
| H | -1.121064000 | 2.928486000  | -0.583393000 |
| H | -2.137970000 | 2.960052000  | -2.038763000 |
| H | -2.724397000 | 3.678841000  | -0.532001000 |
| C | -1.626515000 | -3.540528000 | 0.128961000  |
| H | -2.016339000 | -4.470268000 | 0.558043000  |
| H | -2.454910000 | -3.030502000 | -0.373975000 |
| H | -0.879132000 | -3.793727000 | -0.626766000 |
| C | -2.102171000 | -2.360945000 | 2.289909000  |
| H | -2.476129000 | -3.291253000 | 2.732570000  |
| H | -1.704215000 | -1.737665000 | 3.097660000  |
| H | -2.954241000 | -1.836670000 | 1.845532000  |
| C | 0.135390000  | -3.432803000 | 1.911716000  |
| H | 0.913692000  | -3.683724000 | 1.185175000  |
| H | 0.591706000  | -2.838577000 | 2.710365000  |
| H | -0.238661000 | -4.363419000 | 2.353827000  |
| C | 2.292362000  | -0.521889000 | -1.457492000 |
| H | 2.429832000  | -1.062734000 | -2.401467000 |
| H | 2.553533000  | 0.528950000  | -1.652062000 |
| C | 3.236547000  | -1.120903000 | -0.405124000 |
| H | 3.103643000  | -0.625409000 | 0.567914000  |
| H | 2.969525000  | -2.171020000 | -0.230397000 |
| C | 4.714311000  | -1.047811000 | -0.805649000 |
| H | 4.889594000  | -1.581227000 | -1.746514000 |
| H | 5.038730000  | -0.010984000 | -0.958626000 |
| H | 5.363725000  | -1.489756000 | -0.041325000 |
| H | -1.422735000 | -0.497691000 | -0.011344000 |
| H | -0.487298000 | -2.234862000 | -2.938579000 |

### 3A

**E = -1482.33410116**

|    |              |              |              |
|----|--------------|--------------|--------------|
| Mo | -0.068552000 | 0.503851000  | 0.666550000  |
| C  | 0.477236000  | -0.475777000 | 2.491581000  |
| H  | -0.140406000 | 0.112113000  | 3.200281000  |
| H  | 0.049044000  | -1.485076000 | 2.495915000  |
| C  | 1.924984000  | -0.535424000 | 3.026017000  |
| N  | -1.556002000 | -0.279550000 | 0.256140000  |
| O  | 0.089818000  | 2.416043000  | 0.871322000  |
| Si | 0.865497000  | 3.681494000  | 0.146675000  |
| C  | 1.150449000  | -0.154562000 | -0.583980000 |
| H  | 2.025851000  | 0.486183000  | -0.348137000 |
| C  | 1.340859000  | -1.026542000 | -1.810834000 |
| O  | 2.461687000  | 3.386803000  | -0.230903000 |

|   |              |              |              |
|---|--------------|--------------|--------------|
| H | 3.061052000  | 3.613677000  | 0.487515000  |
| O | 0.891080000  | 4.975640000  | 1.195980000  |
| H | 0.093042000  | 5.048181000  | 1.729097000  |
| O | 0.066813000  | 3.973723000  | -1.279944000 |
| H | 0.550112000  | 4.559179000  | -1.871464000 |
| C | -2.805349000 | -0.671228000 | -0.182468000 |
| C | -3.286844000 | -1.954740000 | 0.187492000  |
| C | -3.578842000 | 0.198840000  | -0.997906000 |
| C | -4.549694000 | -2.339406000 | -0.263472000 |
| C | -4.831251000 | -0.244377000 | -1.422949000 |
| C | -5.317788000 | -1.497282000 | -1.060862000 |
| H | -4.939515000 | -3.315265000 | 0.010560000  |
| H | -5.439687000 | 0.400497000  | -2.049818000 |
| H | -6.297644000 | -1.818439000 | -1.403863000 |
| C | 1.869798000  | -0.911902000 | 4.519174000  |
| H | 2.878537000  | -0.994779000 | 4.942153000  |
| H | 1.324188000  | -0.158079000 | 5.098851000  |
| H | 1.366245000  | -1.874435000 | 4.663125000  |
| C | 2.734171000  | -1.603952000 | 2.282223000  |
| H | 2.287302000  | -2.595554000 | 2.420025000  |
| H | 2.774534000  | -1.403472000 | 1.208177000  |
| H | 3.762334000  | -1.646892000 | 2.660093000  |
| C | 2.621546000  | 0.827972000  | 2.897695000  |
| H | 2.749757000  | 1.119059000  | 1.848410000  |
| H | 2.046594000  | 1.615319000  | 3.399403000  |
| H | 3.619773000  | 0.800856000  | 3.350551000  |
| C | 0.349314000  | -2.195378000 | -1.786747000 |
| H | 0.455827000  | -2.817245000 | -2.682190000 |
| H | 0.488980000  | -2.822870000 | -0.901918000 |
| H | -0.671910000 | -1.809386000 | -1.759911000 |
| C | 1.036630000  | -0.167809000 | -3.064673000 |
| H | -0.003900000 | 0.169349000  | -3.039423000 |
| H | 1.674658000  | 0.717731000  | -3.120036000 |
| H | 1.194224000  | -0.759402000 | -3.973631000 |
| C | -3.070757000 | 1.582184000  | -1.357789000 |
| H | -1.975158000 | 1.536317000  | -1.372811000 |
| C | -2.468517000 | -2.851700000 | 1.096776000  |
| H | -1.419787000 | -2.562360000 | 0.965159000  |
| C | -2.840080000 | -2.593024000 | 2.566250000  |
| H | -3.889282000 | -2.849746000 | 2.751760000  |
| H | -2.220088000 | -3.198745000 | 3.236856000  |
| H | -2.699685000 | -1.540693000 | 2.830629000  |
| C | -2.588976000 | -4.340954000 | 0.758939000  |
| H | -1.880496000 | -4.919266000 | 1.361348000  |
| H | -3.588295000 | -4.733837000 | 0.976745000  |
| H | -2.372871000 | -4.533226000 | -0.296583000 |
| C | -3.514395000 | 2.064826000  | -2.741774000 |
| H | -4.589680000 | 2.271989000  | -2.782078000 |
| H | -2.996805000 | 2.997134000  | -2.988061000 |
| H | -3.281894000 | 1.330639000  | -3.519714000 |
| C | -3.474268000 | 2.597000000  | -0.275527000 |
| H | -3.048609000 | 3.580675000  | -0.498470000 |
| H | -4.564905000 | 2.694327000  | -0.226748000 |
| H | -3.119110000 | 2.289331000  | 0.712549000  |
| C | 2.805573000  | -1.497622000 | -1.868994000 |
| C | 3.840021000  | -0.553406000 | -1.972523000 |



|   |             |              |              |
|---|-------------|--------------|--------------|
| C | 3.164284000 | -2.849561000 | -1.831695000 |
| C | 5.174212000 | -0.943291000 | -2.038836000 |
| H | 3.603426000 | 0.507513000  | -2.003195000 |
| C | 4.501483000 | -3.244958000 | -1.897953000 |
| H | 2.398630000 | -3.613583000 | -1.750764000 |
| C | 5.513190000 | -2.295741000 | -2.002363000 |
| H | 5.951119000 | -0.187573000 | -2.120944000 |
| H | 4.747705000 | -4.303216000 | -1.867030000 |
| H | 6.553887000 | -2.603551000 | -2.054377000 |

### 3B

**E = -1284.54380307**

|    |              |              |              |
|----|--------------|--------------|--------------|
| Mo | 0.083594000  | 0.229055000  | 0.652478000  |
| N  | 1.552616000  | -0.507444000 | -0.025493000 |
| O  | -0.512830000 | 2.015045000  | 1.097691000  |
| Si | -1.904413000 | 2.913555000  | 0.984173000  |
| C  | -1.199080000 | -0.897278000 | 0.211502000  |
| C  | -1.796525000 | -2.115402000 | -0.411707000 |
| O  | -1.430224000 | 4.400428000  | 0.414476000  |
| H  | -2.172887000 | 4.948580000  | 0.142691000  |
| O  | -2.631505000 | 2.989472000  | 2.485056000  |
| H  | -2.005008000 | 3.166219000  | 3.193959000  |
| O  | -3.041148000 | 2.330891000  | -0.071502000 |
| H  | -3.410088000 | 1.473033000  | 0.170466000  |
| C  | 2.882825000  | -0.359962000 | -0.309128000 |
| C  | 3.302288000  | 0.300393000  | -1.500877000 |
| C  | 3.835927000  | -0.929712000 | 0.589527000  |
| C  | 4.668741000  | 0.362741000  | -1.767155000 |
| C  | 5.186296000  | -0.825018000 | 0.271088000  |
| C  | 5.605619000  | -0.185408000 | -0.894879000 |
| H  | 5.011480000  | 0.855685000  | -2.672281000 |
| H  | 5.928860000  | -1.251039000 | 0.938702000  |
| H  | 6.665530000  | -0.113921000 | -1.122382000 |
| C  | -1.175175000 | -2.339031000 | -1.809014000 |
| H  | -1.601315000 | -3.238102000 | -2.266901000 |
| H  | -1.369719000 | -1.492415000 | -2.471894000 |
| H  | -0.091812000 | -2.461322000 | -1.720011000 |
| C  | -1.455546000 | -3.321030000 | 0.483224000  |
| H  | -0.369324000 | -3.427326000 | 0.546941000  |
| H  | -1.845924000 | -3.195371000 | 1.497201000  |
| H  | -1.862654000 | -4.245921000 | 0.060046000  |
| C  | 3.345477000  | -1.601671000 | 1.856859000  |
| H  | 2.421003000  | -2.132568000 | 1.587043000  |
| C  | 2.283824000  | 0.935120000  | -2.427255000 |
| H  | 1.327865000  | 0.424323000  | -2.246283000 |
| C  | 2.082967000  | 2.420036000  | -2.080322000 |
| H  | 3.009916000  | 2.983538000  | -2.236114000 |
| H  | 1.305004000  | 2.863308000  | -2.711480000 |
| H  | 1.783024000  | 2.559550000  | -1.036692000 |
| C  | 2.621253000  | 0.766184000  | -3.912209000 |
| H  | 1.792113000  | 1.130225000  | -4.527806000 |
| H  | 3.509101000  | 1.340025000  | -4.200151000 |
| H  | 2.799498000  | -0.283064000 | -4.167211000 |
| C  | 4.325109000  | -2.622948000 | 2.438963000  |
| H  | 5.225189000  | -2.144496000 | 2.841164000  |
| H  | 3.853797000  | -3.165544000 | 3.264735000  |

|   |              |              |              |
|---|--------------|--------------|--------------|
| H | 4.636408000  | -3.354872000 | 1.687432000  |
| C | 2.966227000  | -0.563958000 | 2.928032000  |
| H | 2.559231000  | -1.054093000 | 3.819382000  |
| H | 3.836272000  | 0.030236000  | 3.229304000  |
| H | 2.210075000  | 0.142627000  | 2.559228000  |
| C | -3.309989000 | -1.869377000 | -0.542623000 |
| C | -4.266993000 | -2.714023000 | 0.026470000  |
| C | -3.759932000 | -0.750158000 | -1.260922000 |
| C | -5.631026000 | -2.454303000 | -0.122418000 |
| H | -3.959795000 | -3.585987000 | 0.593926000  |
| C | -5.119186000 | -0.487486000 | -1.408311000 |
| H | -3.034538000 | -0.070489000 | -1.701019000 |
| C | -6.063665000 | -1.342090000 | -0.837850000 |
| H | -6.355276000 | -3.127474000 | 0.328723000  |
| H | -5.439357000 | 0.387542000  | -1.967500000 |
| H | -7.125121000 | -1.139276000 | -0.949044000 |

### 3B'

**E = -1482.28994017**

|    |              |              |              |
|----|--------------|--------------|--------------|
| Mo | -0.053954000 | 0.199247000  | 0.951950000  |
| C  | 1.099020000  | -1.724356000 | 2.178108000  |
| H  | 1.057448000  | -0.874335000 | 2.876899000  |
| H  | 0.292874000  | -2.416108000 | 2.431901000  |
| C  | 2.496817000  | -2.380276000 | 2.269256000  |
| N  | -1.749966000 | -0.286501000 | 0.737317000  |
| O  | 0.070546000  | 2.021983000  | 1.642018000  |
| Si | 0.692890000  | 3.458927000  | 1.135429000  |
| C  | 0.685354000  | 0.149593000  | -0.632991000 |
| H  | 1.021640000  | -1.468497000 | 1.071045000  |
| C  | 1.002092000  | 0.007282000  | -2.087678000 |
| O  | 2.269196000  | 3.429971000  | 0.585715000  |
| H  | 2.907257000  | 3.520450000  | 1.300382000  |
| O  | 0.729654000  | 4.494567000  | 2.447083000  |
| H  | -0.028499000 | 4.373720000  | 3.027946000  |
| O  | -0.244420000 | 4.005516000  | -0.123805000 |
| H  | 0.140427000  | 4.764452000  | -0.573277000 |
| C  | -2.776142000 | -0.635090000 | -0.121822000 |
| C  | -3.049817000 | -2.005146000 | -0.384398000 |
| C  | -3.590472000 | 0.387253000  | -0.683818000 |
| C  | -4.132158000 | -2.321870000 | -1.206187000 |
| C  | -4.653042000 | 0.008560000  | -1.504627000 |
| C  | -4.929428000 | -1.329934000 | -1.768004000 |
| H  | -4.354195000 | -3.363456000 | -1.417980000 |
| H  | -5.280127000 | 0.776038000  | -1.948085000 |
| H  | -5.763689000 | -1.599112000 | -2.410079000 |
| C  | 2.668609000  | -2.939984000 | 3.688102000  |
| H  | 3.652606000  | -3.408526000 | 3.796059000  |
| H  | 2.592394000  | -2.148523000 | 4.442363000  |
| H  | 1.910732000  | -3.698275000 | 3.914149000  |
| C  | 2.592609000  | -3.515601000 | 1.241902000  |
| H  | 1.814376000  | -4.269785000 | 1.404507000  |
| H  | 2.493280000  | -3.135047000 | 0.219238000  |
| H  | 3.563408000  | -4.016696000 | 1.314578000  |
| C  | 3.570797000  | -1.323686000 | 1.984453000  |
| H  | 3.437725000  | -0.872430000 | 0.995059000  |
| H  | 3.543262000  | -0.521193000 | 2.731367000  |

|   |              |              |              |
|---|--------------|--------------|--------------|
| H | 4.569043000  | -1.772482000 | 2.016194000  |
| C | 0.530882000  | 1.294571000  | -2.807527000 |
| H | 0.773925000  | 1.228350000  | -3.873606000 |
| H | -0.550847000 | 1.412090000  | -2.697125000 |
| H | 1.014400000  | 2.181538000  | -2.393566000 |
| C | 0.222465000  | -1.189721000 | -2.661724000 |
| H | 0.374519000  | -1.278326000 | -3.743583000 |
| H | 0.526084000  | -2.129548000 | -2.190305000 |
| H | -0.845350000 | -1.050380000 | -2.477916000 |
| C | -3.319018000 | 1.845137000  | -0.355293000 |
| H | -2.231885000 | 1.980432000  | -0.322733000 |
| C | -2.204888000 | -3.087329000 | 0.265174000  |
| H | -1.170891000 | -2.718074000 | 0.271769000  |
| C | -2.632807000 | -3.296650000 | 1.727159000  |
| H | -3.664757000 | -3.661677000 | 1.774559000  |
| H | -1.993604000 | -4.037862000 | 2.223005000  |
| H | -2.582593000 | -2.359185000 | 2.289077000  |
| C | -2.203429000 | -4.418960000 | -0.489850000 |
| H | -1.476269000 | -5.104506000 | -0.041271000 |
| H | -3.179069000 | -4.915713000 | -0.445295000 |
| H | -1.939605000 | -4.286720000 | -1.543932000 |
| C | -3.859284000 | 2.831543000  | -1.392947000 |
| H | -4.954959000 | 2.871454000  | -1.394625000 |
| H | -3.497520000 | 3.838368000  | -1.162522000 |
| H | -3.528547000 | 2.578422000  | -2.405748000 |
| C | -3.860349000 | 2.186432000  | 1.043049000  |
| H | -3.617929000 | 3.222337000  | 1.305472000  |
| H | -4.950379000 | 2.073244000  | 1.073228000  |
| H | -3.425589000 | 1.529857000  | 1.801768000  |
| C | 2.525270000  | -0.133636000 | -2.246553000 |
| C | 3.369745000  | 0.818797000  | -1.654349000 |
| C | 3.111245000  | -1.166942000 | -2.984804000 |
| C | 4.751381000  | 0.741089000  | -1.805982000 |
| H | 2.938058000  | 1.622777000  | -1.062831000 |
| C | 4.497652000  | -1.246361000 | -3.134604000 |
| H | 2.490822000  | -1.921534000 | -3.457311000 |
| C | 5.324084000  | -0.293284000 | -2.547718000 |
| H | 5.384409000  | 1.493556000  | -1.342261000 |
| H | 4.927385000  | -2.058271000 | -3.715863000 |
| H | 6.402671000  | -0.353548000 | -2.665812000 |

### 3B''

**E = -1403.68316095**

|    |              |              |              |
|----|--------------|--------------|--------------|
| Mo | -0.098553000 | 0.248166000  | 0.960544000  |
| N  | 1.657392000  | 0.092613000  | 0.731650000  |
| O  | -0.598017000 | 2.127904000  | 1.142784000  |
| Si | -1.538726000 | 3.197476000  | 0.319857000  |
| C  | -0.856733000 | -0.393152000 | -0.479174000 |
| C  | -1.222162000 | -0.996316000 | -1.796606000 |
| O  | -0.818254000 | 3.490199000  | -1.149469000 |
| H  | -1.386951000 | 3.979182000  | -1.752383000 |
| O  | -1.716115000 | 4.564378000  | 1.265906000  |
| H  | -0.914840000 | 4.775685000  | 1.755875000  |
| O  | -3.103916000 | 2.708793000  | 0.004010000  |
| H  | -3.705920000 | 2.924457000  | 0.723099000  |
| C  | 2.703883000  | -0.271358000 | -0.097231000 |

|   |              |              |              |
|---|--------------|--------------|--------------|
| C | 3.249809000  | 0.688124000  | -0.993848000 |
| C | 3.263779000  | -1.574422000 | -0.001283000 |
| C | 4.336117000  | 0.310128000  | -1.783720000 |
| C | 4.357146000  | -1.889887000 | -0.808878000 |
| C | 4.891490000  | -0.963094000 | -1.698217000 |
| H | 4.759981000  | 1.026070000  | -2.481692000 |
| H | 4.796875000  | -2.881053000 | -0.749563000 |
| H | 5.738453000  | -1.232383000 | -2.323398000 |
| C | -1.151626000 | 0.115964000  | -2.871213000 |
| H | -1.439392000 | -0.296617000 | -3.844310000 |
| H | -1.820686000 | 0.944218000  | -2.630546000 |
| H | -0.133396000 | 0.509552000  | -2.939971000 |
| C | -0.203395000 | -2.093131000 | -2.155659000 |
| H | 0.804414000  | -1.671755000 | -2.145904000 |
| H | -0.231463000 | -2.917558000 | -1.436797000 |
| H | -0.396264000 | -2.497722000 | -3.155866000 |
| C | 2.704860000  | -2.570662000 | 0.999878000  |
| H | 1.615608000  | -2.431763000 | 1.007452000  |
| C | 2.679389000  | 2.095112000  | -1.045559000 |
| H | 1.592607000  | 2.017574000  | -0.928768000 |
| C | 3.204544000  | 2.925484000  | 0.137309000  |
| H | 4.292971000  | 3.040909000  | 0.075356000  |
| H | 2.755527000  | 3.925136000  | 0.134060000  |
| H | 2.964284000  | 2.444973000  | 1.089774000  |
| C | 2.933171000  | 2.823738000  | -2.366906000 |
| H | 2.369008000  | 3.761358000  | -2.381524000 |
| H | 3.990867000  | 3.077864000  | -2.503665000 |
| H | 2.614897000  | 2.226068000  | -3.227557000 |
| C | 2.968210000  | -4.035305000 | 0.642444000  |
| H | 4.030023000  | -4.292307000 | 0.726084000  |
| H | 2.426313000  | -4.693154000 | 1.330631000  |
| H | 2.643184000  | -4.267980000 | -0.376523000 |
| C | 3.223028000  | -2.259686000 | 2.413902000  |
| H | 2.775236000  | -2.932990000 | 3.155145000  |
| H | 4.310213000  | -2.388135000 | 2.458789000  |
| H | 2.997294000  | -1.227333000 | 2.697964000  |
| C | -0.726005000 | -1.490161000 | 2.698483000  |
| H | -0.734721000 | -2.576976000 | 2.840468000  |
| H | 0.242623000  | -1.158323000 | 3.089745000  |
| C | -1.920499000 | -0.828400000 | 3.390958000  |
| H | -0.831826000 | -1.496547000 | 1.559172000  |
| C | -1.925981000 | -1.096602000 | 4.894629000  |
| H | -2.788236000 | -0.623815000 | 5.373603000  |
| H | -1.975164000 | -2.170894000 | 5.102819000  |
| H | -1.021681000 | -0.704461000 | 5.372566000  |
| H | -1.914209000 | 0.257632000  | 3.220048000  |
| H | -2.845040000 | -1.200240000 | 2.935648000  |
| C | -2.664779000 | -1.521710000 | -1.699418000 |
| C | -3.679739000 | -0.664756000 | -1.245235000 |
| C | -3.016133000 | -2.824035000 | -2.068041000 |
| C | -5.000519000 | -1.097684000 | -1.171989000 |
| H | -3.428150000 | 0.347937000  | -0.939315000 |
| C | -4.341143000 | -3.259192000 | -1.992540000 |
| H | -2.258503000 | -3.514944000 | -2.423239000 |
| C | -5.339266000 | -2.399143000 | -1.545179000 |
| H | -5.770010000 | -0.413977000 | -0.822038000 |

|   |              |              |              |
|---|--------------|--------------|--------------|
| H | -4.588021000 | -4.275949000 | -2.287383000 |
| H | -6.370523000 | -2.736988000 | -1.487518000 |

### 3C

**E = -1601.4249815**

|    |              |              |              |
|----|--------------|--------------|--------------|
| Mo | -0.082769000 | 0.471334000  | -0.380107000 |
| C  | -0.593408000 | -1.096328000 | -1.738104000 |
| H  | 0.313792000  | -1.223013000 | -2.339266000 |
| H  | -0.646426000 | -1.963166000 | -1.056322000 |
| C  | -1.809860000 | -1.109639000 | -2.692891000 |
| N  | 1.600843000  | -0.013681000 | -0.265087000 |
| O  | -1.903797000 | 1.252548000  | -0.375755000 |
| Si | -3.241413000 | 2.060625000  | 0.108020000  |
| C  | -0.306247000 | 0.269398000  | 1.742808000  |
| H  | 0.549324000  | 0.835232000  | 2.136436000  |
| C  | -0.362308000 | -1.095508000 | 2.470511000  |
| O  | -4.654850000 | 1.179214000  | 0.139690000  |
| H  | -5.088624000 | 1.130854000  | -0.717838000 |
| O  | -3.572819000 | 3.332818000  | -0.926362000 |
| H  | -2.784621000 | 3.769528000  | -1.262505000 |
| O  | -2.976934000 | 2.537121000  | 1.685806000  |
| H  | -3.779418000 | 2.848858000  | 2.116599000  |
| C  | 2.953909000  | -0.220387000 | -0.087719000 |
| C  | 3.553625000  | -1.401960000 | -0.613031000 |
| C  | 3.752140000  | 0.728728000  | 0.612820000  |
| C  | 4.921940000  | -1.597690000 | -0.436521000 |
| C  | 5.116782000  | 0.474462000  | 0.760188000  |
| C  | 5.706350000  | -0.672267000 | 0.243671000  |
| H  | 5.384941000  | -2.493551000 | -0.840200000 |
| H  | 5.730976000  | 1.194481000  | 1.294747000  |
| H  | 6.771378000  | -0.845444000 | 0.370934000  |
| C  | -1.594896000 | -2.295268000 | -3.657355000 |
| H  | -2.441804000 | -2.387676000 | -4.348074000 |
| H  | -0.686359000 | -2.164325000 | -4.256592000 |
| H  | -1.506303000 | -3.240025000 | -3.109209000 |
| C  | -3.124005000 | -1.340121000 | -1.940882000 |
| H  | -3.096572000 | -2.282577000 | -1.383770000 |
| H  | -3.322006000 | -0.542496000 | -1.224467000 |
| H  | -3.962583000 | -1.393432000 | -2.646648000 |
| C  | -1.889299000 | 0.177927000  | -3.525444000 |
| H  | -2.111402000 | 1.041561000  | -2.892779000 |
| H  | -0.947277000 | 0.367014000  | -4.055422000 |
| H  | -2.680400000 | 0.100009000  | -4.280639000 |
| C  | -0.545026000 | -0.790369000 | 3.979343000  |
| H  | -0.620339000 | -1.721265000 | 4.552382000  |
| H  | 0.310094000  | -0.220781000 | 4.360761000  |
| H  | -1.450763000 | -0.205660000 | 4.163465000  |
| C  | 0.960719000  | -1.853935000 | 2.315546000  |
| H  | 1.140954000  | -2.167388000 | 1.284524000  |
| H  | 1.794734000  | -1.209739000 | 2.609776000  |
| H  | 0.987094000  | -2.741351000 | 2.957400000  |
| C  | 3.181204000  | 2.002627000  | 1.207578000  |
| H  | 2.115205000  | 2.025668000  | 0.967339000  |
| C  | 2.739887000  | -2.416409000 | -1.394317000 |
| H  | 1.688232000  | -2.240962000 | -1.152428000 |
| C  | 2.917228000  | -2.192432000 | -2.904549000 |

|   |              |              |              |
|---|--------------|--------------|--------------|
| H | 3.958591000  | -2.360489000 | -3.202324000 |
| H | 2.287280000  | -2.881937000 | -3.477533000 |
| H | 2.652761000  | -1.169131000 | -3.189840000 |
| C | 3.056188000  | -3.869081000 | -1.018586000 |
| H | 2.357720000  | -4.545693000 | -1.522377000 |
| H | 4.065762000  | -4.166149000 | -1.322527000 |
| H | 2.969344000  | -4.031912000 | 0.060093000  |
| C | 3.316305000  | 2.026106000  | 2.737063000  |
| H | 4.367518000  | 2.034348000  | 3.045710000  |
| H | 2.842437000  | 2.923223000  | 3.150546000  |
| H | 2.844752000  | 1.151440000  | 3.195331000  |
| C | 3.822014000  | 3.252820000  | 0.587679000  |
| H | 3.356343000  | 4.161042000  | 0.985550000  |
| H | 4.892875000  | 3.307467000  | 0.811803000  |
| H | 3.710791000  | 3.260132000  | -0.500827000 |
| C | 0.487315000  | 2.326332000  | -1.267136000 |
| H | 1.538367000  | 2.283103000  | -1.567850000 |
| H | -0.124489000 | 2.265869000  | -2.183584000 |
| C | 0.199555000  | 3.629213000  | -0.523652000 |
| H | -0.848483000 | 3.666782000  | -0.209305000 |
| H | 0.781239000  | 3.667614000  | 0.405645000  |
| C | 0.528022000  | 4.868103000  | -1.363465000 |
| H | 1.585354000  | 4.883788000  | -1.648304000 |
| H | -0.059242000 | 4.887940000  | -2.289052000 |
| H | 0.316252000  | 5.790125000  | -0.811042000 |
| H | -1.208430000 | 0.848943000  | 1.958044000  |
| C | -1.569037000 | -1.930544000 | 2.019314000  |
| C | -2.856778000 | -1.372763000 | 2.045705000  |
| C | -1.455293000 | -3.274168000 | 1.639308000  |
| C | -3.980544000 | -2.123217000 | 1.713725000  |
| H | -2.990085000 | -0.333161000 | 2.330482000  |
| C | -2.580174000 | -4.032475000 | 1.307951000  |
| H | -0.481231000 | -3.751215000 | 1.608962000  |
| C | -3.849244000 | -3.462275000 | 1.346382000  |
| H | -4.958761000 | -1.651743000 | 1.733547000  |
| H | -2.457758000 | -5.074956000 | 1.024670000  |
| H | -4.725754000 | -4.051687000 | 1.091146000  |

### 3D

**E = -1403.73223872**

|    |              |              |              |
|----|--------------|--------------|--------------|
| Mo | 0.095699000  | -0.911835000 | -0.347784000 |
| N  | 1.025763000  | 0.534055000  | -0.145119000 |
| O  | -0.302126000 | -2.301274000 | 0.932333000  |
| Si | 0.468752000  | -3.236566000 | 2.056188000  |
| C  | -1.475798000 | -0.341133000 | -1.186686000 |
| H  | -2.074653000 | -1.275425000 | -1.187389000 |
| C  | -2.221648000 | 0.843839000  | -1.766882000 |
| O  | 0.839286000  | -4.768297000 | 1.534364000  |
| H  | 0.111459000  | -5.389872000 | 1.633049000  |
| O  | -0.519500000 | -3.425543000 | 3.383033000  |
| H  | -1.107859000 | -2.677562000 | 3.526149000  |
| O  | 1.913321000  | -2.473441000 | 2.368214000  |
| H  | 2.545782000  | -3.011639000 | 2.854147000  |
| C  | 1.756718000  | 1.618106000  | 0.303659000  |
| C  | 2.824960000  | 2.100090000  | -0.497187000 |
| C  | 1.430885000  | 2.237602000  | 1.538967000  |

|   |              |              |              |
|---|--------------|--------------|--------------|
| C | 3.570563000  | 3.179744000  | -0.024562000 |
| C | 2.210580000  | 3.317012000  | 1.956953000  |
| C | 3.274276000  | 3.785137000  | 1.192489000  |
| H | 4.398316000  | 3.554968000  | -0.619606000 |
| H | 1.981359000  | 3.800974000  | 2.902378000  |
| H | 3.868273000  | 4.624883000  | 1.542718000  |
| C | -1.312105000 | 2.073715000  | -1.843796000 |
| H | -1.846825000 | 2.927652000  | -2.273423000 |
| H | -0.921557000 | 2.357842000  | -0.864009000 |
| H | -0.452291000 | 1.852208000  | -2.481476000 |
| C | -2.658416000 | 0.484471000  | -3.207175000 |
| H | -1.777081000 | 0.300487000  | -3.829850000 |
| H | -3.284624000 | -0.411606000 | -3.237159000 |
| H | -3.229285000 | 1.309562000  | -3.646876000 |
| C | 0.285611000  | 1.741011000  | 2.403168000  |
| H | -0.341572000 | 1.096550000  | 1.774877000  |
| C | 3.177510000  | 1.421188000  | -1.807243000 |
| H | 2.290119000  | 0.860957000  | -2.119833000 |
| C | 3.522162000  | 2.409879000  | -2.926614000 |
| H | 4.457647000  | 2.945709000  | -2.731562000 |
| H | 3.651338000  | 1.874772000  | -3.873532000 |
| H | 2.731139000  | 3.154145000  | -3.062540000 |
| C | 4.313897000  | 0.408121000  | -1.597415000 |
| H | 4.537040000  | -0.124370000 | -2.528678000 |
| H | 5.229417000  | 0.913230000  | -1.268752000 |
| H | 4.047866000  | -0.331774000 | -0.836512000 |
| C | 0.811066000  | 0.892757000  | 3.571541000  |
| H | 1.459655000  | 1.490135000  | 4.222494000  |
| H | -0.021128000 | 0.522667000  | 4.182263000  |
| H | 1.387003000  | 0.032570000  | 3.218392000  |
| C | -0.610724000 | 2.877641000  | 2.910373000  |
| H | -1.486313000 | 2.465966000  | 3.423176000  |
| H | -0.088663000 | 3.522380000  | 3.625819000  |
| H | -0.964489000 | 3.506629000  | 2.087927000  |
| C | 1.048762000  | -1.863163000 | -2.000838000 |
| H | 1.366083000  | -1.134399000 | -2.754353000 |
| H | 1.969586000  | -2.282385000 | -1.557388000 |
| C | 0.223315000  | -2.974712000 | -2.655161000 |
| H | -0.637085000 | -2.525118000 | -3.167367000 |
| H | -0.192187000 | -3.646607000 | -1.891154000 |
| C | 1.033653000  | -3.808449000 | -3.651841000 |
| H | 0.416200000  | -4.582089000 | -4.121935000 |
| H | 1.444315000  | -3.176879000 | -4.447715000 |
| H | 1.874383000  | -4.306781000 | -3.156673000 |
| C | -3.469235000 | 1.086779000  | -0.895021000 |
| C | -4.462599000 | 0.099979000  | -0.792736000 |
| C | -3.660935000 | 2.273077000  | -0.177510000 |
| C | -5.598255000 | 0.290159000  | -0.011293000 |
| H | -4.352168000 | -0.837183000 | -1.332230000 |
| C | -4.798891000 | 2.469111000  | 0.606556000  |
| H | -2.920694000 | 3.063986000  | -0.227716000 |
| C | -5.773628000 | 1.480013000  | 0.694914000  |
| H | -6.349357000 | -0.493526000 | 0.044163000  |
| H | -4.919697000 | 3.403785000  | 1.148118000  |
| H | -6.659859000 | 1.632375000  | 1.304660000  |

**TS(3A-3B)****E = -1482.27558317**

|    |              |              |              |
|----|--------------|--------------|--------------|
| Mo | 0.023488000  | 0.323538000  | 0.689955000  |
| C  | 0.991636000  | -1.330041000 | 1.985769000  |
| H  | 0.053953000  | -1.713886000 | 2.400947000  |
| H  | 1.528628000  | -2.219683000 | 1.627451000  |
| C  | 1.864387000  | -0.646252000 | 3.065241000  |
| N  | -1.710322000 | -0.037651000 | 0.646418000  |
| O  | 0.361486000  | 2.239320000  | 0.885644000  |
| Si | 1.183974000  | 3.372991000  | 0.023036000  |
| C  | 0.756154000  | -0.297664000 | -0.795468000 |
| H  | 1.091476000  | -1.056959000 | 0.567240000  |
| C  | 1.131317000  | -0.963778000 | -2.078435000 |
| O  | 2.781606000  | 3.013195000  | -0.304974000 |
| H  | 3.375542000  | 3.337937000  | 0.379235000  |
| O  | 1.252096000  | 4.776508000  | 0.926996000  |
| H  | 0.450201000  | 4.921764000  | 1.439469000  |
| O  | 0.412640000  | 3.553638000  | -1.438613000 |
| H  | 0.912054000  | 4.090316000  | -2.061977000 |
| C  | -2.837106000 | -0.455581000 | -0.038847000 |
| C  | -3.286377000 | -1.797954000 | 0.087270000  |
| C  | -3.566144000 | 0.483299000  | -0.819860000 |
| C  | -4.453365000 | -2.173813000 | -0.578829000 |
| C  | -4.720217000 | 0.046240000  | -1.470181000 |
| C  | -5.167094000 | -1.266937000 | -1.355753000 |
| H  | -4.809623000 | -3.196022000 | -0.494690000 |
| H  | -5.283052000 | 0.746623000  | -2.079513000 |
| H  | -6.070261000 | -1.582644000 | -1.870917000 |
| C  | 2.349403000  | -1.740587000 | 4.032249000  |
| H  | 2.966415000  | -1.306889000 | 4.827573000  |
| H  | 1.506046000  | -2.255359000 | 4.505776000  |
| H  | 2.954611000  | -2.490312000 | 3.510553000  |
| C  | 3.082477000  | 0.033041000  | 2.420730000  |
| H  | 3.670689000  | -0.678913000 | 1.831831000  |
| H  | 2.788078000  | 0.850453000  | 1.751972000  |
| H  | 3.736354000  | 0.455425000  | 3.192132000  |
| C  | 1.049117000  | 0.386220000  | 3.860221000  |
| H  | 0.734800000  | 1.237730000  | 3.243742000  |
| H  | 0.154013000  | -0.067802000 | 4.300032000  |
| H  | 1.651174000  | 0.796594000  | 4.678525000  |
| C  | 0.991597000  | 0.092508000  | -3.201950000 |
| H  | 1.283473000  | -0.353115000 | -4.158672000 |
| H  | -0.045330000 | 0.433733000  | -3.271974000 |
| H  | 1.624324000  | 0.961545000  | -3.011667000 |
| C  | 0.156585000  | -2.120226000 | -2.366366000 |
| H  | 0.353106000  | -2.567279000 | -3.347442000 |
| H  | 0.226792000  | -2.905453000 | -1.607503000 |
| H  | -0.868043000 | -1.741343000 | -2.361600000 |
| C  | -3.107750000 | 1.929348000  | -0.900417000 |
| H  | -2.012299000 | 1.927404000  | -0.943124000 |
| C  | -2.527046000 | -2.772003000 | 0.970971000  |
| H  | -1.460033000 | -2.559640000 | 0.827557000  |
| C  | -2.853472000 | -2.518060000 | 2.452187000  |
| H  | -3.914865000 | -2.706879000 | 2.648316000  |
| H  | -2.269219000 | -3.180445000 | 3.102549000  |
| H  | -2.640707000 | -1.481115000 | 2.729201000  |



|   |              |              |              |
|---|--------------|--------------|--------------|
| C | -2.748733000 | -4.244449000 | 0.617676000  |
| H | -2.073314000 | -4.876030000 | 1.204720000  |
| H | -3.769574000 | -4.571592000 | 0.845206000  |
| H | -2.559859000 | -4.439925000 | -0.442761000 |
| C | -3.599248000 | 2.673095000  | -2.144628000 |
| H | -4.681309000 | 2.847525000  | -2.121439000 |
| H | -3.113960000 | 3.652400000  | -2.201792000 |
| H | -3.363692000 | 2.126761000  | -3.063899000 |
| C | -3.512135000 | 2.687282000  | 0.375083000  |
| H | -3.138659000 | 3.717200000  | 0.345133000  |
| H | -4.603415000 | 2.724573000  | 0.472120000  |
| H | -3.104767000 | 2.200354000  | 1.265408000  |
| C | 2.597518000  | -1.418518000 | -1.980181000 |
| C | 3.583358000  | -0.491295000 | -1.606698000 |
| C | 2.996937000  | -2.728072000 | -2.266481000 |
| C | 4.922601000  | -0.863046000 | -1.531990000 |
| H | 3.294812000  | 0.528025000  | -1.362636000 |
| C | 4.340409000  | -3.101656000 | -2.189474000 |
| H | 2.263583000  | -3.472703000 | -2.558025000 |
| C | 5.308858000  | -2.172226000 | -1.822968000 |
| H | 5.668099000  | -0.126056000 | -1.244636000 |
| H | 4.624982000  | -4.125131000 | -2.419540000 |
| H | 6.354281000  | -2.462620000 | -1.764042000 |

### TS(3A-3C)

**E = -1601.36229395**

|    |              |              |              |
|----|--------------|--------------|--------------|
| Mo | -0.092946000 | -0.659385000 | 0.012216000  |
| C  | 0.012307000  | -0.271500000 | 2.178315000  |
| H  | 1.045882000  | -0.526124000 | 2.465818000  |
| H  | -0.005551000 | 0.830902000  | 2.157264000  |
| C  | -0.928162000 | -0.738483000 | 3.305863000  |
| N  | 1.449598000  | 0.156437000  | -0.101472000 |
| O  | -1.270273000 | -2.234132000 | 0.430387000  |
| Si | -2.681164000 | -2.955096000 | 0.053175000  |
| C  | -1.330959000 | 0.345631000  | -1.074775000 |
| H  | -0.633926000 | -0.806444000 | -1.716277000 |
| C  | -1.484625000 | 1.516929000  | -2.034790000 |
| O  | -3.960681000 | -1.887466000 | -0.142043000 |
| H  | -4.401658000 | -1.691380000 | 0.691240000  |
| O  | -3.181929000 | -4.005740000 | 1.251109000  |
| H  | -2.452507000 | -4.437771000 | 1.706178000  |
| O  | -2.517452000 | -3.718541000 | -1.423658000 |
| H  | -3.353649000 | -4.065707000 | -1.751086000 |
| C  | 2.751210000  | 0.579207000  | 0.096356000  |
| C  | 2.993993000  | 1.933137000  | 0.464618000  |
| C  | 3.837314000  | -0.337149000 | -0.024983000 |
| C  | 4.313767000  | 2.337877000  | 0.674142000  |
| C  | 5.131514000  | 0.129988000  | 0.195000000  |
| C  | 5.377216000  | 1.456086000  | 0.537011000  |
| H  | 4.509397000  | 3.367895000  | 0.959840000  |
| H  | 5.966989000  | -0.556724000 | 0.101790000  |
| H  | 6.395411000  | 1.796787000  | 0.703740000  |
| C  | -0.539801000 | 0.012558000  | 4.596091000  |
| H  | -1.166440000 | -0.301794000 | 5.440669000  |
| H  | 0.505216000  | -0.180882000 | 4.865172000  |
| H  | -0.660028000 | 1.095581000  | 4.475521000  |

|   |              |              |              |
|---|--------------|--------------|--------------|
| C | -2.389723000 | -0.397424000 | 2.985774000  |
| H | -2.509242000 | 0.680249000  | 2.821928000  |
| H | -2.721001000 | -0.910747000 | 2.080685000  |
| H | -3.053964000 | -0.687152000 | 3.809282000  |
| C | -0.767568000 | -2.242244000 | 3.568300000  |
| H | -0.990402000 | -2.813520000 | 2.666115000  |
| H | 0.261266000  | -2.471548000 | 3.872542000  |
| H | -1.433166000 | -2.575180000 | 4.374256000  |
| C | -2.336595000 | 1.058631000  | -3.243457000 |
| H | -2.505936000 | 1.899763000  | -3.923934000 |
| H | -1.820977000 | 0.267399000  | -3.798794000 |
| H | -3.310687000 | 0.671224000  | -2.933742000 |
| C | -0.130715000 | 1.995370000  | -2.561838000 |
| H | 0.539055000  | 2.295283000  | -1.755252000 |
| H | 0.360358000  | 1.187271000  | -3.109802000 |
| H | -0.256521000 | 2.836037000  | -3.251757000 |
| C | 3.598069000  | -1.804735000 | -0.323782000 |
| H | 2.668148000  | -1.865902000 | -0.893776000 |
| C | 1.878633000  | 2.939373000  | 0.684805000  |
| H | 0.935766000  | 2.462627000  | 0.400495000  |
| C | 1.771072000  | 3.323158000  | 2.169285000  |
| H | 2.678203000  | 3.832306000  | 2.514234000  |
| H | 0.925699000  | 4.002044000  | 2.326329000  |
| H | 1.621568000  | 2.441702000  | 2.798725000  |
| C | 2.059565000  | 4.196221000  | -0.178392000 |
| H | 1.205676000  | 4.869189000  | -0.048223000 |
| H | 2.958716000  | 4.754888000  | 0.103565000  |
| H | 2.145338000  | 3.950663000  | -1.241560000 |
| C | 4.695473000  | -2.448732000 | -1.177510000 |
| H | 5.640540000  | -2.544485000 | -0.631994000 |
| H | 4.394701000  | -3.460281000 | -1.469222000 |
| H | 4.887402000  | -1.875025000 | -2.089488000 |
| C | 3.396542000  | -2.593248000 | 0.981280000  |
| H | 3.170668000  | -3.644103000 | 0.767732000  |
| H | 4.302650000  | -2.559904000 | 1.596502000  |
| H | 2.575662000  | -2.182954000 | 1.577134000  |
| C | 0.259999000  | -2.063197000 | -1.870661000 |
| H | 0.866932000  | -2.722097000 | -1.237969000 |
| H | -0.625186000 | -2.651685000 | -2.126973000 |
| C | 1.044513000  | -1.636394000 | -3.107839000 |
| H | 0.399000000  | -1.042251000 | -3.769295000 |
| H | 1.873654000  | -0.975542000 | -2.826659000 |
| C | 1.581309000  | -2.834568000 | -3.893519000 |
| H | 2.268552000  | -3.431994000 | -3.284366000 |
| H | 0.765555000  | -3.493158000 | -4.210595000 |
| H | 2.122790000  | -2.512824000 | -4.789858000 |
| H | -2.302717000 | -0.123625000 | -0.842663000 |
| C | -2.252289000 | 2.613707000  | -1.272476000 |
| C | -1.736567000 | 3.903187000  | -1.104775000 |
| C | -3.521575000 | 2.342925000  | -0.737003000 |
| C | -2.459156000 | 4.887475000  | -0.428604000 |
| H | -0.762394000 | 4.156462000  | -1.507499000 |
| C | -4.242878000 | 3.321391000  | -0.059165000 |
| H | -3.959643000 | 1.354505000  | -0.847211000 |
| C | -3.714379000 | 4.602178000  | 0.099411000  |
| H | -2.034435000 | 5.881987000  | -0.319113000 |

|   |              |             |             |
|---|--------------|-------------|-------------|
| H | -5.223214000 | 3.081881000 | 0.344110000 |
| H | -4.277033000 | 5.367535000 | 0.626580000 |

**TS(3A-3D)**

**E = -1601.36260725**

|    |              |              |              |
|----|--------------|--------------|--------------|
| Mo | 0.127922000  | -0.440697000 | 0.541799000  |
| C  | -1.534799000 | 0.773628000  | 1.771874000  |
| H  | -1.032585000 | 1.451840000  | 2.473108000  |
| H  | -1.634196000 | 1.302687000  | 0.819080000  |
| C  | -2.964546000 | 0.463804000  | 2.286701000  |
| N  | 1.116920000  | 0.919719000  | 0.125967000  |
| O  | 1.352528000  | -2.013874000 | 0.430755000  |
| Si | 1.503263000  | -3.299769000 | -0.562198000 |
| C  | -0.977149000 | -0.716175000 | -0.956032000 |
| H  | -1.551901000 | -1.633551000 | -0.711314000 |
| C  | -1.302210000 | -0.169121000 | -2.335707000 |
| O  | 0.138721000  | -4.258822000 | -0.712031000 |
| H  | 0.129903000  | -4.972714000 | -0.066503000 |
| O  | 2.673299000  | -4.329376000 | 0.049472000  |
| H  | 3.359757000  | -3.851513000 | 0.525806000  |
| O  | 1.871595000  | -2.770962000 | -2.102497000 |
| H  | 1.834963000  | -3.484249000 | -2.747982000 |
| C  | 2.135614000  | 1.856525000  | 0.010751000  |
| C  | 1.915681000  | 3.194344000  | 0.433235000  |
| C  | 3.384865000  | 1.473803000  | -0.549973000 |
| C  | 2.962930000  | 4.109430000  | 0.322319000  |
| C  | 4.392613000  | 2.435365000  | -0.636021000 |
| C  | 4.196815000  | 3.741030000  | -0.200885000 |
| H  | 2.806697000  | 5.132862000  | 0.653018000  |
| H  | 5.354203000  | 2.151147000  | -1.054721000 |
| H  | 4.999487000  | 4.469538000  | -0.275700000 |
| C  | -2.951191000 | 0.052684000  | 3.767311000  |
| H  | -3.976601000 | -0.047015000 | 4.140940000  |
| H  | -2.453970000 | -0.908174000 | 3.927247000  |
| H  | -2.445541000 | 0.804252000  | 4.384963000  |
| C  | -3.786961000 | 1.759320000  | 2.156906000  |
| H  | -3.328977000 | 2.577812000  | 2.724242000  |
| H  | -3.866582000 | 2.071373000  | 1.110057000  |
| H  | -4.803459000 | 1.614155000  | 2.542193000  |
| C  | -3.636538000 | -0.632716000 | 1.454114000  |
| H  | -3.682566000 | -0.358600000 | 0.396635000  |
| H  | -3.099766000 | -1.584686000 | 1.534695000  |
| H  | -4.662061000 | -0.803421000 | 1.801989000  |
| C  | -0.393172000 | 1.011570000  | -2.694600000 |
| H  | -0.671120000 | 1.427616000  | -3.668925000 |
| H  | -0.427944000 | 1.806961000  | -1.946476000 |
| H  | 0.643104000  | 0.669226000  | -2.745340000 |
| C  | -1.043269000 | -1.287653000 | -3.371904000 |
| H  | 0.014172000  | -1.561314000 | -3.351412000 |
| H  | -1.618461000 | -2.193254000 | -3.162766000 |
| H  | -1.307628000 | -0.938004000 | -4.376075000 |
| C  | 3.652512000  | 0.060305000  | -1.029355000 |
| H  | 2.696559000  | -0.464353000 | -1.076983000 |
| C  | 0.589571000  | 3.643269000  | 1.017162000  |
| H  | -0.118980000 | 2.823677000  | 0.877453000  |
| C  | 0.713942000  | 3.902256000  | 2.526125000  |

|   |              |              |              |
|---|--------------|--------------|--------------|
| H | 1.413068000  | 4.721229000  | 2.729521000  |
| H | -0.255877000 | 4.177207000  | 2.955968000  |
| H | 1.083208000  | 3.015739000  | 3.052036000  |
| C | 0.017486000  | 4.869482000  | 0.293334000  |
| H | -0.976541000 | 5.112334000  | 0.684742000  |
| H | 0.647233000  | 5.755331000  | 0.429480000  |
| H | -0.074105000 | 4.689452000  | -0.782353000 |
| C | 4.262792000  | 0.019883000  | -2.436037000 |
| H | 5.282534000  | 0.420460000  | -2.458279000 |
| H | 4.304030000  | -1.015458000 | -2.787739000 |
| H | 3.661585000  | 0.594393000  | -3.147655000 |
| C | 4.539556000  | -0.694017000 | -0.027351000 |
| H | 4.716077000  | -1.718733000 | -0.374402000 |
| H | 5.515537000  | -0.207238000 | 0.083482000  |
| H | 4.070066000  | -0.740878000 | 0.959757000  |
| C | 0.021417000  | -1.433351000 | 2.749738000  |
| H | 1.115646000  | -1.466312000 | 2.688066000  |
| H | -0.807659000 | -0.381969000 | 2.154968000  |
| C | -0.562195000 | -2.843751000 | 2.784457000  |
| H | -0.370574000 | -3.346434000 | 1.830258000  |
| H | -1.653966000 | -2.792226000 | 2.890581000  |
| C | 0.005099000  | -3.695275000 | 3.923023000  |
| H | -0.442795000 | -4.695446000 | 3.937009000  |
| H | 1.089069000  | -3.814387000 | 3.819361000  |
| H | -0.185390000 | -3.231193000 | 4.897447000  |
| H | -0.210747000 | -0.905683000 | 3.685600000  |
| C | -2.791869000 | 0.227281000  | -2.330378000 |
| C | -3.202187000 | 1.565856000  | -2.273661000 |
| C | -3.794138000 | -0.755171000 | -2.359162000 |
| C | -4.554562000 | 1.909737000  | -2.255416000 |
| H | -2.463602000 | 2.359806000  | -2.256699000 |
| C | -5.144878000 | -0.416458000 | -2.341539000 |
| H | -3.521338000 | -1.805672000 | -2.396186000 |
| C | -5.534060000 | 0.921057000  | -2.289863000 |
| H | -4.838959000 | 2.958307000  | -2.220353000 |
| H | -5.894965000 | -1.202461000 | -2.370017000 |
| H | -6.587087000 | 1.188142000  | -2.278941000 |

**TS(3B-3D)**

**E = -1403.67256078**

|    |              |              |              |
|----|--------------|--------------|--------------|
| Mo | -0.076265000 | 0.326876000  | 0.855311000  |
| N  | 1.656129000  | -0.016895000 | 0.721223000  |
| O  | -0.441605000 | 2.225380000  | 1.134561000  |
| Si | -1.314322000 | 3.370139000  | 0.336391000  |
| C  | -0.883265000 | -0.291199000 | -0.593367000 |
| C  | -1.335733000 | -0.961489000 | -1.848064000 |
| O  | -0.606597000 | 3.597686000  | -1.151136000 |
| H  | -1.140684000 | 4.141061000  | -1.739019000 |
| O  | -1.360924000 | 4.749219000  | 1.278206000  |
| H  | -0.539690000 | 4.892013000  | 1.759844000  |
| O  | -2.918303000 | 2.997054000  | 0.060928000  |
| H  | -3.485057000 | 3.265733000  | 0.790899000  |
| C  | 2.751394000  | -0.435331000 | -0.012716000 |
| C  | 3.415102000  | 0.489213000  | -0.864919000 |
| C  | 3.234844000  | -1.763117000 | 0.135568000  |
| C  | 4.544854000  | 0.053711000  | -1.557735000 |

|   |              |              |              |
|---|--------------|--------------|--------------|
| C | 4.374992000  | -2.137692000 | -0.576250000 |
| C | 5.028040000  | -1.244216000 | -1.419331000 |
| H | 5.059206000  | 0.742900000  | -2.220528000 |
| H | 4.757950000  | -3.148769000 | -0.475843000 |
| H | 5.911251000  | -1.558931000 | -1.968553000 |
| C | -1.313313000 | 0.098698000  | -2.975957000 |
| H | -1.656704000 | -0.356849000 | -3.910630000 |
| H | -1.961834000 | 0.944627000  | -2.739964000 |
| H | -0.296854000 | 0.476528000  | -3.119953000 |
| C | -0.358642000 | -2.093256000 | -2.214418000 |
| H | 0.652981000  | -1.688282000 | -2.293131000 |
| H | -0.346474000 | -2.877743000 | -1.451603000 |
| H | -0.622712000 | -2.547807000 | -3.175935000 |
| C | 2.541114000  | -2.721080000 | 1.088492000  |
| H | 1.464215000  | -2.529568000 | 0.998932000  |
| C | 2.916232000  | 1.919564000  | -0.975471000 |
| H | 1.820636000  | 1.890249000  | -0.943793000 |
| C | 3.384249000  | 2.742911000  | 0.236012000  |
| H | 4.478039000  | 2.812580000  | 0.255066000  |
| H | 2.979027000  | 3.759983000  | 0.188896000  |
| H | 3.053962000  | 2.285537000  | 1.172773000  |
| C | 3.304873000  | 2.618151000  | -2.280813000 |
| H | 2.788419000  | 3.580666000  | -2.349187000 |
| H | 4.380537000  | 2.822238000  | -2.335606000 |
| H | 3.028018000  | 2.023494000  | -3.157684000 |
| C | 2.768242000  | -4.199741000 | 0.765425000  |
| H | 3.805190000  | -4.504411000 | 0.946626000  |
| H | 2.136217000  | -4.824595000 | 1.405636000  |
| H | 2.526345000  | -4.428760000 | -0.277432000 |
| C | 2.943461000  | -2.418823000 | 2.541606000  |
| H | 2.404177000  | -3.068397000 | 3.241681000  |
| H | 4.016467000  | -2.588560000 | 2.684740000  |
| H | 2.731557000  | -1.376858000 | 2.799646000  |
| C | -0.965052000 | -1.288041000 | 2.209144000  |
| H | -1.360108000 | -2.275950000 | 1.937863000  |
| H | -0.051527000 | -1.491047000 | 2.777085000  |
| C | -2.019730000 | -0.529385000 | 3.025784000  |
| H | -1.051436000 | -1.118379000 | 0.774154000  |
| C | -2.530393000 | -1.352861000 | 4.210861000  |
| H | -3.278889000 | -0.795517000 | 4.783017000  |
| H | -2.994164000 | -2.284367000 | 3.869108000  |
| H | -1.713712000 | -1.614576000 | 4.892027000  |
| H | -1.608267000 | 0.418430000  | 3.398295000  |
| H | -2.862222000 | -0.264621000 | 2.374860000  |
| C | -2.777990000 | -1.451174000 | -1.630680000 |
| C | -3.746662000 | -0.550072000 | -1.159690000 |
| C | -3.172335000 | -2.766189000 | -1.897685000 |
| C | -5.065874000 | -0.952506000 | -0.972924000 |
| H | -3.458009000 | 0.472769000  | -0.929276000 |
| C | -4.495690000 | -3.170289000 | -1.707935000 |
| H | -2.451253000 | -3.490618000 | -2.262021000 |
| C | -5.447735000 | -2.266870000 | -1.245986000 |
| H | -5.799316000 | -0.235888000 | -0.612197000 |
| H | -4.777693000 | -4.197343000 | -1.924877000 |
| H | -6.477331000 | -2.581641000 | -1.099189000 |

**TS(3C-3D)****E = -1601.36197425**

|    |              |              |              |
|----|--------------|--------------|--------------|
| Mo | -0.142470000 | 0.645851000  | 0.081140000  |
| C  | 0.724953000  | -0.252593000 | 2.113701000  |
| H  | 0.015382000  | 0.393316000  | 2.644653000  |
| H  | 0.336977000  | -1.272447000 | 2.212845000  |
| C  | 2.102832000  | -0.124288000 | 2.816327000  |
| N  | -1.669236000 | -0.204764000 | 0.209849000  |
| O  | 1.249046000  | 2.045602000  | 0.352820000  |
| Si | 2.329307000  | 3.101816000  | -0.260784000 |
| C  | 1.007438000  | -0.589050000 | -0.862118000 |
| H  | 1.894099000  | -0.005389000 | -1.148318000 |
| C  | 1.036880000  | -2.013523000 | -1.402563000 |
| O  | 3.606483000  | 3.464646000  | 0.747736000  |
| H  | 3.422337000  | 4.219909000  | 1.314901000  |
| O  | 1.646568000  | 4.589948000  | -0.599031000 |
| H  | 0.745704000  | 4.520592000  | -0.931041000 |
| O  | 3.002092000  | 2.356744000  | -1.599616000 |
| H  | 3.800023000  | 2.802219000  | -1.902114000 |
| C  | -2.996257000 | -0.578314000 | 0.314268000  |
| C  | -3.612209000 | -0.661926000 | 1.596775000  |
| C  | -3.745974000 | -0.862371000 | -0.861544000 |
| C  | -4.952035000 | -1.034417000 | 1.671502000  |
| C  | -5.086929000 | -1.228050000 | -0.720090000 |
| C  | -5.690857000 | -1.318382000 | 0.526262000  |
| H  | -5.431059000 | -1.105846000 | 2.642803000  |
| H  | -5.670168000 | -1.444354000 | -1.611293000 |
| H  | -6.734902000 | -1.607727000 | 0.608505000  |
| C  | 2.072162000  | -1.085982000 | 4.020305000  |
| H  | 2.997354000  | -1.002381000 | 4.602282000  |
| H  | 1.234675000  | -0.858201000 | 4.690102000  |
| H  | 1.973359000  | -2.128685000 | 3.696731000  |
| C  | 3.272476000  | -0.509253000 | 1.903436000  |
| H  | 3.164845000  | -1.526168000 | 1.510170000  |
| H  | 3.355622000  | 0.181718000  | 1.059805000  |
| H  | 4.217494000  | -0.468210000 | 2.456745000  |
| C  | 2.313273000  | 1.302284000  | 3.341607000  |
| H  | 2.357179000  | 2.019421000  | 2.521648000  |
| H  | 1.502601000  | 1.593287000  | 4.021245000  |
| H  | 3.253923000  | 1.364797000  | 3.900931000  |
| C  | -0.074945000 | -2.871033000 | -0.794802000 |
| H  | -0.076184000 | -3.873715000 | -1.234318000 |
| H  | 0.028599000  | -2.969778000 | 0.289893000  |
| H  | -1.043818000 | -2.408940000 | -0.984844000 |
| C  | 0.804669000  | -1.918605000 | -2.930118000 |
| H  | -0.191408000 | -1.517704000 | -3.136666000 |
| H  | 1.537806000  | -1.268709000 | -3.414969000 |
| H  | 0.883497000  | -2.913985000 | -3.380180000 |
| C  | -3.159442000 | -0.760479000 | -2.258715000 |
| H  | -2.101121000 | -0.502284000 | -2.153799000 |
| C  | -2.834046000 | -0.305743000 | 2.848970000  |
| H  | -1.799374000 | -0.614825000 | 2.675717000  |
| C  | -2.839885000 | 1.216814000  | 3.066927000  |
| H  | -3.859098000 | 1.574652000  | 3.250514000  |
| H  | -2.225716000 | 1.490296000  | 3.932472000  |
| H  | -2.455752000 | 1.751282000  | 2.192086000  |

|   |              |              |              |
|---|--------------|--------------|--------------|
| C | -3.313129000 | -1.030055000 | 4.110283000  |
| H | -2.619060000 | -0.837259000 | 4.934812000  |
| H | -4.299835000 | -0.683808000 | 4.437337000  |
| H | -3.366202000 | -2.112859000 | 3.959147000  |
| C | -3.256247000 | -2.091859000 | -3.019083000 |
| H | -4.298925000 | -2.371744000 | -3.204844000 |
| H | -2.761953000 | -2.011463000 | -3.993501000 |
| H | -2.787131000 | -2.911228000 | -2.466898000 |
| C | -3.834202000 | 0.360761000  | -3.063690000 |
| H | -3.368629000 | 0.457030000  | -4.050667000 |
| H | -4.898957000 | 0.153401000  | -3.218394000 |
| H | -3.752617000 | 1.324049000  | -2.553011000 |
| C | -1.180163000 | 2.296077000  | -0.920873000 |
| H | -2.265721000 | 2.138891000  | -0.902413000 |
| H | -0.978167000 | 3.174366000  | -0.286828000 |
| C | -0.734596000 | 2.571490000  | -2.362378000 |
| H | 0.358402000  | 2.654421000  | -2.426051000 |
| H | -0.994208000 | 1.711245000  | -2.992723000 |
| C | -1.369575000 | 3.829064000  | -2.966279000 |
| H | -2.462942000 | 3.758127000  | -2.964468000 |
| H | -1.107982000 | 4.728982000  | -2.394812000 |
| H | -1.043596000 | 3.989994000  | -4.000169000 |
| H | 1.115718000  | -0.553594000 | 0.644189000  |
| C | 2.436426000  | -2.610886000 | -1.150444000 |
| C | 3.574479000  | -1.987988000 | -1.686806000 |
| C | 2.628643000  | -3.779322000 | -0.404014000 |
| C | 4.848789000  | -2.508342000 | -1.484039000 |
| H | 3.471877000  | -1.076117000 | -2.269408000 |
| C | 3.905901000  | -4.304521000 | -0.198273000 |
| H | 1.779393000  | -4.298548000 | 0.026658000  |
| C | 5.022323000  | -3.672204000 | -0.735597000 |
| H | 5.709461000  | -2.000418000 | -1.910847000 |
| H | 4.021648000  | -5.213568000 | 0.386120000  |
| H | 6.016619000  | -4.079179000 | -0.574482000 |

#### 4A

**E = -1611.45813148**

|    |              |              |              |
|----|--------------|--------------|--------------|
| Mo | -0.210036000 | 0.568043000  | 0.005981000  |
| N  | 1.309403000  | -0.257453000 | 0.126766000  |
| O  | -0.178343000 | 2.090809000  | -1.201328000 |
| Si | -0.965801000 | 3.531106000  | -1.345124000 |
| C  | -0.523904000 | 1.197043000  | 1.732509000  |
| H  | -1.435643000 | 1.806038000  | 1.544064000  |
| C  | 0.031994000  | 1.355505000  | 3.127927000  |
| O  | -1.682422000 | 3.766157000  | -2.824640000 |
| H  | -1.083561000 | 4.135639000  | -3.480839000 |
| O  | 0.108642000  | 4.792444000  | -1.159967000 |
| H  | 0.795311000  | 4.614105000  | -0.510215000 |
| O  | -2.188854000 | 3.509791000  | -0.213947000 |
| H  | -2.883962000 | 4.153962000  | -0.379510000 |
| C  | 2.539885000  | -0.880364000 | 0.118302000  |
| C  | 2.637690000  | -2.273326000 | 0.372316000  |
| C  | 3.704682000  | -0.099223000 | -0.129111000 |
| C  | 3.907055000  | -2.854643000 | 0.379709000  |
| C  | 4.943518000  | -0.737509000 | -0.111311000 |
| C  | 5.051079000  | -2.102579000 | 0.141894000  |

|   |              |              |              |
|---|--------------|--------------|--------------|
| H | 3.999353000  | -3.920142000 | 0.573980000  |
| H | 5.843973000  | -0.160051000 | -0.297450000 |
| H | 6.028107000  | -2.578137000 | 0.152156000  |
| C | 1.048027000  | 0.257585000  | 3.458914000  |
| H | 1.459600000  | 0.408260000  | 4.463571000  |
| H | 0.576753000  | -0.729817000 | 3.429142000  |
| H | 1.874614000  | 0.254768000  | 2.743863000  |
| C | -1.129359000 | 1.311314000  | 4.139446000  |
| H | -0.748914000 | 1.433532000  | 5.160166000  |
| H | -1.851458000 | 2.112768000  | 3.949017000  |
| H | -1.664851000 | 0.358923000  | 4.086336000  |
| C | 0.718282000  | 2.735199000  | 3.213432000  |
| H | 1.566284000  | 2.790079000  | 2.523009000  |
| H | 0.019773000  | 3.541788000  | 2.965816000  |
| H | 1.093075000  | 2.911739000  | 4.228965000  |
| C | 3.591547000  | 1.379052000  | -0.451531000 |
| H | 2.685563000  | 1.745740000  | 0.045880000  |
| C | 1.414741000  | -3.134723000 | 0.625456000  |
| H | 0.536315000  | -2.485777000 | 0.556120000  |
| C | 1.270006000  | -4.227147000 | -0.443202000 |
| H | 2.115850000  | -4.923695000 | -0.421655000 |
| H | 0.357519000  | -4.807769000 | -0.271868000 |
| H | 1.210366000  | -3.796726000 | -1.446671000 |
| C | 1.438380000  | -3.745263000 | 2.034174000  |
| H | 0.520099000  | -4.313331000 | 2.220130000  |
| H | 2.282628000  | -4.432512000 | 2.159823000  |
| H | 1.523966000  | -2.971600000 | 2.803149000  |
| C | 4.769640000  | 2.213348000  | 0.061060000  |
| H | 5.696867000  | 1.993685000  | -0.479649000 |
| H | 4.563736000  | 3.279293000  | -0.083962000 |
| H | 4.952497000  | 2.044278000  | 1.127009000  |
| C | 3.397633000  | 1.579702000  | -1.963546000 |
| H | 3.266841000  | 2.641391000  | -2.200860000 |
| H | 4.270543000  | 1.212737000  | -2.515397000 |
| H | 2.515916000  | 1.043160000  | -2.323691000 |
| N | -1.743525000 | -0.654957000 | -0.381298000 |
| C | -1.635063000 | -1.393726000 | -1.590232000 |
| C | -2.018447000 | -2.744745000 | -1.660328000 |
| C | -1.100886000 | -0.785893000 | -2.738806000 |
| C | -1.853267000 | -3.462580000 | -2.839290000 |
| H | -2.446721000 | -3.221519000 | -0.784407000 |
| C | -0.917462000 | -1.521670000 | -3.908736000 |
| H | -0.863364000 | 0.275199000  | -2.725335000 |
| C | -1.292547000 | -2.861595000 | -3.968060000 |
| H | -2.157725000 | -4.505404000 | -2.873922000 |
| H | -0.503008000 | -1.030895000 | -4.785273000 |
| H | -1.162979000 | -3.429074000 | -4.884948000 |
| C | -2.871394000 | -0.950317000 | 0.434908000  |
| C | -2.722676000 | -1.362620000 | 1.763816000  |
| C | -4.163973000 | -0.829224000 | -0.097202000 |
| C | -3.842446000 | -1.630035000 | 2.549245000  |
| H | -1.720961000 | -1.466983000 | 2.168696000  |
| C | -5.278288000 | -1.099293000 | 0.691551000  |
| H | -4.282032000 | -0.514005000 | -1.129872000 |
| C | -5.125055000 | -1.498896000 | 2.019558000  |
| H | -3.708529000 | -1.952239000 | 3.578670000  |



|   |              |              |             |
|---|--------------|--------------|-------------|
| H | -6.272507000 | -0.989655000 | 0.266491000 |
| H | -5.996296000 | -1.708067000 | 2.633599000 |

**4B**

**E = -1092.88418562**

|    |              |              |              |
|----|--------------|--------------|--------------|
| Mo | -0.703102000 | -0.177728000 | -0.241455000 |
| N  | 1.033010000  | -0.352490000 | 0.101632000  |
| O  | -1.944115000 | 1.238141000  | -0.742239000 |
| Si | -3.569339000 | 1.540964000  | -0.769132000 |
| C  | -1.412331000 | -1.598567000 | 0.521556000  |
| C  | -1.430290000 | -2.862297000 | 1.305368000  |
| O  | -4.167411000 | 0.740221000  | -2.096050000 |
| H  | -5.127716000 | 0.679427000  | -2.094143000 |
| O  | -3.790502000 | 3.196592000  | -0.818420000 |
| H  | -3.114867000 | 3.642446000  | -1.338921000 |
| O  | -4.439405000 | 1.028513000  | 0.551970000  |
| H  | -4.431182000 | 1.665580000  | 1.272949000  |
| C  | 2.292331000  | 0.175144000  | 0.034427000  |
| C  | 3.130684000  | -0.188077000 | -1.063426000 |
| C  | 2.775359000  | 1.021429000  | 1.075710000  |
| C  | 4.434858000  | 0.297352000  | -1.085163000 |
| C  | 4.092147000  | 1.469341000  | 0.998576000  |
| C  | 4.917535000  | 1.118788000  | -0.067543000 |
| H  | 5.091174000  | 0.031021000  | -1.908039000 |
| H  | 4.484187000  | 2.107283000  | 1.785132000  |
| H  | 5.938830000  | 1.487155000  | -0.106666000 |
| C  | -0.564110000 | -3.914997000 | 0.587930000  |
| H  | -0.584036000 | -4.858985000 | 1.145010000  |
| H  | -0.937412000 | -4.106962000 | -0.423016000 |
| H  | 0.473790000  | -3.577799000 | 0.513675000  |
| C  | -2.887947000 | -3.359159000 | 1.406089000  |
| H  | -2.924445000 | -4.288851000 | 1.986732000  |
| H  | -3.521629000 | -2.616230000 | 1.898691000  |
| H  | -3.303996000 | -3.554470000 | 0.413421000  |
| C  | -0.869499000 | -2.586245000 | 2.713169000  |
| H  | 0.162257000  | -2.227380000 | 2.654968000  |
| H  | -1.468773000 | -1.830828000 | 3.231177000  |
| H  | -0.884572000 | -3.505197000 | 3.310678000  |
| C  | 1.855447000  | 1.427048000  | 2.210130000  |
| H  | 1.125828000  | 0.613966000  | 2.330163000  |
| C  | 2.565822000  | -1.058699000 | -2.167831000 |
| H  | 1.896015000  | -1.782197000 | -1.680888000 |
| C  | 1.701219000  | -0.231827000 | -3.135370000 |
| H  | 2.302439000  | 0.524718000  | -3.652231000 |
| H  | 1.235767000  | -0.875199000 | -3.890081000 |
| H  | 0.899559000  | 0.302312000  | -2.608581000 |
| C  | 3.623477000  | -1.845090000 | -2.945535000 |
| H  | 3.137787000  | -2.546884000 | -3.631061000 |
| H  | 4.258038000  | -1.190155000 | -3.553195000 |
| H  | 4.271023000  | -2.419528000 | -2.275990000 |
| C  | 2.572642000  | 1.609041000  | 3.550977000  |
| H  | 3.235284000  | 2.481746000  | 3.548008000  |
| H  | 1.839999000  | 1.766846000  | 4.349220000  |
| H  | 3.171585000  | 0.730157000  | 3.808698000  |
| C  | 1.065961000  | 2.695400000  | 1.843645000  |
| H  | 0.354907000  | 2.952629000  | 2.636857000  |

|   |             |             |             |
|---|-------------|-------------|-------------|
| H | 1.741319000 | 3.546883000 | 1.702563000 |
| H | 0.500449000 | 2.567753000 | 0.914051000 |

**4C**

**E = -1730.53836586**

|    |              |              |              |
|----|--------------|--------------|--------------|
| Mo | 0.302117000  | -0.528375000 | -0.059795000 |
| N  | -1.400903000 | -0.084942000 | 0.070659000  |
| O  | 2.113972000  | -1.353971000 | -0.277810000 |
| Si | 3.535733000  | -2.107447000 | -0.038502000 |
| C  | 0.370092000  | -1.476659000 | 1.840548000  |
| H  | 0.057522000  | -2.474026000 | 1.470402000  |
| C  | -0.347143000 | -1.134920000 | 3.156304000  |
| O  | 4.303476000  | -1.712851000 | 1.396380000  |
| H  | 4.950959000  | -1.011608000 | 1.269467000  |
| O  | 4.637494000  | -1.688631000 | -1.226021000 |
| H  | 4.210451000  | -1.462315000 | -2.058149000 |
| O  | 3.226456000  | -3.744540000 | 0.021854000  |
| H  | 3.981856000  | -4.258346000 | 0.323962000  |
| C  | -2.739247000 | 0.254620000  | 0.045015000  |
| C  | -3.116360000 | 1.612375000  | 0.275563000  |
| C  | -3.746305000 | -0.722009000 | -0.219613000 |
| C  | -4.467573000 | 1.953334000  | 0.216805000  |
| C  | -5.078607000 | -0.313370000 | -0.278387000 |
| C  | -5.447202000 | 1.009331000  | -0.065277000 |
| H  | -4.757739000 | 2.985226000  | 0.396051000  |
| H  | -5.846747000 | -1.051993000 | -0.491719000 |
| H  | -6.492712000 | 1.301340000  | -0.112961000 |
| C  | -0.079022000 | 0.321719000  | 3.552982000  |
| H  | -0.555293000 | 0.554121000  | 4.512796000  |
| H  | 0.993021000  | 0.517791000  | 3.654552000  |
| H  | -0.473354000 | 1.013048000  | 2.802634000  |
| C  | 0.248929000  | -2.059475000 | 4.239035000  |
| H  | -0.223062000 | -1.868021000 | 5.210174000  |
| H  | 0.089916000  | -3.115213000 | 3.991182000  |
| H  | 1.326908000  | -1.899598000 | 4.350533000  |
| C  | -1.854180000 | -1.389441000 | 3.087145000  |
| H  | -2.342631000 | -0.741590000 | 2.357527000  |
| H  | -2.058884000 | -2.430680000 | 2.813184000  |
| H  | -2.317922000 | -1.206684000 | 4.063515000  |
| C  | -3.427516000 | -2.186543000 | -0.451985000 |
| H  | -2.355925000 | -2.315279000 | -0.279997000 |
| C  | -2.106385000 | 2.695767000  | 0.609555000  |
| H  | -1.111312000 | 2.243991000  | 0.582688000  |
| C  | -2.131393000 | 3.833696000  | -0.421550000 |
| H  | -3.109097000 | 4.327293000  | -0.453168000 |
| H  | -1.390174000 | 4.596449000  | -0.160337000 |
| H  | -1.903914000 | 3.471115000  | -1.427862000 |
| C  | -2.338951000 | 3.251654000  | 2.023065000  |
| H  | -1.547200000 | 3.961300000  | 2.285771000  |
| H  | -3.297060000 | 3.779167000  | 2.091222000  |
| H  | -2.344551000 | 2.456287000  | 2.773663000  |
| C  | -4.172672000 | -3.103997000 | 0.528994000  |
| H  | -5.254827000 | -3.079007000 | 0.360622000  |
| H  | -3.846794000 | -4.141852000 | 0.398163000  |
| H  | -3.990552000 | -2.816888000 | 1.567534000  |
| C  | -3.737928000 | -2.602633000 | -1.898155000 |

|   |              |              |              |
|---|--------------|--------------|--------------|
| H | -3.431354000 | -3.639158000 | -2.075016000 |
| H | -4.812322000 | -2.535024000 | -2.102939000 |
| H | -3.225018000 | -1.965979000 | -2.624989000 |
| C | -0.108727000 | -1.791087000 | -1.731344000 |
| H | -1.077628000 | -1.534278000 | -2.164263000 |
| H | 0.680539000  | -1.442963000 | -2.412337000 |
| C | 0.020705000  | -3.295980000 | -1.497627000 |
| H | 0.964642000  | -3.521227000 | -0.994008000 |
| H | -0.782749000 | -3.646023000 | -0.836196000 |
| C | -0.046662000 | -4.079044000 | -2.813767000 |
| H | -0.984359000 | -3.891237000 | -3.348121000 |
| H | 0.777042000  | -3.796857000 | -3.478676000 |
| H | 0.027863000  | -5.156323000 | -2.630625000 |
| H | 1.446560000  | -1.548339000 | 2.029782000  |
| N | 1.078832000  | 1.251475000  | -0.514322000 |
| C | 1.029796000  | 1.664382000  | -1.862591000 |
| C | 1.763579000  | 2.043314000  | 0.428163000  |
| C | 2.175808000  | 2.200293000  | -2.482204000 |
| C | -0.135366000 | 1.508047000  | -2.632336000 |
| C | 1.613176000  | 3.444157000  | 0.425020000  |
| C | 2.589508000  | 1.460569000  | 1.403368000  |
| C | 2.146023000  | 2.572850000  | -3.820467000 |
| H | 3.083111000  | 2.322506000  | -1.898722000 |
| C | -0.147051000 | 1.868067000  | -3.979534000 |
| H | -1.033395000 | 1.116478000  | -2.166205000 |
| C | 2.261749000  | 4.226701000  | 1.371710000  |
| H | 0.990337000  | 3.905728000  | -0.334541000 |
| C | 3.217384000  | 2.254868000  | 2.362797000  |
| H | 2.763877000  | 0.390404000  | 1.386164000  |
| C | 0.987732000  | 2.404250000  | -4.582660000 |
| H | 3.041166000  | 2.988688000  | -4.275872000 |
| H | -1.061159000 | 1.740356000  | -4.553435000 |
| C | 3.060500000  | 3.638033000  | 2.355256000  |
| H | 2.134945000  | 5.305965000  | 1.347737000  |
| H | 3.849603000  | 1.782563000  | 3.110357000  |
| H | 0.971940000  | 2.690655000  | -5.630061000 |
| H | 3.559462000  | 4.253054000  | 3.098408000  |

#### 4D

**E = -1212.07701855**

|    |              |              |              |
|----|--------------|--------------|--------------|
| Mo | -0.676113000 | 0.424108000  | -0.260217000 |
| N  | 1.015878000  | 0.057617000  | -0.249333000 |
| O  | -2.021927000 | -0.666614000 | -1.117804000 |
| Si | -3.489548000 | -1.342120000 | -0.772712000 |
| C  | -1.066396000 | 0.810546000  | 1.522649000  |
| H  | -2.167707000 | 0.955520000  | 1.458372000  |
| C  | -0.530557000 | 0.918272000  | 2.928764000  |
| O  | -3.437129000 | -2.748675000 | 0.109536000  |
| H  | -3.319347000 | -3.531698000 | -0.437187000 |
| O  | -4.250784000 | -1.730608000 | -2.202849000 |
| H  | -4.048230000 | -1.119413000 | -2.918038000 |
| O  | -4.301611000 | -0.220918000 | 0.151572000  |
| H  | -5.071138000 | -0.580944000 | 0.603411000  |
| C  | 2.270850000  | -0.517005000 | -0.291932000 |
| C  | 3.398543000  | 0.316462000  | -0.509437000 |
| C  | 2.417505000  | -1.917224000 | -0.104856000 |

|   |              |              |              |
|---|--------------|--------------|--------------|
| C | 4.659091000  | -0.279368000 | -0.557556000 |
| C | 3.703618000  | -2.454896000 | -0.155994000 |
| C | 4.816466000  | -1.650716000 | -0.384368000 |
| H | 5.534564000  | 0.340019000  | -0.729638000 |
| H | 3.840200000  | -3.523033000 | -0.014880000 |
| H | 5.807974000  | -2.093640000 | -0.422763000 |
| C | 0.981863000  | 0.678806000  | 2.980344000  |
| H | 1.347631000  | 0.786962000  | 4.007901000  |
| H | 1.236214000  | -0.326040000 | 2.630973000  |
| H | 1.514397000  | 1.394201000  | 2.347205000  |
| C | -1.248817000 | -0.124427000 | 3.809009000  |
| H | -0.894858000 | -0.059341000 | 4.844845000  |
| H | -2.332414000 | 0.036256000  | 3.811456000  |
| H | -1.059301000 | -1.139450000 | 3.445850000  |
| C | -0.845230000 | 2.332167000  | 3.458211000  |
| H | -0.345214000 | 3.096119000  | 2.854421000  |
| H | -1.921960000 | 2.533806000  | 3.439024000  |
| H | -0.501241000 | 2.436365000  | 4.494243000  |
| C | 1.205912000  | -2.806112000 | 0.107529000  |
| H | 0.416747000  | -2.179448000 | 0.542656000  |
| C | 3.221575000  | 1.806425000  | -0.734777000 |
| H | 2.268921000  | 2.083399000  | -0.269857000 |
| C | 4.321582000  | 2.655362000  | -0.089142000 |
| H | 5.292907000  | 2.513372000  | -0.575873000 |
| H | 4.073140000  | 3.718483000  | -0.175574000 |
| H | 4.439771000  | 2.420010000  | 0.973223000  |
| C | 3.105984000  | 2.109417000  | -2.237391000 |
| H | 2.925631000  | 3.176976000  | -2.406139000 |
| H | 4.028907000  | 1.834968000  | -2.760942000 |
| H | 2.283046000  | 1.549485000  | -2.691706000 |
| C | 0.690033000  | -3.337039000 | -1.239517000 |
| H | 1.446691000  | -3.967339000 | -1.720164000 |
| H | -0.213301000 | -3.940451000 | -1.096541000 |
| H | 0.445514000  | -2.520076000 | -1.924590000 |
| C | 1.453434000  | -3.957266000 | 1.087710000  |
| H | 0.511666000  | -4.472784000 | 1.302637000  |
| H | 2.143091000  | -4.705005000 | 0.680630000  |
| H | 1.867124000  | -3.597304000 | 2.034852000  |
| C | -0.761111000 | 2.390027000  | -1.085887000 |
| H | 0.090146000  | 2.995617000  | -0.756055000 |
| H | -0.622861000 | 2.220703000  | -2.169711000 |
| C | -2.074937000 | 3.133517000  | -0.830903000 |
| H | -2.137742000 | 3.386351000  | 0.234926000  |
| H | -2.935841000 | 2.481482000  | -1.035377000 |
| C | -2.214346000 | 4.408235000  | -1.668311000 |
| H | -3.155556000 | 4.927173000  | -1.454705000 |
| H | -1.393177000 | 5.104153000  | -1.462498000 |
| H | -2.193873000 | 4.181784000  | -2.740486000 |

**TS(4A-4B)**

**E = -1611.37833692**

|    |              |              |              |
|----|--------------|--------------|--------------|
| Mo | 0.232014000  | -0.401845000 | -0.133072000 |
| N  | -1.257457000 | 0.305660000  | -0.753935000 |
| O  | 0.468769000  | -2.174605000 | -0.910711000 |
| Si | 0.711208000  | -3.701210000 | -0.346074000 |
| C  | 0.125231000  | -0.571805000 | 1.632611000  |

|   |              |              |              |
|---|--------------|--------------|--------------|
| H | 1.448257000  | 0.082875000  | 1.173335000  |
| C | -0.262977000 | -0.637934000 | 3.074197000  |
| O | 1.970410000  | -3.892838000 | 0.732719000  |
| H | 2.808375000  | -4.027114000 | 0.278600000  |
| O | 1.115239000  | -4.670640000 | -1.645708000 |
| H | 0.681142000  | -4.390705000 | -2.458053000 |
| O | -0.671305000 | -4.188019000 | 0.442359000  |
| H | -0.540875000 | -4.998742000 | 0.944403000  |
| C | -2.571286000 | 0.733507000  | -0.726293000 |
| C | -2.853791000 | 2.085571000  | -1.061944000 |
| C | -3.620873000 | -0.176956000 | -0.424875000 |
| C | -4.183537000 | 2.506764000  | -1.052676000 |
| C | -4.930421000 | 0.305103000  | -0.428895000 |
| C | -5.217195000 | 1.632562000  | -0.731360000 |
| H | -4.416643000 | 3.537679000  | -1.301455000 |
| H | -5.744921000 | -0.372772000 | -0.192308000 |
| H | -6.245692000 | 1.983253000  | -0.724170000 |
| C | -0.426131000 | -2.120081000 | 3.465560000  |
| H | -0.717498000 | -2.195892000 | 4.520112000  |
| H | -1.192993000 | -2.603309000 | 2.854966000  |
| H | 0.510405000  | -2.666638000 | 3.322613000  |
| C | -1.590332000 | 0.110371000  | 3.295174000  |
| H | -1.902243000 | 0.025919000  | 4.342993000  |
| H | -1.489442000 | 1.173086000  | 3.055153000  |
| H | -2.381820000 | -0.303504000 | 2.664765000  |
| C | 0.847064000  | -0.000853000 | 3.933133000  |
| H | 1.798060000  | -0.527694000 | 3.800415000  |
| H | 0.996055000  | 1.052780000  | 3.676534000  |
| H | 0.575598000  | -0.057578000 | 4.993525000  |
| C | -3.323001000 | -1.644720000 | -0.179910000 |
| H | -2.359467000 | -1.708221000 | 0.339629000  |
| C | -1.732383000 | 3.017404000  | -1.488173000 |
| H | -0.843055000 | 2.739872000  | -0.911772000 |
| C | -1.397408000 | 2.797514000  | -2.973100000 |
| H | -2.256448000 | 3.049996000  | -3.605054000 |
| H | -0.555521000 | 3.429588000  | -3.279746000 |
| H | -1.132904000 | 1.753429000  | -3.164912000 |
| C | -2.010765000 | 4.496900000  | -1.211652000 |
| H | -1.109431000 | 5.088139000  | -1.403459000 |
| H | -2.800602000 | 4.895410000  | -1.858508000 |
| H | -2.309679000 | 4.664963000  | -0.171986000 |
| C | -4.353570000 | -2.355744000 | 0.700957000  |
| H | -5.320893000 | -2.466753000 | 0.197546000  |
| H | -3.997238000 | -3.362725000 | 0.939579000  |
| H | -4.523685000 | -1.822429000 | 1.642258000  |
| C | -3.163759000 | -2.380127000 | -1.521010000 |
| H | -2.887239000 | -3.425267000 | -1.349438000 |
| H | -4.102645000 | -2.355317000 | -2.086476000 |
| H | -2.384384000 | -1.915953000 | -2.131804000 |
| N | 1.932523000  | 0.887356000  | 0.187723000  |
| C | 2.034494000  | 2.207434000  | 0.686711000  |
| C | 3.243776000  | 2.916028000  | 0.617002000  |
| C | 0.928314000  | 2.812548000  | 1.302770000  |
| C | 3.335754000  | 4.197379000  | 1.153467000  |
| H | 4.109751000  | 2.461090000  | 0.147326000  |
| C | 1.039231000  | 4.088861000  | 1.848318000  |

|   |              |              |              |
|---|--------------|--------------|--------------|
| H | -0.018044000 | 2.280248000  | 1.335304000  |
| C | 2.240185000  | 4.792862000  | 1.776406000  |
| H | 4.280509000  | 4.730472000  | 1.086614000  |
| H | 0.170104000  | 4.539286000  | 2.320016000  |
| H | 2.319119000  | 5.792220000  | 2.193505000  |
| C | 2.940785000  | 0.382615000  | -0.690373000 |
| C | 3.842375000  | -0.589425000 | -0.241906000 |
| C | 2.994335000  | 0.820215000  | -2.022309000 |
| C | 4.782491000  | -1.124973000 | -1.121429000 |
| H | 3.799768000  | -0.912637000 | 0.794294000  |
| C | 3.939010000  | 0.284643000  | -2.891946000 |
| H | 2.291742000  | 1.577728000  | -2.358835000 |
| C | 4.832057000  | -0.691314000 | -2.445048000 |
| H | 5.483500000  | -1.876142000 | -0.768029000 |
| H | 3.976683000  | 0.626852000  | -3.922234000 |
| H | 5.566370000  | -1.109436000 | -3.127424000 |

**TS(4A-4C)**

**E = -1730.48920145**

|    |              |              |              |
|----|--------------|--------------|--------------|
| Mo | 0.315817000  | -0.520538000 | -0.151420000 |
| N  | -1.378068000 | -0.244387000 | 0.207825000  |
| O  | 1.984347000  | -0.678226000 | -1.243497000 |
| Si | 3.504636000  | -1.266348000 | -1.310522000 |
| C  | 0.860197000  | -1.674798000 | 1.299682000  |
| H  | 0.390330000  | -2.306501000 | 0.029180000  |
| C  | 0.346241000  | -2.414203000 | 2.520885000  |
| O  | 4.383567000  | -1.070875000 | 0.090643000  |
| H  | 4.566221000  | -0.146017000 | 0.302405000  |
| O  | 4.364158000  | -0.545606000 | -2.548840000 |
| H  | 3.788646000  | -0.282869000 | -3.274168000 |
| O  | 3.383056000  | -2.923308000 | -1.517931000 |
| H  | 4.235796000  | -3.367747000 | -1.479942000 |
| C  | -2.679930000 | 0.164852000  | 0.421351000  |
| C  | -2.963328000 | 0.922498000  | 1.598484000  |
| C  | -3.722420000 | -0.138189000 | -0.498992000 |
| C  | -4.275280000 | 1.339140000  | 1.821033000  |
| C  | -5.012413000 | 0.312312000  | -0.219299000 |
| C  | -5.297806000 | 1.041612000  | 0.928206000  |
| H  | -4.498237000 | 1.921256000  | 2.710779000  |
| H  | -5.811751000 | 0.089369000  | -0.920745000 |
| H  | -6.311099000 | 1.381843000  | 1.122898000  |
| C  | 0.834572000  | -1.626903000 | 3.754308000  |
| H  | 0.566289000  | -2.167702000 | 4.668949000  |
| H  | 1.922249000  | -1.500203000 | 3.743665000  |
| H  | 0.372666000  | -0.636724000 | 3.797784000  |
| C  | 0.986150000  | -3.817942000 | 2.549232000  |
| H  | 0.669178000  | -4.358802000 | 3.448155000  |
| H  | 0.687571000  | -4.411253000 | 1.678734000  |
| H  | 2.079440000  | -3.757409000 | 2.556515000  |
| C  | -1.177595000 | -2.546140000 | 2.557573000  |
| H  | -1.666901000 | -1.571535000 | 2.515394000  |
| H  | -1.545013000 | -3.140195000 | 1.715554000  |
| H  | -1.486517000 | -3.047672000 | 3.481468000  |
| C  | -3.483097000 | -0.905637000 | -1.785625000 |
| H  | -2.442526000 | -1.240226000 | -1.780297000 |
| C  | -1.884433000 | 1.336864000  | 2.584141000  |

|   |              |              |              |
|---|--------------|--------------|--------------|
| H | -0.975439000 | 0.785058000  | 2.326006000  |
| C | -1.570161000 | 2.833125000  | 2.436682000  |
| H | -2.444997000 | 3.444509000  | 2.686483000  |
| H | -0.755849000 | 3.121365000  | 3.110852000  |
| H | -1.268554000 | 3.073315000  | 1.414630000  |
| C | -2.251615000 | 1.003893000  | 4.036939000  |
| H | -1.413189000 | 1.241765000  | 4.700834000  |
| H | -3.110409000 | 1.588400000  | 4.384190000  |
| H | -2.496561000 | -0.054754000 | 4.165874000  |
| C | -4.381098000 | -2.146918000 | -1.887047000 |
| H | -5.438148000 | -1.870110000 | -1.961511000 |
| H | -4.133169000 | -2.728111000 | -2.781398000 |
| H | -4.272078000 | -2.798975000 | -1.015092000 |
| C | -3.675301000 | -0.001133000 | -3.012468000 |
| H | -3.423280000 | -0.541301000 | -3.932171000 |
| H | -4.715435000 | 0.332220000  | -3.098198000 |
| H | -3.045883000 | 0.890079000  | -2.949223000 |
| C | -0.068976000 | -2.471218000 | -1.431394000 |
| H | -0.451420000 | -1.854991000 | -2.255105000 |
| H | 0.905599000  | -2.850133000 | -1.747907000 |
| C | -1.043935000 | -3.604619000 | -1.127462000 |
| H | -0.627274000 | -4.249207000 | -0.341244000 |
| H | -1.981054000 | -3.204810000 | -0.725528000 |
| C | -1.330760000 | -4.458882000 | -2.363289000 |
| H | -1.777388000 | -3.859255000 | -3.164147000 |
| H | -0.408915000 | -4.900346000 | -2.756726000 |
| H | -2.022780000 | -5.275390000 | -2.130607000 |
| H | 1.954964000  | -1.769437000 | 1.208318000  |
| N | 0.831240000  | 1.495250000  | -0.130064000 |
| C | 2.089678000  | 1.809068000  | 0.420276000  |
| C | 3.123207000  | 2.362006000  | -0.360590000 |
| C | 2.363904000  | 1.515962000  | 1.766641000  |
| C | 4.382512000  | 2.591157000  | 0.185528000  |
| H | 2.930521000  | 2.592730000  | -1.403136000 |
| C | 3.628559000  | 1.737063000  | 2.306609000  |
| H | 1.568071000  | 1.110495000  | 2.383262000  |
| C | 4.649741000  | 2.272426000  | 1.520401000  |
| H | 5.167098000  | 3.006718000  | -0.441383000 |
| H | 3.813875000  | 1.498720000  | 3.350759000  |
| H | 5.635117000  | 2.449223000  | 1.941620000  |
| C | 0.266630000  | 2.419925000  | -1.016351000 |
| C | 0.317971000  | 3.806386000  | -0.758546000 |
| C | -0.393173000 | 2.000546000  | -2.186137000 |
| C | -0.276185000 | 4.717071000  | -1.623591000 |
| H | 0.828374000  | 4.156691000  | 0.133469000  |
| C | -0.995503000 | 2.919687000  | -3.043616000 |
| H | -0.400557000 | 0.944997000  | -2.451155000 |
| C | -0.943930000 | 4.284483000  | -2.770913000 |
| H | -0.223431000 | 5.778276000  | -1.393380000 |
| H | -1.485671000 | 2.563389000  | -3.946051000 |
| H | -1.405438000 | 4.999871000  | -3.444938000 |

**TS(4A-4D)**

**E = -1730.48326492**

|    |             |              |              |
|----|-------------|--------------|--------------|
| Mo | 0.317024000 | -0.593786000 | 0.223233000  |
| N  | 0.585908000 | 1.043112000  | -0.279425000 |

|    |              |              |              |
|----|--------------|--------------|--------------|
| O  | 2.126372000  | -1.131026000 | 0.847276000  |
| Si | 3.387485000  | -1.918310000 | 0.164823000  |
| C  | 0.168077000  | -1.522830000 | -1.378973000 |
| H  | 0.033480000  | -2.555249000 | -0.980562000 |
| C  | 0.279391000  | -1.459358000 | -2.882135000 |
| O  | 3.124311000  | -3.515273000 | -0.254841000 |
| H  | 3.322811000  | -4.115385000 | 0.471262000  |
| O  | 4.641408000  | -1.975380000 | 1.271659000  |
| H  | 4.621781000  | -1.226926000 | 1.876308000  |
| O  | 3.799072000  | -1.135695000 | -1.249798000 |
| H  | 4.474046000  | -1.607084000 | -1.748467000 |
| C  | 0.829780000  | 2.401824000  | -0.416835000 |
| C  | -0.143337000 | 3.241776000  | -1.023193000 |
| C  | 2.064417000  | 2.941067000  | 0.039061000  |
| C  | 0.145417000  | 4.601259000  | -1.154482000 |
| C  | 2.288461000  | 4.309045000  | -0.112032000 |
| C  | 1.344298000  | 5.140120000  | -0.704577000 |
| H  | -0.590940000 | 5.252237000  | -1.618310000 |
| H  | 3.225874000  | 4.730839000  | 0.240203000  |
| H  | 1.542733000  | 6.202588000  | -0.815959000 |
| C  | 0.950270000  | -0.155992000 | -3.328891000 |
| H  | 1.008992000  | -0.122110000 | -4.423047000 |
| H  | 0.385611000  | 0.713859000  | -2.987219000 |
| H  | 1.960987000  | -0.084332000 | -2.918613000 |
| C  | -1.133485000 | -1.564452000 | -3.488985000 |
| H  | -1.064095000 | -1.575041000 | -4.583269000 |
| H  | -1.640690000 | -2.480815000 | -3.171271000 |
| H  | -1.755945000 | -0.717302000 | -3.190442000 |
| C  | 1.126746000  | -2.656043000 | -3.357965000 |
| H  | 2.126175000  | -2.623219000 | -2.917353000 |
| H  | 0.662498000  | -3.609365000 | -3.082034000 |
| H  | 1.226624000  | -2.632648000 | -4.449422000 |
| C  | 3.118003000  | 2.075536000  | 0.705103000  |
| H  | 2.823145000  | 1.033013000  | 0.569335000  |
| C  | -1.479287000 | 2.723124000  | -1.523375000 |
| H  | -1.499304000 | 1.643049000  | -1.344795000 |
| C  | -2.642554000 | 3.360085000  | -0.747408000 |
| H  | -2.657106000 | 4.447543000  | -0.880176000 |
| H  | -3.604578000 | 2.979233000  | -1.109628000 |
| H  | -2.573269000 | 3.152369000  | 0.323623000  |
| C  | -1.652694000 | 2.957673000  | -3.031740000 |
| H  | -2.586723000 | 2.505079000  | -3.382607000 |
| H  | -1.696845000 | 4.026742000  | -3.267713000 |
| H  | -0.829417000 | 2.525366000  | -3.607124000 |
| C  | 4.501879000  | 2.244985000  | 0.065015000  |
| H  | 4.897298000  | 3.258404000  | 0.196550000  |
| H  | 5.216911000  | 1.554007000  | 0.524602000  |
| H  | 4.469552000  | 2.025644000  | -1.005468000 |
| C  | 3.171452000  | 2.353623000  | 2.215586000  |
| H  | 3.906204000  | 1.703167000  | 2.704092000  |
| H  | 3.459572000  | 3.391227000  | 2.419835000  |
| H  | 2.200803000  | 2.178110000  | 2.690702000  |
| C  | -0.166776000 | -1.965776000 | 2.244004000  |
| H  | 0.648206000  | -1.440824000 | 2.755951000  |
| H  | -1.189097000 | -1.338171000 | 1.407128000  |
| C  | 0.206404000  | -3.431642000 | 2.012275000  |



|   |              |              |              |
|---|--------------|--------------|--------------|
| H | 1.050869000  | -3.497422000 | 1.317234000  |
| H | -0.625787000 | -3.960902000 | 1.525833000  |
| C | 0.565797000  | -4.173111000 | 3.302681000  |
| H | 0.814688000  | -5.223354000 | 3.109999000  |
| H | 1.428458000  | -3.707299000 | 3.792281000  |
| H | -0.266887000 | -4.152545000 | 4.014929000  |
| H | -1.011952000 | -1.913159000 | 2.952677000  |
| N | -1.883032000 | -0.536937000 | 0.733799000  |
| C | -2.385016000 | 0.372386000  | 1.712529000  |
| C | -3.709498000 | 0.295437000  | 2.177833000  |
| C | -1.524233000 | 1.302144000  | 2.313241000  |
| C | -4.150457000 | 1.133681000  | 3.196439000  |
| H | -4.392799000 | -0.423835000 | 1.739336000  |
| C | -1.969404000 | 2.124792000  | 3.347221000  |
| H | -0.505710000 | 1.407037000  | 1.952671000  |
| C | -3.286131000 | 2.051974000  | 3.792969000  |
| H | -5.181014000 | 1.057917000  | 3.533392000  |
| H | -1.279654000 | 2.837579000  | 3.790833000  |
| H | -3.635827000 | 2.701666000  | 4.589685000  |
| C | -2.845507000 | -1.163480000 | -0.118952000 |
| C | -2.971455000 | -2.557121000 | -0.143425000 |
| C | -3.690352000 | -0.395942000 | -0.930797000 |
| C | -3.897995000 | -3.170287000 | -0.985164000 |
| H | -2.345995000 | -3.163656000 | 0.504549000  |
| C | -4.623974000 | -1.011739000 | -1.759618000 |
| H | -3.616127000 | 0.685530000  | -0.896132000 |
| C | -4.728642000 | -2.402239000 | -1.798660000 |
| H | -3.978361000 | -4.254019000 | -0.990785000 |
| H | -5.271052000 | -0.399314000 | -2.382007000 |
| H | -5.454961000 | -2.880257000 | -2.449403000 |

**TS(4B-4D)**

**E = -1212.01324140**

|    |              |              |              |
|----|--------------|--------------|--------------|
| Mo | -0.659629000 | 0.588239000  | -0.357037000 |
| N  | 0.942934000  | -0.022088000 | -0.803890000 |
| O  | -2.090913000 | -0.518966000 | -1.089738000 |
| Si | -3.394846000 | -1.314479000 | -0.475154000 |
| C  | -0.730006000 | 0.674274000  | 1.408276000  |
| C  | -0.516142000 | 0.675690000  | 2.881754000  |
| O  | -2.850121000 | -2.356635000 | 0.702380000  |
| H  | -3.569570000 | -2.757711000 | 1.200185000  |
| O  | -4.181101000 | -2.081957000 | -1.734341000 |
| H  | -3.569713000 | -2.401594000 | -2.405741000 |
| O  | -4.559253000 | -0.349326000 | 0.226431000  |
| H  | -5.209663000 | -0.042448000 | -0.413068000 |
| C  | 2.158396000  | -0.572153000 | -0.438351000 |
| C  | 2.268003000  | -1.980938000 | -0.279723000 |
| C  | 3.294662000  | 0.266731000  | -0.279786000 |
| C  | 3.514759000  | -2.513055000 | 0.050296000  |
| C  | 4.516699000  | -0.324528000 | 0.042914000  |
| C  | 4.633160000  | -1.700538000 | 0.211801000  |
| H  | 3.615820000  | -3.585680000 | 0.184947000  |
| H  | 5.394639000  | 0.301446000  | 0.170556000  |
| H  | 5.593598000  | -2.139183000 | 0.468429000  |
| C  | -0.425267000 | -0.802395000 | 3.314156000  |
| H  | -0.318191000 | -0.860337000 | 4.403605000  |

|   |              |              |              |
|---|--------------|--------------|--------------|
| H | -1.322663000 | -1.351779000 | 3.017802000  |
| H | 0.439634000  | -1.288605000 | 2.854040000  |
| C | -1.709748000 | 1.351672000  | 3.583787000  |
| H | -1.574817000 | 1.321840000  | 4.671450000  |
| H | -1.801389000 | 2.401745000  | 3.285336000  |
| H | -2.646375000 | 0.845483000  | 3.334197000  |
| C | 0.792498000  | 1.405307000  | 3.235953000  |
| H | 1.646007000  | 0.933463000  | 2.741352000  |
| H | 0.755338000  | 2.456875000  | 2.929509000  |
| H | 0.959877000  | 1.380753000  | 4.319131000  |
| C | 3.173039000  | 1.763392000  | -0.510829000 |
| H | 2.206307000  | 2.070404000  | -0.092223000 |
| C | 1.057689000  | -2.871477000 | -0.506784000 |
| H | 0.183765000  | -2.350170000 | -0.097854000 |
| C | 0.810869000  | -3.062127000 | -2.012587000 |
| H | 1.656702000  | -3.580156000 | -2.479165000 |
| H | -0.089551000 | -3.663907000 | -2.181480000 |
| H | 0.679491000  | -2.098869000 | -2.512977000 |
| C | 1.139088000  | -4.227388000 | 0.198400000  |
| H | 0.181571000  | -4.749526000 | 0.104424000  |
| H | 1.905613000  | -4.875647000 | -0.241997000 |
| H | 1.359572000  | -4.118191000 | 1.265260000  |
| C | 4.253564000  | 2.595046000  | 0.184645000  |
| H | 5.242834000  | 2.434025000  | -0.258287000 |
| H | 4.028379000  | 3.662094000  | 0.082726000  |
| H | 4.320173000  | 2.363538000  | 1.252572000  |
| C | 3.142236000  | 2.072460000  | -2.016862000 |
| H | 2.999094000  | 3.145163000  | -2.194955000 |
| H | 4.086716000  | 1.777317000  | -2.487555000 |
| H | 2.335029000  | 1.525683000  | -2.513383000 |
| C | -0.593130000 | 2.858323000  | -0.636176000 |
| H | -0.304053000 | 3.638584000  | 0.080270000  |
| H | 0.194168000  | 2.866897000  | -1.396779000 |
| C | -1.977956000 | 3.186604000  | -1.210445000 |
| H | -0.577769000 | 2.060711000  | 0.577070000  |
| C | -2.055630000 | 4.619672000  | -1.743206000 |
| H | -3.049522000 | 4.835341000  | -2.147926000 |
| H | -1.852012000 | 5.345360000  | -0.948249000 |
| H | -1.324826000 | 4.784353000  | -2.542035000 |
| H | -2.230913000 | 2.489220000  | -2.020298000 |
| H | -2.741146000 | 3.042459000  | -0.435212000 |

**TS(4C-4D)**

**E = -1730.48225876**

|    |              |              |              |
|----|--------------|--------------|--------------|
| Mo | -0.032706000 | -0.669583000 | 0.238674000  |
| N  | -1.607273000 | -0.110160000 | -0.185298000 |
| O  | 1.238438000  | -1.021116000 | -1.129016000 |
| Si | 2.389732000  | -1.857033000 | -1.991709000 |
| C  | 0.158383000  | -0.676799000 | 2.207311000  |
| H  | 1.066165000  | -1.275553000 | 2.407894000  |
| C  | -0.654700000 | -0.458769000 | 3.480155000  |
| O  | 3.720369000  | -2.279580000 | -1.112725000 |
| H  | 4.256606000  | -1.530837000 | -0.811533000 |
| O  | 2.887447000  | -0.922923000 | -3.276573000 |
| H  | 2.152758000  | -0.523362000 | -3.753182000 |
| O  | 1.639928000  | -3.260129000 | -2.479628000 |

|   |              |              |              |
|---|--------------|--------------|--------------|
| H | 2.253747000  | -3.907026000 | -2.841864000 |
| C | -2.703552000 | 0.302435000  | -0.925263000 |
| C | -2.521357000 | 1.129836000  | -2.068023000 |
| C | -3.998159000 | -0.114898000 | -0.516918000 |
| C | -3.660246000 | 1.544542000  | -2.758379000 |
| C | -5.094991000 | 0.326327000  | -1.257283000 |
| C | -4.935366000 | 1.154107000  | -2.362329000 |
| H | -3.546626000 | 2.180734000  | -3.630806000 |
| H | -6.092494000 | 0.010854000  | -0.964190000 |
| H | -5.804236000 | 1.489339000  | -2.921950000 |
| C | -1.711596000 | 0.634700000  | 3.293439000  |
| H | -2.304073000 | 0.748661000  | 4.207912000  |
| H | -1.246502000 | 1.599861000  | 3.068684000  |
| H | -2.390962000 | 0.392082000  | 2.472931000  |
| C | 0.303782000  | -0.037774000 | 4.612103000  |
| H | -0.250155000 | 0.115418000  | 5.545486000  |
| H | 1.063431000  | -0.806063000 | 4.796944000  |
| H | 0.816131000  | 0.899069000  | 4.369037000  |
| C | -1.329594000 | -1.787520000 | 3.861591000  |
| H | -2.023495000 | -2.114935000 | 3.082031000  |
| H | -0.590479000 | -2.582095000 | 4.011097000  |
| H | -1.891973000 | -1.672893000 | 4.795654000  |
| C | -4.205836000 | -1.065083000 | 0.647622000  |
| H | -3.240957000 | -1.176366000 | 1.151911000  |
| C | -1.144666000 | 1.514263000  | -2.579841000 |
| H | -0.427494000 | 1.383152000  | -1.762224000 |
| C | -0.730305000 | 0.570722000  | -3.720948000 |
| H | -1.429870000 | 0.642013000  | -4.561059000 |
| H | 0.262632000  | 0.848299000  | -4.094943000 |
| H | -0.703217000 | -0.472200000 | -3.391311000 |
| C | -1.047060000 | 2.979267000  | -3.019584000 |
| H | -0.011681000 | 3.217494000  | -3.283325000 |
| H | -1.661740000 | 3.188764000  | -3.901817000 |
| H | -1.349182000 | 3.656663000  | -2.216862000 |
| C | -5.214094000 | -0.525940000 | 1.670307000  |
| H | -6.221427000 | -0.449430000 | 1.246899000  |
| H | -5.274097000 | -1.198357000 | 2.532628000  |
| H | -4.927787000 | 0.465984000  | 2.032552000  |
| C | -4.623931000 | -2.455356000 | 0.142944000  |
| H | -4.721183000 | -3.154072000 | 0.981190000  |
| H | -5.590087000 | -2.415136000 | -0.372400000 |
| H | -3.888018000 | -2.862495000 | -0.556771000 |
| C | -0.524968000 | -2.759207000 | 0.191487000  |
| H | -1.489494000 | -2.911443000 | 0.688128000  |
| H | -0.662938000 | -2.981914000 | -0.876251000 |
| C | 0.533069000  | -3.689087000 | 0.787065000  |
| H | 1.535767000  | -3.417456000 | 0.433848000  |
| H | 0.547730000  | -3.568122000 | 1.878335000  |
| C | 0.279894000  | -5.159326000 | 0.444738000  |
| H | -0.708762000 | -5.482368000 | 0.790673000  |
| H | 0.324697000  | -5.312887000 | -0.638032000 |
| H | 1.028080000  | -5.810822000 | 0.910080000  |
| H | 0.711918000  | 0.399650000  | 1.761431000  |
| N | 1.494368000  | 1.306220000  | 0.756925000  |
| C | 2.856064000  | 1.000110000  | 0.584504000  |
| C | 3.563302000  | 0.297461000  | 1.576055000  |

|   |              |              |              |
|---|--------------|--------------|--------------|
| C | 3.538629000  | 1.326440000  | -0.603403000 |
| C | 4.887128000  | -0.092759000 | 1.376949000  |
| H | 3.068140000  | 0.074173000  | 2.516498000  |
| C | 4.865218000  | 0.952440000  | -0.794151000 |
| H | 3.006658000  | 1.872619000  | -1.375930000 |
| C | 5.548241000  | 0.229507000  | 0.190696000  |
| H | 5.408225000  | -0.639569000 | 2.158496000  |
| H | 5.364298000  | 1.208191000  | -1.724827000 |
| H | 6.582932000  | -0.064251000 | 0.039032000  |
| C | 1.109244000  | 2.646374000  | 0.786952000  |
| C | -0.253167000 | 3.004167000  | 0.685246000  |
| C | 2.032468000  | 3.696761000  | 0.997283000  |
| C | -0.664966000 | 4.328496000  | 0.802324000  |
| H | -0.993578000 | 2.229730000  | 0.511350000  |
| C | 1.610272000  | 5.017941000  | 1.094358000  |
| H | 3.088177000  | 3.464758000  | 1.094236000  |
| C | 0.259408000  | 5.353129000  | 1.002179000  |
| H | -1.725204000 | 4.558807000  | 0.725063000  |
| H | 2.353002000  | 5.796268000  | 1.254303000  |
| H | -0.064390000 | 6.386561000  | 1.081590000  |

### 5A

**E = -1381.70247139**

|    |              |              |              |
|----|--------------|--------------|--------------|
| Mo | -0.677467000 | -0.347998000 | -0.124748000 |
| N  | 0.942297000  | 0.247770000  | -0.106326000 |
| O  | -1.950097000 | 0.706151000  | -1.125268000 |
| Si | -3.374023000 | 1.466973000  | -0.775063000 |
| C  | -1.160341000 | -0.292503000 | 1.674010000  |
| H  | -2.228058000 | -0.598865000 | 1.613461000  |
| C  | -0.756562000 | 0.179920000  | 3.051275000  |
| O  | -4.384098000 | 0.596662000  | 0.225397000  |
| H  | -4.982064000 | 0.020669000  | -0.262361000 |
| O  | -4.230611000 | 1.688033000  | -2.186741000 |
| H  | -3.669937000 | 1.879474000  | -2.945255000 |
| O  | -2.983512000 | 2.877689000  | 0.010480000  |
| H  | -3.746125000 | 3.312657000  | 0.404980000  |
| C  | 2.218728000  | 0.762509000  | -0.185683000 |
| C  | 3.335690000  | -0.099454000 | -0.026084000 |
| C  | 2.387828000  | 2.156032000  | -0.417650000 |
| C  | 4.611567000  | 0.461505000  | -0.106730000 |
| C  | 3.687394000  | 2.654626000  | -0.489760000 |
| C  | 4.792254000  | 1.820557000  | -0.336661000 |
| H  | 5.480233000  | -0.181026000 | 0.011618000  |
| H  | 3.841957000  | 3.714691000  | -0.666706000 |
| H  | 5.795735000  | 2.233329000  | -0.396300000 |
| C  | 0.666382000  | 0.745045000  | 3.062257000  |
| H  | 0.939591000  | 1.059910000  | 4.075772000  |
| H  | 1.389872000  | -0.002999000 | 2.727398000  |
| H  | 0.752770000  | 1.611074000  | 2.399875000  |
| C  | -0.848217000 | -1.000812000 | 4.037823000  |
| H  | -0.636640000 | -0.654674000 | 5.056215000  |
| H  | -1.847595000 | -1.448720000 | 4.035684000  |
| H  | -0.122537000 | -1.780883000 | 3.788101000  |
| C  | -1.750856000 | 1.276896000  | 3.485755000  |
| H  | -1.739113000 | 2.115656000  | 2.783403000  |
| H  | -2.774242000 | 0.889123000  | 3.531261000  |

|   |              |              |              |
|---|--------------|--------------|--------------|
| H | -1.486628000 | 1.653661000  | 4.480984000  |
| C | 1.186673000  | 3.059614000  | -0.625104000 |
| H | 0.341361000  | 2.604995000  | -0.096296000 |
| C | 3.175855000  | -1.589498000 | 0.215964000  |
| H | 2.103930000  | -1.805406000 | 0.252675000  |
| C | 3.773328000  | -2.411427000 | -0.935506000 |
| H | 4.857738000  | -2.270645000 | -1.008128000 |
| H | 3.584009000  | -3.478436000 | -0.778898000 |
| H | 3.334850000  | -2.130003000 | -1.897277000 |
| C | 3.784756000  | -2.015312000 | 1.559666000  |
| H | 3.602267000  | -3.080503000 | 1.738182000  |
| H | 4.868943000  | -1.857575000 | 1.578796000  |
| H | 3.353423000  | -1.452433000 | 2.393005000  |
| C | 1.373473000  | 4.469993000  | -0.057143000 |
| H | 2.115483000  | 5.048028000  | -0.619305000 |
| H | 0.427771000  | 5.018210000  | -0.114074000 |
| H | 1.688775000  | 4.444273000  | 0.990735000  |
| C | 0.813894000  | 3.117724000  | -2.115581000 |
| H | -0.081858000 | 3.730724000  | -2.262029000 |
| H | 1.628872000  | 3.557111000  | -2.702206000 |
| H | 0.610313000  | 2.119252000  | -2.512992000 |
| N | -0.715830000 | -2.291754000 | -0.679238000 |
| C | -1.149511000 | -3.482613000 | -0.089580000 |
| C | -0.312339000 | -2.597036000 | -1.992041000 |
| C | -1.028426000 | -4.495122000 | -1.008791000 |
| C | -0.501220000 | -3.936062000 | -2.210830000 |
| H | -1.294844000 | -5.530478000 | -0.836622000 |
| H | -0.289358000 | -4.458128000 | -3.135441000 |
| C | 0.197985000  | -1.558885000 | -2.940266000 |
| H | -0.548520000 | -0.784490000 | -3.164778000 |
| H | 1.097916000  | -1.052466000 | -2.569146000 |
| H | 0.458354000  | -2.035218000 | -3.889228000 |
| C | -1.656702000 | -3.578826000 | 1.308814000  |
| H | -0.921223000 | -3.234762000 | 2.042867000  |
| H | -2.571984000 | -2.995439000 | 1.469174000  |
| H | -1.892021000 | -4.623012000 | 1.532246000  |

**5B'**

**E = -1381.64322468**

|    |              |              |              |
|----|--------------|--------------|--------------|
| Mo | 0.555140000  | 0.569486000  | -0.118594000 |
| N  | -0.942775000 | -0.176924000 | -0.736437000 |
| O  | 2.115477000  | 0.001330000  | -1.165909000 |
| Si | 3.559027000  | -0.681929000 | -0.780857000 |
| C  | 0.783338000  | 0.008779000  | 1.521678000  |
| H  | 1.176960000  | 2.853799000  | 1.080631000  |
| C  | 0.760722000  | -0.665478000 | 2.857616000  |
| O  | 4.434504000  | 0.098555000  | 0.410852000  |
| H  | 5.129788000  | 0.644790000  | 0.030256000  |
| O  | 4.562612000  | -0.585962000 | -2.118576000 |
| H  | 4.101772000  | -0.786079000 | -2.939653000 |
| O  | 3.280642000  | -2.244780000 | -0.284176000 |
| H  | 4.033306000  | -2.623662000 | 0.180219000  |
| C  | -1.965086000 | -1.089097000 | -0.539090000 |
| C  | -3.300352000 | -0.623765000 | -0.394350000 |
| C  | -1.694244000 | -2.487787000 | -0.560813000 |
| C  | -4.324310000 | -1.556898000 | -0.227001000 |

|   |              |              |              |
|---|--------------|--------------|--------------|
| C | -2.758596000 | -3.372985000 | -0.385729000 |
| C | -4.063738000 | -2.922679000 | -0.209229000 |
| H | -5.347153000 | -1.209916000 | -0.109668000 |
| H | -2.564020000 | -4.441323000 | -0.388529000 |
| H | -4.873689000 | -3.633517000 | -0.069307000 |
| C | 1.812484000  | -1.790886000 | 2.869405000  |
| H | 1.809304000  | -2.294341000 | 3.844185000  |
| H | 1.601954000  | -2.531831000 | 2.094294000  |
| H | 2.812810000  | -1.387712000 | 2.688628000  |
| C | -0.633343000 | -1.253372000 | 3.145079000  |
| H | -0.640374000 | -1.758683000 | 4.118952000  |
| H | -1.397450000 | -0.469601000 | 3.165669000  |
| H | -0.920461000 | -1.975445000 | 2.376327000  |
| C | 1.123190000  | 0.369872000  | 3.940880000  |
| H | 2.111377000  | 0.802192000  | 3.753604000  |
| H | 0.389763000  | 1.182303000  | 3.977093000  |
| H | 1.140770000  | -0.108503000 | 4.927452000  |
| C | -0.289458000 | -2.994554000 | -0.837609000 |
| H | 0.412093000  | -2.328238000 | -0.323502000 |
| C | -3.605020000 | 0.859058000  | -0.511607000 |
| H | -2.719881000 | 1.398655000  | -0.159133000 |
| C | -3.799744000 | 1.238439000  | -1.988687000 |
| H | -4.664800000 | 0.714526000  | -2.411156000 |
| H | -3.969493000 | 2.316268000  | -2.100183000 |
| H | -2.918193000 | 0.967608000  | -2.576839000 |
| C | -4.799323000 | 1.319720000  | 0.329105000  |
| H | -4.884255000 | 2.412121000  | 0.299346000  |
| H | -5.747570000 | 0.920552000  | -0.047875000 |
| H | -4.700845000 | 1.012764000  | 1.375591000  |
| C | -0.015396000 | -4.409027000 | -0.321897000 |
| H | -0.571139000 | -5.169455000 | -0.883175000 |
| H | 1.049314000  | -4.636612000 | -0.433664000 |
| H | -0.275740000 | -4.514897000 | 0.736728000  |
| C | 0.019613000  | -2.902837000 | -2.340756000 |
| H | 1.051149000  | -3.214857000 | -2.537530000 |
| H | -0.652044000 | -3.554147000 | -2.912399000 |
| H | -0.104883000 | -1.878426000 | -2.702453000 |
| N | 0.487534000  | 2.849452000  | 0.329698000  |
| C | -0.835196000 | 3.262800000  | 0.690724000  |
| C | 0.839650000  | 3.522314000  | -0.884537000 |
| C | -1.307413000 | 4.028291000  | -0.327784000 |
| C | -0.268214000 | 4.184390000  | -1.310192000 |
| H | -2.303236000 | 4.447413000  | -0.379409000 |
| H | -0.342636000 | 4.741474000  | -2.234855000 |
| C | -1.437970000 | 2.881616000  | 1.997337000  |
| H | -1.463886000 | 1.796668000  | 2.133520000  |
| H | -0.878730000 | 3.310756000  | 2.838508000  |
| H | -2.460281000 | 3.261748000  | 2.048696000  |
| C | 2.216074000  | 3.433488000  | -1.449861000 |
| H | 2.259482000  | 4.006249000  | -2.378736000 |
| H | 2.960981000  | 3.856447000  | -0.763403000 |
| H | 2.512504000  | 2.402215000  | -1.671730000 |

5C

**E = -1500.79008346**

|    |             |              |             |
|----|-------------|--------------|-------------|
| Mo | 0.577802000 | -0.282848000 | 0.154346000 |
|----|-------------|--------------|-------------|

|    |              |              |              |
|----|--------------|--------------|--------------|
| N  | -1.146110000 | -0.046013000 | -0.115274000 |
| O  | 2.511154000  | -0.593037000 | 0.446151000  |
| Si | 4.027846000  | -0.451887000 | -0.174382000 |
| C  | 0.446335000  | -0.865792000 | 2.182709000  |
| H  | 0.797210000  | -1.898967000 | 1.991113000  |
| C  | -0.729770000 | -0.885952000 | 3.166687000  |
| O  | 5.169531000  | -1.344474000 | 0.649038000  |
| H  | 5.610568000  | -0.828448000 | 1.330860000  |
| O  | 4.579782000  | 1.113776000  | -0.122292000 |
| H  | 3.901219000  | 1.782086000  | -0.318121000 |
| O  | 3.942502000  | -1.088152000 | -1.718115000 |
| H  | 4.803764000  | -1.156312000 | -2.141676000 |
| C  | -2.474955000 | 0.216057000  | -0.389406000 |
| C  | -2.979189000 | 1.543745000  | -0.247799000 |
| C  | -3.341367000 | -0.837168000 | -0.808335000 |
| C  | -4.327308000 | 1.773718000  | -0.524188000 |
| C  | -4.677870000 | -0.538309000 | -1.070246000 |
| C  | -5.176007000 | 0.751706000  | -0.931056000 |
| H  | -4.717794000 | 2.782495000  | -0.424357000 |
| H  | -5.342293000 | -1.334131000 | -1.394880000 |
| H  | -6.221055000 | 0.960100000  | -1.143129000 |
| C  | -1.275508000 | 0.526449000  | 3.399175000  |
| H  | -2.086566000 | 0.512720000  | 4.136404000  |
| H  | -0.495750000 | 1.197124000  | 3.777964000  |
| H  | -1.668832000 | 0.946670000  | 2.470496000  |
| C  | -0.186362000 | -1.435881000 | 4.502087000  |
| H  | -0.984029000 | -1.478800000 | 5.253073000  |
| H  | 0.216370000  | -2.447909000 | 4.381576000  |
| H  | 0.613922000  | -0.800794000 | 4.898146000  |
| C  | -1.855704000 | -1.804403000 | 2.682558000  |
| H  | -2.301470000 | -1.428344000 | 1.759700000  |
| H  | -1.485241000 | -2.819833000 | 2.497882000  |
| H  | -2.649037000 | -1.872294000 | 3.435827000  |
| C  | -2.848272000 | -2.256877000 | -1.023214000 |
| H  | -1.843589000 | -2.322267000 | -0.595948000 |
| C  | -2.105476000 | 2.720836000  | 0.149827000  |
| H  | -1.122478000 | 2.332621000  | 0.429680000  |
| C  | -1.899283000 | 3.670393000  | -1.040924000 |
| H  | -2.848703000 | 4.120575000  | -1.353578000 |
| H  | -1.213003000 | 4.477889000  | -0.767527000 |
| H  | -1.470167000 | 3.149015000  | -1.899401000 |
| C  | -2.675124000 | 3.495486000  | 1.347717000  |
| H  | -1.971979000 | 4.276573000  | 1.655847000  |
| H  | -3.619896000 | 3.990533000  | 1.097909000  |
| H  | -2.858746000 | 2.845533000  | 2.207818000  |
| C  | -3.718234000 | -3.305843000 | -0.317043000 |
| H  | -4.725681000 | -3.355716000 | -0.743740000 |
| H  | -3.271267000 | -4.299625000 | -0.428029000 |
| H  | -3.817224000 | -3.095505000 | 0.751429000  |
| C  | -2.749830000 | -2.567613000 | -2.525539000 |
| H  | -2.325564000 | -3.564452000 | -2.688487000 |
| H  | -3.740280000 | -2.545204000 | -2.993921000 |
| H  | -2.123198000 | -1.838814000 | -3.048881000 |
| C  | 0.741906000  | -1.869832000 | -1.236736000 |
| H  | -0.117646000 | -1.887128000 | -1.908986000 |
| H  | 1.642435000  | -1.576967000 | -1.792440000 |

|   |              |              |              |
|---|--------------|--------------|--------------|
| C | 0.967776000  | -3.236950000 | -0.581979000 |
| H | 1.826101000  | -3.182821000 | 0.096157000  |
| H | 0.096591000  | -3.525327000 | 0.022051000  |
| C | 1.227181000  | -4.321623000 | -1.633257000 |
| H | 0.383532000  | -4.415436000 | -2.325490000 |
| H | 2.119694000  | -4.083027000 | -2.219984000 |
| H | 1.384197000  | -5.296185000 | -1.158592000 |
| H | 1.307735000  | -0.349072000 | 2.626930000  |
| N | 1.108050000  | 1.560848000  | -0.516465000 |
| C | 1.792682000  | 2.520038000  | 0.217464000  |
| C | 1.124366000  | 1.936640000  | -1.856495000 |
| C | 2.242479000  | 3.491726000  | -0.657882000 |
| C | 1.823223000  | 3.119694000  | -1.964046000 |
| H | 2.779571000  | 4.387820000  | -0.372477000 |
| H | 1.995878000  | 3.661727000  | -2.884887000 |
| C | 1.939828000  | 2.464930000  | 1.703581000  |
| H | 0.970044000  | 2.406909000  | 2.212860000  |
| H | 2.543540000  | 1.609645000  | 2.027607000  |
| H | 2.438350000  | 3.372982000  | 2.052472000  |
| C | 0.485609000  | 1.139648000  | -2.947567000 |
| H | 1.052380000  | 0.235958000  | -3.202141000 |
| H | -0.533818000 | 0.832324000  | -2.688192000 |
| H | 0.430588000  | 1.750417000  | -3.852746000 |

**TS(5A-5B)**

**E = -1381.61880838**

|    |              |              |              |
|----|--------------|--------------|--------------|
| Mo | 0.567549000  | 0.409826000  | -0.295177000 |
| N  | -1.056316000 | -0.188042000 | -0.630121000 |
| O  | 1.841099000  | -0.508649000 | -1.440617000 |
| Si | 3.221306000  | -1.378775000 | -1.197888000 |
| C  | 1.002514000  | 0.094708000  | 1.395992000  |
| H  | 1.133921000  | 1.599203000  | 0.996713000  |
| C  | 1.129092000  | -0.325987000 | 2.824842000  |
| O  | 4.388799000  | -0.638595000 | -0.264526000 |
| H  | 5.032486000  | -0.162889000 | -0.799257000 |
| O  | 3.957767000  | -1.608208000 | -2.678782000 |
| H  | 3.327150000  | -1.749245000 | -3.392257000 |
| O  | 2.792994000  | -2.791429000 | -0.432995000 |
| H  | 3.553584000  | -3.271192000 | -0.090084000 |
| C  | -2.243823000 | -0.842849000 | -0.357691000 |
| C  | -3.457253000 | -0.114540000 | -0.494708000 |
| C  | -2.255668000 | -2.221775000 | -0.012924000 |
| C  | -4.657094000 | -0.771348000 | -0.219525000 |
| C  | -3.487476000 | -2.822522000 | 0.249094000  |
| C  | -4.678939000 | -2.108907000 | 0.161647000  |
| H  | -5.593539000 | -0.228935000 | -0.308412000 |
| H  | -3.517556000 | -3.872100000 | 0.525014000  |
| H  | -5.624456000 | -2.599031000 | 0.377336000  |
| C  | 2.015071000  | -1.586466000 | 2.877528000  |
| H  | 2.129982000  | -1.912344000 | 3.918139000  |
| H  | 1.569464000  | -2.404074000 | 2.305345000  |
| H  | 3.006058000  | -1.383012000 | 2.462974000  |
| C  | -0.256862000 | -0.637545000 | 3.418901000  |
| H  | -0.155481000 | -0.987229000 | 4.453231000  |
| H  | -0.896440000 | 0.249700000  | 3.420646000  |
| H  | -0.763137000 | -1.414225000 | 2.839408000  |



|   |              |              |              |
|---|--------------|--------------|--------------|
| C | 1.809847000  | 0.801254000  | 3.626229000  |
| H | 2.801096000  | 1.027823000  | 3.221294000  |
| H | 1.215756000  | 1.721146000  | 3.615188000  |
| H | 1.929289000  | 0.494200000  | 4.671380000  |
| C | -0.969716000 | -3.027536000 | -0.016018000 |
| H | -0.169115000 | -2.375877000 | 0.352733000  |
| C | -3.440957000 | 1.313290000  | -1.014423000 |
| H | -2.514927000 | 1.781545000  | -0.663910000 |
| C | -3.383745000 | 1.311463000  | -2.551619000 |
| H | -4.282203000 | 0.845418000  | -2.971826000 |
| H | -3.318490000 | 2.334869000  | -2.938324000 |
| H | -2.513212000 | 0.754429000  | -2.910115000 |
| C | -4.607862000 | 2.171217000  | -0.518354000 |
| H | -4.457932000 | 3.213425000  | -0.818907000 |
| H | -5.564907000 | 1.850502000  | -0.944904000 |
| H | -4.698841000 | 2.141704000  | 0.572313000  |
| C | -0.998437000 | -4.262004000 | 0.888471000  |
| H | -1.682371000 | -5.031682000 | 0.513065000  |
| H | -0.001266000 | -4.711850000 | 0.927816000  |
| H | -1.300099000 | -4.013539000 | 1.911533000  |
| C | -0.604418000 | -3.424708000 | -1.456418000 |
| H | 0.362060000  | -3.937824000 | -1.476058000 |
| H | -1.366017000 | -4.093022000 | -1.874878000 |
| H | -0.533291000 | -2.543482000 | -2.100373000 |
| N | 0.693551000  | 2.548725000  | 0.159170000  |
| C | -0.273563000 | 3.369451000  | 0.765160000  |
| C | 1.518643000  | 3.358775000  | -0.639091000 |
| C | -0.063017000 | 4.652440000  | 0.333175000  |
| C | 1.062357000  | 4.646589000  | -0.543988000 |
| H | -0.642344000 | 5.514664000  | 0.637392000  |
| H | 1.496637000  | 5.501211000  | -1.046954000 |
| C | -1.252681000 | 2.857492000  | 1.767483000  |
| H | -1.766596000 | 1.950047000  | 1.437025000  |
| H | -0.773284000 | 2.628295000  | 2.728115000  |
| H | -2.008536000 | 3.623479000  | 1.958157000  |
| C | 2.663550000  | 2.803161000  | -1.419504000 |
| H | 3.227953000  | 3.625854000  | -1.865600000 |
| H | 3.353883000  | 2.227759000  | -0.790096000 |
| H | 2.346071000  | 2.144769000  | -2.238560000 |

**TS(5A-5C)**

**E = -1500.74138510**

|    |              |              |              |
|----|--------------|--------------|--------------|
| Mo | -0.581689000 | 0.378061000  | 0.252490000  |
| N  | 1.121738000  | 0.060439000  | -0.014115000 |
| O  | -2.456927000 | 0.823226000  | -0.113523000 |
| Si | -3.887973000 | 0.523086000  | -0.884102000 |
| C  | -0.624850000 | 0.704702000  | 2.154029000  |
| H  | -0.470546000 | 1.874107000  | 1.228456000  |
| C  | 0.270904000  | 0.822003000  | 3.373093000  |
| O  | -3.799992000 | -0.451394000 | -2.210444000 |
| H  | -3.222343000 | -1.230329000 | -2.126346000 |
| O  | -4.526404000 | 1.936938000  | -1.503262000 |
| H  | -4.801892000 | 2.540710000  | -0.807358000 |
| O  | -4.887430000 | -0.080979000 | 0.320099000  |
| H  | -5.653362000 | -0.534607000 | -0.046590000 |
| C  | 2.359107000  | -0.404201000 | -0.416412000 |

|   |              |              |              |
|---|--------------|--------------|--------------|
| C | 2.791980000  | -1.683157000 | 0.046851000  |
| C | 3.185208000  | 0.363461000  | -1.284928000 |
| C | 4.034979000  | -2.151622000 | -0.380079000 |
| C | 4.417306000  | -0.162410000 | -1.671360000 |
| C | 4.845895000  | -1.408477000 | -1.229424000 |
| H | 4.371204000  | -3.128597000 | -0.044007000 |
| H | 5.053933000  | 0.416473000  | -2.335049000 |
| H | 5.808220000  | -1.800121000 | -1.547252000 |
| C | 0.054484000  | -0.458973000 | 4.204970000  |
| H | 0.616557000  | -0.388824000 | 5.143076000  |
| H | -1.001839000 | -0.602902000 | 4.455479000  |
| H | 0.402057000  | -1.342850000 | 3.663639000  |
| C | -0.188423000 | 2.036060000  | 4.206717000  |
| H | 0.409251000  | 2.112501000  | 5.121718000  |
| H | -0.067113000 | 2.971790000  | 3.650797000  |
| H | -1.240763000 | 1.947400000  | 4.497415000  |
| C | 1.753210000  | 0.972398000  | 3.026098000  |
| H | 2.112997000  | 0.129584000  | 2.433484000  |
| H | 1.934397000  | 1.886566000  | 2.452453000  |
| H | 2.347337000  | 1.028653000  | 3.944719000  |
| C | 2.779338000  | 1.732290000  | -1.798543000 |
| H | 1.799170000  | 1.962516000  | -1.374269000 |
| C | 1.947550000  | -2.566854000 | 0.948981000  |
| H | 1.066380000  | -1.993500000 | 1.249686000  |
| C | 1.446159000  | -3.805894000 | 0.192316000  |
| H | 2.283644000  | -4.426618000 | -0.147191000 |
| H | 0.817574000  | -4.419511000 | 0.845855000  |
| H | 0.847025000  | -3.525013000 | -0.677666000 |
| C | 2.704318000  | -2.975955000 | 2.221498000  |
| H | 2.043412000  | -3.543859000 | 2.885345000  |
| H | 3.563526000  | -3.617256000 | 1.996394000  |
| H | 3.076027000  | -2.106848000 | 2.773470000  |
| C | 3.763413000  | 2.814599000  | -1.329190000 |
| H | 4.758707000  | 2.660208000  | -1.759505000 |
| H | 3.421499000  | 3.807788000  | -1.639320000 |
| H | 3.872878000  | 2.814077000  | -0.240087000 |
| C | 2.641316000  | 1.752901000  | -3.328033000 |
| H | 2.303608000  | 2.738019000  | -3.668222000 |
| H | 3.598525000  | 1.545265000  | -3.818411000 |
| H | 1.920686000  | 1.008007000  | -3.676441000 |
| C | -0.467278000 | 2.696494000  | -0.092764000 |
| H | -0.309859000 | 2.536077000  | -1.166947000 |
| H | -1.490723000 | 3.061205000  | 0.019228000  |
| C | 0.555252000  | 3.698143000  | 0.440384000  |
| H | 0.348601000  | 3.913331000  | 1.498000000  |
| H | 1.561186000  | 3.266257000  | 0.411903000  |
| C | 0.535262000  | 5.008644000  | -0.347549000 |
| H | 0.778601000  | 4.839420000  | -1.402224000 |
| H | -0.454021000 | 5.477142000  | -0.309452000 |
| H | 1.261193000  | 5.723490000  | 0.054064000  |
| H | -1.688200000 | 0.808908000  | 2.421444000  |
| N | -1.136066000 | -1.495036000 | -0.530867000 |
| C | -1.976585000 | -2.415719000 | 0.074567000  |
| C | -1.010696000 | -1.846378000 | -1.864520000 |
| C | -2.364538000 | -3.351640000 | -0.864875000 |
| C | -1.763198000 | -2.985679000 | -2.099904000 |

|   |              |              |              |
|---|--------------|--------------|--------------|
| H | -3.001918000 | -4.206142000 | -0.675752000 |
| H | -1.843223000 | -3.501378000 | -3.048887000 |
| C | -0.207448000 | -1.055173000 | -2.846409000 |
| H | -0.315253000 | -1.494803000 | -3.841673000 |
| H | -0.543267000 | -0.011512000 | -2.926713000 |
| H | 0.860363000  | -1.046350000 | -2.601404000 |
| C | -2.373541000 | -2.346944000 | 1.513952000  |
| H | -1.507200000 | -2.257216000 | 2.179716000  |
| H | -3.047879000 | -1.505831000 | 1.715407000  |
| H | -2.905039000 | -3.263053000 | 1.786973000  |

**TS(5A-5D)**

**E = -1500.72683739**

|    |              |              |              |
|----|--------------|--------------|--------------|
| Mo | -0.598929000 | -0.432064000 | -0.230971000 |
| N  | 0.831568000  | 0.505082000  | 0.044401000  |
| O  | -1.947552000 | 0.976207000  | -0.576825000 |
| Si | -3.072780000 | 1.782465000  | 0.294934000  |
| C  | -1.052309000 | -1.020737000 | 1.477611000  |
| H  | -1.985075000 | -1.580719000 | 1.242007000  |
| C  | -0.798361000 | -0.838626000 | 2.960450000  |
| O  | -4.236852000 | 0.845827000  | 1.045729000  |
| H  | -5.000312000 | 0.692461000  | 0.479820000  |
| O  | -3.936538000 | 2.777787000  | -0.735246000 |
| H  | -3.400244000 | 3.095129000  | -1.468565000 |
| O  | -2.297520000 | 2.613833000  | 1.513846000  |
| H  | -2.912399000 | 3.023707000  | 2.130600000  |
| C  | 1.993276000  | 1.256661000  | -0.028664000 |
| C  | 3.213453000  | 0.729756000  | 0.477947000  |
| C  | 1.945590000  | 2.560350000  | -0.595482000 |
| C  | 4.358841000  | 1.523021000  | 0.390551000  |
| C  | 3.126870000  | 3.299636000  | -0.656238000 |
| C  | 4.327601000  | 2.793567000  | -0.171788000 |
| H  | 5.298396000  | 1.132739000  | 0.772597000  |
| H  | 3.102970000  | 4.296984000  | -1.087724000 |
| H  | 5.234740000  | 3.389049000  | -0.227830000 |
| C  | -0.017256000 | 0.456563000  | 3.219228000  |
| H  | 0.147357000  | 0.580911000  | 4.296103000  |
| H  | 0.954454000  | 0.437770000  | 2.722331000  |
| H  | -0.569845000 | 1.321263000  | 2.842580000  |
| C  | -0.010511000 | -2.038511000 | 3.520687000  |
| H  | 0.180495000  | -1.887055000 | 4.589532000  |
| H  | -0.571134000 | -2.973602000 | 3.415648000  |
| H  | 0.953575000  | -2.152123000 | 3.016490000  |
| C  | -2.161230000 | -0.759076000 | 3.677058000  |
| H  | -2.764704000 | 0.064841000  | 3.287449000  |
| H  | -2.731677000 | -1.686204000 | 3.548492000  |
| H  | -2.012890000 | -0.602536000 | 4.751835000  |
| C  | 0.657096000  | 3.168138000  | -1.121843000 |
| H  | -0.145046000 | 2.442144000  | -0.967721000 |
| C  | 3.319201000  | -0.650266000 | 1.103470000  |
| H  | 2.322864000  | -1.103013000 | 1.080676000  |
| C  | 4.260803000  | -1.560223000 | 0.301646000  |
| H  | 5.285607000  | -1.171620000 | 0.301734000  |
| H  | 4.284586000  | -2.562502000 | 0.742374000  |
| H  | 3.929085000  | -1.659967000 | -0.734385000 |
| C  | 3.779445000  | -0.569541000 | 2.567359000  |

|   |              |              |              |
|---|--------------|--------------|--------------|
| H | 3.784344000  | -1.567231000 | 3.020035000  |
| H | 4.797380000  | -0.171098000 | 2.641499000  |
| H | 3.128428000  | 0.072791000  | 3.166983000  |
| C | 0.278000000  | 4.433807000  | -0.339368000 |
| H | 1.043335000  | 5.212183000  | -0.434636000 |
| H | -0.663090000 | 4.848247000  | -0.717879000 |
| H | 0.140818000  | 4.213060000  | 0.722102000  |
| C | 0.745968000  | 3.458255000  | -2.627657000 |
| H | -0.209460000 | 3.845467000  | -2.999560000 |
| H | 1.512779000  | 4.208366000  | -2.851546000 |
| H | 0.989029000  | 2.556012000  | -3.197845000 |
| C | -2.019841000 | -1.483085000 | -1.946203000 |
| H | -2.144863000 | -0.538234000 | -2.487624000 |
| H | -0.678027000 | -2.026916000 | -1.527422000 |
| C | -3.334059000 | -1.905035000 | -1.281899000 |
| H | -3.624652000 | -1.166477000 | -0.525460000 |
| H | -3.192787000 | -2.854318000 | -0.745880000 |
| C | -4.485610000 | -2.068652000 | -2.278355000 |
| H | -5.411633000 | -2.376311000 | -1.778621000 |
| H | -4.683035000 | -1.127674000 | -2.804182000 |
| H | -4.247822000 | -2.824723000 | -3.035142000 |
| H | -1.771045000 | -2.225599000 | -2.725224000 |
| N | 0.454798000  | -2.228867000 | -1.157830000 |
| C | 0.707103000  | -3.517726000 | -0.644683000 |
| C | 1.369390000  | -2.012766000 | -2.213438000 |
| C | 1.757904000  | -4.057813000 | -1.332952000 |
| C | 2.172984000  | -3.112739000 | -2.321992000 |
| H | 2.170558000  | -5.045101000 | -1.168208000 |
| H | 2.970150000  | -3.237705000 | -3.043900000 |
| C | 1.352489000  | -0.771849000 | -3.042681000 |
| H | 0.345395000  | -0.532349000 | -3.408361000 |
| H | 1.728135000  | 0.104883000  | -2.503002000 |
| H | 1.988976000  | -0.915297000 | -3.919821000 |
| C | -0.144889000 | -4.149321000 | 0.399784000  |
| H | -0.125622000 | -3.595294000 | 1.341113000  |
| H | -1.194341000 | -4.223237000 | 0.085849000  |
| H | 0.211639000  | -5.164399000 | 0.593059000  |

**TS(5C-5D)**

**E = -1500.72838008**

|    |              |              |              |
|----|--------------|--------------|--------------|
| Mo | 0.293867000  | 0.535034000  | 0.548163000  |
| N  | -1.104553000 | -0.306639000 | -0.031757000 |
| O  | 1.928358000  | -0.236934000 | 1.153255000  |
| Si | 3.332131000  | -1.125648000 | 1.085366000  |
| C  | 0.096602000  | 2.465714000  | 0.258480000  |
| H  | 0.960731000  | 2.862165000  | 0.825448000  |
| C  | -0.781843000 | 3.590639000  | -0.286893000 |
| O  | 3.759093000  | -1.598106000 | -0.431017000 |
| H  | 3.716417000  | -0.883062000 | -1.095620000 |
| O  | 3.169521000  | -2.565214000 | 1.910770000  |
| H  | 2.995378000  | -2.432063000 | 2.847588000  |
| O  | 4.450302000  | -0.139529000 | 1.841505000  |
| H  | 5.351779000  | -0.460327000 | 1.734610000  |
| C  | -1.979664000 | -1.326406000 | -0.369611000 |
| C  | -1.505110000 | -2.665129000 | -0.497049000 |
| C  | -3.352135000 | -1.018633000 | -0.582676000 |

|   |              |              |              |
|---|--------------|--------------|--------------|
| C | -2.418826000 | -3.652611000 | -0.864326000 |
| C | -4.214044000 | -2.053487000 | -0.945369000 |
| C | -3.758341000 | -3.357725000 | -1.093300000 |
| H | -2.073110000 | -4.676766000 | -0.966855000 |
| H | -5.264347000 | -1.832202000 | -1.113862000 |
| H | -4.448033000 | -4.147080000 | -1.379463000 |
| C | -1.449824000 | 3.165899000  | -1.600602000 |
| H | -2.117663000 | 3.955840000  | -1.960889000 |
| H | -0.701143000 | 2.977630000  | -2.377428000 |
| H | -2.037795000 | 2.255257000  | -1.471421000 |
| C | 0.103286000  | 4.822630000  | -0.558186000 |
| H | -0.497847000 | 5.641436000  | -0.969408000 |
| H | 0.576151000  | 5.183645000  | 0.362080000  |
| H | 0.892999000  | 4.591573000  | -1.280834000 |
| C | -1.850854000 | 3.962874000  | 0.754385000  |
| H | -2.531660000 | 3.127398000  | 0.937506000  |
| H | -1.394594000 | 4.245448000  | 1.709086000  |
| H | -2.440051000 | 4.816107000  | 0.397998000  |
| C | -3.909970000 | 0.382172000  | -0.420192000 |
| H | -3.082601000 | 1.026403000  | -0.108850000 |
| C | -0.077344000 | -3.059242000 | -0.177099000 |
| H | 0.539091000  | -2.154690000 | -0.176905000 |
| C | -0.009780000 | -3.667255000 | 1.233991000  |
| H | -0.578389000 | -4.603132000 | 1.277538000  |
| H | 1.029785000  | -3.870356000 | 1.504062000  |
| H | -0.432324000 | -2.986195000 | 1.980150000  |
| C | 0.545424000  | -4.008646000 | -1.207804000 |
| H | 1.609279000  | -4.134906000 | -0.988459000 |
| H | 0.082499000  | -5.001387000 | -1.184656000 |
| H | 0.455533000  | -3.615576000 | -2.224761000 |
| C | -4.468420000 | 0.918352000  | -1.746703000 |
| H | -5.330477000 | 0.330493000  | -2.080231000 |
| H | -4.800617000 | 1.955701000  | -1.631935000 |
| H | -3.718565000 | 0.886148000  | -2.542879000 |
| C | -4.980551000 | 0.440388000  | 0.679565000  |
| H | -5.320261000 | 1.471649000  | 0.824917000  |
| H | -5.857871000 | -0.161309000 | 0.418682000  |
| H | -4.596350000 | 0.071712000  | 1.635094000  |
| C | -0.261722000 | 0.438742000  | 2.617077000  |
| H | -0.122715000 | -0.624578000 | 2.866833000  |
| H | 0.539380000  | 0.976993000  | 3.146017000  |
| C | -1.633595000 | 0.909248000  | 3.086084000  |
| H | -1.755714000 | 1.974985000  | 2.861419000  |
| H | -2.412986000 | 0.387956000  | 2.517276000  |
| C | -1.859184000 | 0.682163000  | 4.583412000  |
| H | -1.784989000 | -0.381330000 | 4.838034000  |
| H | -1.111574000 | 1.216501000  | 5.180718000  |
| H | -2.849036000 | 1.032169000  | 4.897669000  |
| H | 0.714027000  | 1.876680000  | -0.756031000 |
| N | 1.659940000  | 0.920172000  | -1.513491000 |
| C | 1.481580000  | 0.200682000  | -2.685346000 |
| C | 2.988652000  | 1.312025000  | -1.457188000 |
| C | 2.689562000  | 0.107783000  | -3.346214000 |
| C | 3.651710000  | 0.806463000  | -2.564107000 |
| H | 2.858792000  | -0.402378000 | -4.286471000 |
| H | 4.691349000  | 0.985554000  | -2.812035000 |

|   |              |              |              |
|---|--------------|--------------|--------------|
| C | 0.160241000  | -0.348965000 | -3.113311000 |
| H | -0.638674000 | 0.397436000  | -3.034223000 |
| H | 0.216894000  | -0.663432000 | -4.159269000 |
| H | -0.156217000 | -1.218926000 | -2.528240000 |
| C | 3.529251000  | 2.251259000  | -0.423098000 |
| H | 4.609970000  | 2.351706000  | -0.554600000 |
| H | 3.100987000  | 3.257826000  | -0.522855000 |
| H | 3.365791000  | 1.910861000  | 0.604599000  |

**6A**

**E = -974.531420492**

|    |              |              |              |
|----|--------------|--------------|--------------|
| C  | -1.162084000 | -1.346400000 | 1.372517000  |
| H  | -0.290842000 | -1.705934000 | 1.956709000  |
| H  | -1.763800000 | -0.762596000 | 2.075512000  |
| C  | -1.974488000 | -2.574693000 | 0.896033000  |
| O  | 1.341534000  | -0.979515000 | -1.003736000 |
| Si | 2.988597000  | -0.861644000 | -0.942867000 |
| C  | -1.485289000 | 0.543220000  | -1.148318000 |
| H  | -1.670953000 | -0.288894000 | -1.867011000 |
| C  | -2.248353000 | 1.784724000  | -1.550894000 |
| O  | 3.611450000  | 0.655254000  | -1.220697000 |
| H  | 3.645078000  | 0.886574000  | -2.154213000 |
| O  | 3.626742000  | -1.843422000 | -2.129644000 |
| H  | 3.089958000  | -2.625163000 | -2.294462000 |
| O  | 3.445603000  | -1.288159000 | 0.598998000  |
| H  | 4.384279000  | -1.156774000 | 0.766283000  |
| C  | -2.116864000 | -3.541645000 | 2.085405000  |
| H  | -2.724209000 | -4.414311000 | 1.815261000  |
| H  | -1.138287000 | -3.904971000 | 2.420132000  |
| H  | -2.599603000 | -3.047441000 | 2.936036000  |
| C  | -3.374528000 | -2.151604000 | 0.436740000  |
| H  | -3.927803000 | -1.681760000 | 1.257989000  |
| H  | -3.322071000 | -1.429972000 | -0.383040000 |
| H  | -3.953370000 | -3.017956000 | 0.095581000  |
| C  | -1.255896000 | -3.309378000 | -0.246574000 |
| H  | -1.192987000 | -2.694223000 | -1.154200000 |
| H  | -0.235935000 | -3.591768000 | 0.039172000  |
| H  | -1.791632000 | -4.225123000 | -0.523160000 |
| C  | -2.103649000 | 2.913718000  | -0.530836000 |
| H  | -2.679533000 | 3.791285000  | -0.846727000 |
| H  | -2.463596000 | 2.596469000  | 0.452138000  |
| H  | -1.056677000 | 3.212348000  | -0.427071000 |
| C  | -3.738459000 | 1.414409000  | -1.688929000 |
| H  | -4.316993000 | 2.280295000  | -2.031818000 |
| H  | -3.883008000 | 0.607139000  | -2.416114000 |
| H  | -4.151703000 | 1.085911000  | -0.730263000 |
| C  | -1.719840000 | 2.256202000  | -2.921293000 |
| H  | -0.661774000 | 2.529762000  | -2.856364000 |
| H  | -1.819085000 | 1.469121000  | -3.677239000 |
| H  | -2.281028000 | 3.131137000  | -3.271074000 |
| C  | 0.257780000  | 1.158693000  | 0.993918000  |
| C  | 0.854211000  | 2.177694000  | 1.900672000  |
| C  | -0.236783000 | 2.917109000  | 2.696180000  |
| H  | -0.855800000 | 2.214226000  | 3.261779000  |
| H  | 0.230448000  | 3.609414000  | 3.405758000  |
| H  | -0.889634000 | 3.494371000  | 2.037099000  |

|    |              |              |              |
|----|--------------|--------------|--------------|
| C  | 1.690245000  | 3.176297000  | 1.077927000  |
| H  | 2.164785000  | 3.900532000  | 1.750324000  |
| H  | 2.469799000  | 2.659197000  | 0.511905000  |
| H  | 1.063648000  | 3.730070000  | 0.372509000  |
| C  | 1.777199000  | 1.416606000  | 2.877947000  |
| H  | 2.544863000  | 0.858008000  | 2.335887000  |
| H  | 2.266819000  | 2.129787000  | 3.551519000  |
| H  | 1.205782000  | 0.708937000  | 3.486503000  |
| Re | -0.138898000 | -0.155302000 | -0.055434000 |

**6B**

**E = -776.751289790**

|    |              |              |              |
|----|--------------|--------------|--------------|
| O  | 1.981776000  | -0.718715000 | -0.210636000 |
| Si | 3.498581000  | -0.128654000 | 0.068105000  |
| C  | -1.483558000 | -0.982924000 | -0.021590000 |
| C  | -2.716024000 | -1.789599000 | 0.054208000  |
| O  | 4.562119000  | -0.328383000 | -1.190804000 |
| H  | 4.939765000  | -1.212205000 | -1.231700000 |
| O  | 4.163540000  | -0.935642000 | 1.366186000  |
| H  | 3.503118000  | -1.179047000 | 2.022991000  |
| O  | 3.331687000  | 1.510881000  | 0.293648000  |
| H  | 4.160727000  | 1.992106000  | 0.210556000  |
| C  | -3.586756000 | -1.348954000 | 1.244424000  |
| H  | -4.448587000 | -2.018702000 | 1.339429000  |
| H  | -3.017691000 | -1.374996000 | 2.177634000  |
| H  | -3.965260000 | -0.332748000 | 1.100501000  |
| C  | -2.225604000 | -3.240343000 | 0.280910000  |
| H  | -3.093682000 | -3.906319000 | 0.335460000  |
| H  | -1.586998000 | -3.574892000 | -0.541969000 |
| H  | -1.662349000 | -3.324408000 | 1.214541000  |
| C  | -3.507859000 | -1.710516000 | -1.263918000 |
| H  | -3.847940000 | -0.690107000 | -1.460775000 |
| H  | -2.889733000 | -2.028498000 | -2.107812000 |
| H  | -4.388785000 | -2.360100000 | -1.210044000 |
| C  | -1.030885000 | 1.117862000  | -0.033029000 |
| C  | -1.825302000 | 2.356031000  | 0.056234000  |
| C  | -2.373127000 | 2.557767000  | 1.480869000  |
| H  | -1.560558000 | 2.557678000  | 2.212307000  |
| H  | -2.903300000 | 3.514692000  | 1.545029000  |
| H  | -3.072117000 | 1.761996000  | 1.753033000  |
| C  | -2.966937000 | 2.353595000  | -0.976121000 |
| H  | -3.479878000 | 3.321618000  | -0.962022000 |
| H  | -2.583434000 | 2.174999000  | -1.984289000 |
| H  | -3.705003000 | 1.579434000  | -0.745927000 |
| C  | -0.823441000 | 3.487643000  | -0.282411000 |
| H  | -0.424819000 | 3.370672000  | -1.293849000 |
| H  | -1.341508000 | 4.450838000  | -0.218745000 |
| H  | 0.014533000  | 3.498253000  | 0.420398000  |
| Re | 0.123965000  | -0.232635000 | -0.117771000 |

**6B'**

**E = -974.461562876**

|   |              |              |             |
|---|--------------|--------------|-------------|
| C | -1.844239000 | -1.188132000 | 1.310366000 |
| H | -0.912420000 | -1.752662000 | 1.456133000 |
| H | -2.111234000 | -0.801919000 | 2.298345000 |
| C | -2.950628000 | -2.062538000 | 0.693258000 |

|    |              |              |              |
|----|--------------|--------------|--------------|
| O  | 1.267110000  | -0.766517000 | -1.389671000 |
| Si | 2.697603000  | -1.446255000 | -0.934903000 |
| C  | -0.993045000 | 1.105730000  | -1.064231000 |
| H  | -1.820866000 | -0.204516000 | 0.701385000  |
| C  | -1.475692000 | 2.451032000  | -1.492833000 |
| O  | 3.431642000  | -2.006362000 | -2.327896000 |
| H  | 2.789930000  | -2.161179000 | -3.028667000 |
| O  | 2.353658000  | -2.657356000 | 0.161604000  |
| H  | 3.104271000  | -2.880270000 | 0.720751000  |
| O  | 3.827971000  | -0.458597000 | -0.208138000 |
| H  | 4.377722000  | -0.008944000 | -0.857879000 |
| C  | -3.257093000 | -3.199420000 | 1.678935000  |
| H  | -4.037769000 | -3.854978000 | 1.278312000  |
| H  | -2.369431000 | -3.813941000 | 1.866687000  |
| H  | -3.609249000 | -2.809778000 | 2.640695000  |
| C  | -4.207712000 | -1.213149000 | 0.465398000  |
| H  | -4.568473000 | -0.775529000 | 1.403303000  |
| H  | -4.008510000 | -0.396897000 | -0.238150000 |
| H  | -5.016619000 | -1.821807000 | 0.047920000  |
| C  | -2.465126000 | -2.645028000 | -0.640047000 |
| H  | -2.210070000 | -1.848388000 | -1.351423000 |
| H  | -1.581229000 | -3.278568000 | -0.500013000 |
| H  | -3.245279000 | -3.260431000 | -1.101297000 |
| C  | -0.334190000 | 3.125287000  | -2.281142000 |
| H  | -0.665327000 | 4.099450000  | -2.660413000 |
| H  | 0.543200000  | 3.279425000  | -1.646642000 |
| H  | -0.030735000 | 2.507959000  | -3.131951000 |
| C  | -1.886333000 | 3.330091000  | -0.299784000 |
| H  | -2.264455000 | 4.299050000  | -0.647590000 |
| H  | -2.676369000 | 2.849598000  | 0.287032000  |
| H  | -1.036139000 | 3.512828000  | 0.362101000  |
| C  | -2.688315000 | 2.254339000  | -2.426460000 |
| H  | -2.424994000 | 1.621829000  | -3.279127000 |
| H  | -3.520177000 | 1.779328000  | -1.895938000 |
| H  | -3.037082000 | 3.222714000  | -2.805226000 |
| C  | 0.787289000  | 0.608144000  | 1.218503000  |
| C  | 1.350778000  | 1.620501000  | 2.156047000  |
| C  | 1.967281000  | 2.776229000  | 1.346087000  |
| H  | 1.209366000  | 3.285983000  | 0.745296000  |
| H  | 2.421686000  | 3.508734000  | 2.024101000  |
| H  | 2.743415000  | 2.401469000  | 0.672913000  |
| C  | 2.453178000  | 0.947056000  | 2.999386000  |
| H  | 2.896512000  | 1.671167000  | 3.694201000  |
| H  | 2.043447000  | 0.117544000  | 3.584651000  |
| H  | 3.240672000  | 0.550944000  | 2.352821000  |
| C  | 0.239594000  | 2.149937000  | 3.081633000  |
| H  | -0.208002000 | 1.335414000  | 3.661303000  |
| H  | 0.651764000  | 2.878061000  | 3.790289000  |
| H  | -0.554166000 | 2.636022000  | 2.507588000  |
| Re | -0.094632000 | -0.118533000 | -0.136277000 |

**6B''**

**E = -895.854248185**

|    |              |              |              |
|----|--------------|--------------|--------------|
| O  | -1.280548000 | -0.678504000 | -1.271326000 |
| Si | -2.891962000 | -0.519155000 | -0.975210000 |
| C  | 1.472310000  | 0.404450000  | -1.050618000 |



|    |              |              |              |
|----|--------------|--------------|--------------|
| H  | 1.849884000  | -0.913101000 | 0.840631000  |
| C  | 2.372902000  | 1.485496000  | -1.544078000 |
| O  | -3.513256000 | -1.434495000 | 0.275330000  |
| H  | -3.794779000 | -2.303656000 | -0.027748000 |
| O  | -3.694914000 | -1.072658000 | -2.334621000 |
| H  | -3.191161000 | -0.905657000 | -3.137957000 |
| O  | -3.219224000 | 1.074578000  | -0.619354000 |
| H  | -4.112188000 | 1.190886000  | -0.279760000 |
| C  | 3.063224000  | 2.233484000  | -0.391199000 |
| H  | 3.733668000  | 3.008958000  | -0.781065000 |
| H  | 2.326917000  | 2.712637000  | 0.258667000  |
| H  | 3.660139000  | 1.547384000  | 0.219492000  |
| C  | 1.518700000  | 2.463393000  | -2.375820000 |
| H  | 2.154763000  | 3.251603000  | -2.796079000 |
| H  | 1.023015000  | 1.942827000  | -3.200541000 |
| H  | 0.745822000  | 2.930341000  | -1.759199000 |
| C  | 3.441999000  | 0.842047000  | -2.451965000 |
| H  | 4.058996000  | 0.132629000  | -1.890553000 |
| H  | 2.975020000  | 0.301330000  | -3.280275000 |
| H  | 4.102216000  | 1.613299000  | -2.866750000 |
| C  | 1.605655000  | -1.915439000 | 1.363625000  |
| H  | 2.014175000  | -1.696400000 | 2.355355000  |
| H  | 0.553953000  | -2.176917000 | 1.550609000  |
| C  | 2.368925000  | -3.023846000 | 0.643406000  |
| H  | 3.405762000  | -2.701589000 | 0.488357000  |
| H  | 1.943612000  | -3.170255000 | -0.356485000 |
| C  | 2.339532000  | -4.337968000 | 1.420789000  |
| H  | 2.899022000  | -5.116600000 | 0.894022000  |
| H  | 2.784581000  | -4.222662000 | 2.415225000  |
| H  | 1.313506000  | -4.698324000 | 1.555119000  |
| Re | 0.234575000  | -0.411904000 | -0.064913000 |
| C  | -0.355125000 | 0.628701000  | 1.243972000  |
| C  | -0.558674000 | 1.816270000  | 2.120182000  |
| C  | -1.834166000 | 1.590199000  | 2.958061000  |
| H  | -2.019924000 | 2.453285000  | 3.609043000  |
| H  | -2.698686000 | 1.451207000  | 2.304071000  |
| H  | -1.739232000 | 0.698630000  | 3.585679000  |
| C  | -0.742243000 | 3.071592000  | 1.246367000  |
| H  | -0.943285000 | 3.941461000  | 1.883456000  |
| H  | 0.156751000  | 3.277485000  | 0.659246000  |
| H  | -1.580169000 | 2.938753000  | 0.556952000  |
| C  | 0.652507000  | 1.986151000  | 3.056061000  |
| H  | 0.499387000  | 2.846516000  | 3.718171000  |
| H  | 0.791212000  | 1.099900000  | 3.684768000  |
| H  | 1.571646000  | 2.148482000  | 2.486032000  |

## 6C

**E = -1093.62118202**

|    |              |              |              |
|----|--------------|--------------|--------------|
| C  | -0.169433000 | 2.281282000  | -0.134087000 |
| H  | -0.598746000 | 2.575447000  | -1.104021000 |
| H  | -0.933376000 | 2.553034000  | 0.609538000  |
| C  | 1.096186000  | 3.132079000  | 0.122192000  |
| O  | 1.825670000  | -0.004394000 | -0.002366000 |
| Si | 3.141985000  | -0.953100000 | -0.002014000 |
| C  | -0.239142000 | -0.832583000 | 1.678695000  |
| H  | 0.378208000  | -1.720093000 | 1.458705000  |

|    |              |              |              |
|----|--------------|--------------|--------------|
| C  | -1.413384000 | -1.215400000 | 2.589180000  |
| O  | 2.976118000  | -2.402627000 | 0.822717000  |
| H  | 3.259279000  | -2.327998000 | 1.739522000  |
| O  | 4.426675000  | -0.200054000 | 0.767344000  |
| H  | 4.463112000  | 0.742896000  | 0.578676000  |
| O  | 3.494632000  | -1.351970000 | -1.586608000 |
| H  | 4.198860000  | -2.005117000 | -1.649800000 |
| C  | 0.626483000  | 4.601898000  | 0.151433000  |
| H  | 1.477766000  | 5.273715000  | 0.314078000  |
| H  | 0.151292000  | 4.888699000  | -0.793932000 |
| H  | -0.095032000 | 4.775759000  | 0.958263000  |
| C  | 1.738585000  | 2.808314000  | 1.477730000  |
| H  | 1.014353000  | 2.927245000  | 2.293447000  |
| H  | 2.115517000  | 1.783110000  | 1.495377000  |
| H  | 2.572993000  | 3.490174000  | 1.681950000  |
| C  | 2.120140000  | 2.979522000  | -1.010252000 |
| H  | 2.475028000  | 1.949290000  | -1.077726000 |
| H  | 1.678334000  | 3.253484000  | -1.976248000 |
| H  | 2.980063000  | 3.640087000  | -0.845150000 |
| C  | -2.193100000 | 0.030006000  | 3.027333000  |
| H  | -3.018890000 | -0.238823000 | 3.696266000  |
| H  | -1.542190000 | 0.727505000  | 3.568335000  |
| H  | -2.608490000 | 0.558730000  | 2.165605000  |
| C  | -0.815522000 | -1.883934000 | 3.844313000  |
| H  | -1.607923000 | -2.171581000 | 4.545431000  |
| H  | -0.254466000 | -2.788649000 | 3.584063000  |
| H  | -0.135164000 | -1.204486000 | 4.370561000  |
| C  | -2.342243000 | -2.220046000 | 1.901416000  |
| H  | -2.773433000 | -1.793322000 | 0.992470000  |
| H  | -1.797033000 | -3.128198000 | 1.618443000  |
| H  | -3.162558000 | -2.515039000 | 2.566063000  |
| C  | 0.104148000  | -0.908666000 | -1.950404000 |
| H  | -0.617716000 | -0.636045000 | -2.726885000 |
| H  | 1.112413000  | -0.628047000 | -2.277116000 |
| C  | 0.050528000  | -2.418927000 | -1.688683000 |
| H  | -0.954572000 | -2.706510000 | -1.355548000 |
| H  | 0.741740000  | -2.689781000 | -0.881576000 |
| C  | 0.427648000  | -3.218968000 | -2.939831000 |
| H  | 0.373756000  | -4.295989000 | -2.747686000 |
| H  | -0.244659000 | -2.991250000 | -3.774702000 |
| H  | 1.448566000  | -2.979047000 | -3.251482000 |
| H  | 0.435948000  | -0.147077000 | 2.225946000  |
| Re | -0.215109000 | 0.154183000  | -0.157478000 |
| C  | -1.937879000 | 0.213085000  | -0.517956000 |
| C  | -3.298224000 | 0.299164000  | -1.116048000 |
| C  | -3.258104000 | 1.399323000  | -2.200240000 |
| H  | -4.238845000 | 1.480664000  | -2.683037000 |
| H  | -3.012077000 | 2.372970000  | -1.766022000 |
| H  | -2.516006000 | 1.170658000  | -2.971199000 |
| C  | -4.351150000 | 0.677838000  | -0.056916000 |
| H  | -5.329978000 | 0.792475000  | -0.536575000 |
| H  | -4.440906000 | -0.091359000 | 0.714596000  |
| H  | -4.100239000 | 1.625068000  | 0.430316000  |
| C  | -3.677419000 | -1.045345000 | -1.769127000 |
| H  | -4.663257000 | -0.960662000 | -2.240748000 |
| H  | -2.955927000 | -1.331102000 | -2.539734000 |

H -3.723847000 -1.850639000 -1.030645000

**6D**

**E = -1182.27221308**

O -1.616334000 1.454186000 0.281957000  
Si -1.887705000 2.614833000 -0.846830000  
C -0.690216000 -1.591248000 0.698904000  
H -1.684328000 -1.583975000 1.208640000  
C -0.372393000 -2.964923000 0.157976000  
O -0.659766000 3.700752000 -1.035402000  
H -0.705681000 4.451865000 -0.436588000  
O -3.189439000 3.511135000 -0.361258000  
H -3.884218000 3.003450000 0.068124000  
O -2.090794000 1.837958000 -2.282577000  
H -2.097560000 2.415650000 -3.051257000  
C 1.008732000 -3.027057000 -0.493991000  
H 1.210558000 -4.037657000 -0.867562000  
H 1.072029000 -2.332939000 -1.336764000  
H 1.788867000 -2.760574000 0.224577000  
C -1.450031000 -3.347217000 -0.876678000  
H -1.277170000 -4.361048000 -1.257542000  
H -2.451927000 -3.321537000 -0.433715000  
H -1.439070000 -2.654897000 -1.724351000  
C -0.425715000 -3.960696000 1.334264000  
H 0.325981000 -3.713637000 2.090707000  
H -1.409163000 -3.953252000 1.817733000  
H -0.233968000 -4.980763000 0.981088000  
C 0.477682000 0.393504000 2.716393000  
H 1.364523000 -0.207354000 2.934599000  
H 0.802814000 1.448828000 2.781368000  
C -0.616402000 0.122395000 3.758091000  
H -0.858092000 -0.947847000 3.752086000  
H -1.547218000 0.646516000 3.491344000  
C -0.208648000 0.547601000 5.171396000  
H -0.997064000 0.329167000 5.900121000  
H 0.698196000 0.021609000 5.489694000  
H -0.000050000 1.622455000 5.216142000  
Re -0.233929000 0.209242000 0.748662000  
C 1.252632000 0.298990000 -0.114136000  
C 2.445558000 0.619437000 -0.946453000  
C 2.800988000 2.098975000 -0.684382000  
H 3.671281000 2.382277000 -1.288155000  
H 1.964121000 2.752340000 -0.946195000  
H 3.050790000 2.259994000 0.369107000  
C 2.098911000 0.434163000 -2.436010000  
H 2.958132000 0.717670000 -3.054916000  
H 1.848825000 -0.606801000 -2.659893000  
H 1.245984000 1.057960000 -2.717448000  
C 3.637654000 -0.273849000 -0.559202000  
H 4.521543000 0.012745000 -1.140699000  
H 3.878102000 -0.167600000 0.502900000  
H 3.425916000 -1.327376000 -0.757580000

**6D\_2**

**E = -895.929525777**

O -1.535237000 -0.949813000 -0.702795000

|    |              |              |              |
|----|--------------|--------------|--------------|
| Si | -3.046879000 | -0.320489000 | -0.926938000 |
| C  | 1.646643000  | -0.441122000 | -1.015703000 |
| H  | 1.523423000  | -1.435624000 | -1.507850000 |
| C  | 2.815016000  | 0.312757000  | -1.603875000 |
| O  | -3.804759000 | 0.202544000  | 0.459525000  |
| H  | -4.256308000 | -0.504395000 | 0.931171000  |
| O  | -4.030049000 | -1.519681000 | -1.540962000 |
| H  | -3.574302000 | -2.093532000 | -2.165070000 |
| O  | -2.879646000 | 0.999272000  | -1.921237000 |
| H  | -3.690388000 | 1.510623000  | -2.007677000 |
| C  | 3.065152000  | 1.642375000  | -0.893078000 |
| H  | 3.925637000  | 2.157010000  | -1.336032000 |
| H  | 2.193970000  | 2.297688000  | -0.978771000 |
| H  | 3.265745000  | 1.480888000  | 0.169783000  |
| C  | 2.530724000  | 0.570282000  | -3.097654000 |
| H  | 3.381799000  | 1.075346000  | -3.570205000 |
| H  | 2.355829000  | -0.367939000 | -3.636035000 |
| H  | 1.644381000  | 1.200426000  | -3.221939000 |
| C  | 4.067629000  | -0.577432000 | -1.474073000 |
| H  | 4.295793000  | -0.782760000 | -0.423283000 |
| H  | 3.929277000  | -1.536774000 | -1.985519000 |
| H  | 4.936533000  | -0.081150000 | -1.922145000 |
| C  | 0.798559000  | -1.555924000 | 1.713725000  |
| H  | 1.649914000  | -1.141651000 | 2.260362000  |
| H  | -0.058623000 | -1.528346000 | 2.412217000  |
| C  | 1.086478000  | -3.003834000 | 1.297242000  |
| H  | 2.003269000  | -3.025474000 | 0.694384000  |
| H  | 0.285689000  | -3.388803000 | 0.646687000  |
| C  | 1.236847000  | -3.948664000 | 2.492630000  |
| H  | 1.461150000  | -4.971437000 | 2.170375000  |
| H  | 2.048334000  | -3.618252000 | 3.150611000  |
| H  | 0.318707000  | -3.979992000 | 3.090159000  |
| Re | 0.142069000  | -0.377657000 | 0.089240000  |
| C  | 0.221182000  | 1.187631000  | 0.820586000  |
| C  | 0.009680000  | 2.527622000  | 1.434955000  |
| C  | -1.147418000 | 2.389315000  | 2.448305000  |
| H  | -1.342449000 | 3.360459000  | 2.918308000  |
| H  | -2.062667000 | 2.048968000  | 1.956099000  |
| H  | -0.893668000 | 1.674059000  | 3.236976000  |
| C  | -0.387038000 | 3.536960000  | 0.340599000  |
| H  | -0.593932000 | 4.512894000  | 0.795016000  |
| H  | 0.415996000  | 3.666748000  | -0.390655000 |
| H  | -1.281419000 | 3.201726000  | -0.191359000 |
| C  | 1.279020000  | 3.000959000  | 2.165443000  |
| H  | 1.088573000  | 3.964191000  | 2.652650000  |
| H  | 1.580534000  | 2.282657000  | 2.933810000  |
| H  | 2.113001000  | 3.129480000  | 1.471192000  |

**TS(6A-6B)**

**E = -974.451566984**

|    |              |              |              |
|----|--------------|--------------|--------------|
| C  | -1.450367000 | -1.143532000 | 1.405693000  |
| H  | -0.555174000 | -1.513302000 | 1.925242000  |
| H  | -1.967976000 | -0.528652000 | 2.149057000  |
| C  | -2.331242000 | -2.331984000 | 0.962254000  |
| O  | 1.363032000  | -0.883565000 | -1.228113000 |
| Si | 2.951868000  | -1.111002000 | -0.858193000 |

|    |              |              |              |
|----|--------------|--------------|--------------|
| C  | -1.330549000 | 0.652221000  | -1.106390000 |
| H  | -1.735026000 | -0.169415000 | 0.359763000  |
| C  | -2.174854000 | 1.788945000  | -1.581538000 |
| O  | 3.677932000  | -1.810828000 | -2.190821000 |
| H  | 3.044618000  | -2.298885000 | -2.726954000 |
| O  | 3.011566000  | -2.063715000 | 0.507683000  |
| H  | 3.871783000  | -2.048393000 | 0.938386000  |
| O  | 3.858172000  | 0.249641000  | -0.530320000 |
| H  | 4.197952000  | 0.657297000  | -1.333323000 |
| C  | -2.597698000 | -3.191926000 | 2.208301000  |
| H  | -3.229310000 | -4.051477000 | 1.956876000  |
| H  | -1.663816000 | -3.575783000 | 2.633916000  |
| H  | -3.111493000 | -2.615552000 | 2.986131000  |
| C  | -3.666917000 | -1.836569000 | 0.393219000  |
| H  | -4.207615000 | -1.224801000 | 1.125103000  |
| H  | -3.514238000 | -1.239628000 | -0.512104000 |
| H  | -4.310487000 | -2.681248000 | 0.125148000  |
| C  | -1.597493000 | -3.171430000 | -0.092763000 |
| H  | -1.401044000 | -2.587393000 | -1.001310000 |
| H  | -0.640629000 | -3.545249000 | 0.289693000  |
| H  | -2.200565000 | -4.037598000 | -0.387832000 |
| C  | -1.251511000 | 2.677435000  | -2.442382000 |
| H  | -1.824880000 | 3.515364000  | -2.855629000 |
| H  | -0.426127000 | 3.077351000  | -1.847448000 |
| H  | -0.826733000 | 2.107269000  | -3.274089000 |
| C  | -2.761939000 | 2.606993000  | -0.419296000 |
| H  | -3.359957000 | 3.442845000  | -0.801534000 |
| H  | -3.414704000 | 1.987770000  | 0.205937000  |
| H  | -1.969239000 | 3.011486000  | 0.215275000  |
| C  | -3.318645000 | 1.251495000  | -2.465433000 |
| H  | -2.923326000 | 0.650664000  | -3.289444000 |
| H  | -4.005864000 | 0.625551000  | -1.887365000 |
| H  | -3.895958000 | 2.083486000  | -2.886185000 |
| C  | 0.664400000  | 0.975213000  | 1.043379000  |
| C  | 1.060186000  | 2.188530000  | 1.811929000  |
| C  | 1.213977000  | 3.390444000  | 0.862287000  |
| H  | 0.263879000  | 3.638248000  | 0.381137000  |
| H  | 1.553768000  | 4.269777000  | 1.422273000  |
| H  | 1.949220000  | 3.176996000  | 0.080823000  |
| C  | 2.409563000  | 1.908232000  | 2.505340000  |
| H  | 2.730839000  | 2.786928000  | 3.077987000  |
| H  | 2.323622000  | 1.061851000  | 3.193948000  |
| H  | 3.178751000  | 1.666853000  | 1.766937000  |
| C  | -0.016978000 | 2.484648000  | 2.872465000  |
| H  | -0.140882000 | 1.635833000  | 3.552951000  |
| H  | 0.273127000  | 3.356727000  | 3.470089000  |
| H  | -0.984686000 | 2.692950000  | 2.406535000  |
| Re | -0.063856000 | -0.149312000 | -0.102068000 |

**TS(6A-6C)**

**E = -1093.56499357**

|   |              |              |              |
|---|--------------|--------------|--------------|
| C | -0.479323000 | 2.052042000  | 0.789143000  |
| H | -1.145390000 | 1.837674000  | 1.636196000  |
| H | 0.443244000  | 2.447352000  | 1.239047000  |
| C | -1.121108000 | 3.184451000  | -0.061534000 |
| O | -1.796027000 | -0.000179000 | -0.487502000 |

|    |              |              |              |
|----|--------------|--------------|--------------|
| Si | -3.083699000 | -0.991564000 | -0.378679000 |
| C  | 1.801557000  | 0.614358000  | -1.062035000 |
| H  | 1.214393000  | -0.696309000 | -1.246132000 |
| C  | 3.319153000  | 0.595605000  | -0.980619000 |
| O  | -3.560405000 | -1.748841000 | -1.790918000 |
| H  | -4.226474000 | -1.238937000 | -2.262409000 |
| O  | -4.429900000 | -0.114157000 | 0.090200000  |
| H  | -4.186866000 | 0.683896000  | 0.570431000  |
| O  | -2.713345000 | -2.227306000 | 0.690019000  |
| H  | -3.347103000 | -2.949860000 | 0.636856000  |
| C  | -0.834880000 | 4.526159000  | 0.638843000  |
| H  | -1.311658000 | 5.361452000  | 0.110061000  |
| H  | -1.216321000 | 4.518875000  | 1.666410000  |
| H  | 0.241729000  | 4.728553000  | 0.684351000  |
| C  | -0.537961000 | 3.249035000  | -1.481711000 |
| H  | 0.550970000  | 3.369279000  | -1.459828000 |
| H  | -0.777593000 | 2.342135000  | -2.052035000 |
| H  | -0.954433000 | 4.097073000  | -2.039129000 |
| C  | -2.644079000 | 3.017894000  | -0.162799000 |
| H  | -2.901031000 | 2.083659000  | -0.665064000 |
| H  | -3.097656000 | 3.016106000  | 0.837338000  |
| H  | -3.091493000 | 3.848295000  | -0.723114000 |
| C  | 3.733564000  | 2.052330000  | -0.683045000 |
| H  | 4.826463000  | 2.129958000  | -0.654518000 |
| H  | 3.370056000  | 2.739853000  | -1.454660000 |
| H  | 3.337050000  | 2.380992000  | 0.281854000  |
| C  | 3.916741000  | 0.172636000  | -2.336149000 |
| H  | 5.010704000  | 0.227172000  | -2.307273000 |
| H  | 3.641842000  | -0.856709000 | -2.589653000 |
| H  | 3.570057000  | 0.825138000  | -3.145400000 |
| C  | 3.849906000  | -0.320622000 | 0.120716000  |
| H  | 3.449735000  | -0.027895000 | 1.093606000  |
| H  | 3.569975000  | -1.363007000 | -0.062003000 |
| H  | 4.943260000  | -0.265667000 | 0.163189000  |
| C  | 0.060730000  | -1.851149000 | -1.313128000 |
| H  | -0.658403000 | -2.300702000 | -0.624184000 |
| H  | -0.480204000 | -1.581259000 | -2.227551000 |
| C  | 1.171151000  | -2.866138000 | -1.603039000 |
| H  | 1.733137000  | -3.068210000 | -0.681793000 |
| H  | 1.900156000  | -2.455553000 | -2.317467000 |
| C  | 0.622785000  | -4.181670000 | -2.158950000 |
| H  | 1.427551000  | -4.896988000 | -2.363247000 |
| H  | -0.070223000 | -4.646942000 | -1.449647000 |
| H  | 0.074346000  | -4.015588000 | -3.092455000 |
| H  | 1.493057000  | 1.077231000  | -2.020661000 |
| Re | 0.174184000  | 0.165838000  | -0.092740000 |
| C  | 0.758714000  | -0.471415000 | 1.400381000  |
| C  | 0.906140000  | -1.082014000 | 2.749537000  |
| C  | -0.494095000 | -1.193574000 | 3.386690000  |
| H  | -0.413233000 | -1.671660000 | 4.370051000  |
| H  | -0.936514000 | -0.202398000 | 3.525159000  |
| H  | -1.167678000 | -1.781884000 | 2.758183000  |
| C  | 1.807638000  | -0.194017000 | 3.628464000  |
| H  | 1.874502000  | -0.623883000 | 4.634201000  |
| H  | 2.821082000  | -0.121624000 | 3.223659000  |
| H  | 1.399268000  | 0.816950000  | 3.715919000  |

|   |             |              |             |
|---|-------------|--------------|-------------|
| C | 1.524175000 | -2.485159000 | 2.599255000 |
| H | 1.629032000 | -2.945357000 | 3.588137000 |
| H | 0.886052000 | -3.128674000 | 1.987300000 |
| H | 2.515137000 | -2.437114000 | 2.138794000 |

**TS(6A-6D)**

**E = -1093.55782774**

|    |              |              |              |
|----|--------------|--------------|--------------|
| C  | 2.415759000  | -0.195361000 | 0.707844000  |
| H  | 2.566266000  | -0.018569000 | 1.779668000  |
| H  | 2.200288000  | -1.259652000 | 0.606133000  |
| C  | 3.720019000  | 0.128030000  | -0.064425000 |
| O  | -1.345374000 | 1.285687000  | -0.654959000 |
| Si | -2.950603000 | 1.049694000  | -0.844846000 |
| C  | 0.166301000  | -1.215372000 | -1.308645000 |
| H  | 0.476165000  | -0.671647000 | -2.231710000 |
| C  | -0.001411000 | -2.684136000 | -1.619720000 |
| O  | -3.439518000 | -0.241723000 | -1.783946000 |
| H  | -3.399514000 | -0.039078000 | -2.723916000 |
| O  | -3.579144000 | 2.392713000  | -1.623431000 |
| H  | -3.106750000 | 3.196935000  | -1.385902000 |
| O  | -3.636601000 | 0.800850000  | 0.659030000  |
| H  | -4.570128000 | 0.574770000  | 0.592735000  |
| C  | 4.315075000  | 1.470943000  | 0.386863000  |
| H  | 5.280740000  | 1.644789000  | -0.101563000 |
| H  | 3.666728000  | 2.315393000  | 0.137017000  |
| H  | 4.484844000  | 1.483754000  | 1.469863000  |
| C  | 4.735294000  | -0.981128000 | 0.266517000  |
| H  | 4.912473000  | -1.045535000 | 1.346107000  |
| H  | 4.378613000  | -1.959538000 | -0.074746000 |
| H  | 5.699044000  | -0.787269000 | -0.219255000 |
| C  | 3.490139000  | 0.153197000  | -1.579845000 |
| H  | 3.082016000  | -0.797795000 | -1.933509000 |
| H  | 2.792260000  | 0.947748000  | -1.868943000 |
| H  | 4.432337000  | 0.335182000  | -2.109730000 |
| C  | -0.451885000 | -3.493156000 | -0.403662000 |
| H  | -0.533436000 | -4.556282000 | -0.658381000 |
| H  | 0.259398000  | -3.391710000 | 0.422419000  |
| H  | -1.427877000 | -3.146332000 | -0.056421000 |
| C  | 1.338418000  | -3.244073000 | -2.140220000 |
| H  | 1.223223000  | -4.294542000 | -2.432629000 |
| H  | 1.688373000  | -2.689749000 | -3.018287000 |
| H  | 2.116768000  | -3.194015000 | -1.371274000 |
| C  | -1.061644000 | -2.808830000 | -2.734272000 |
| H  | -2.014819000 | -2.383381000 | -2.408401000 |
| H  | -0.742547000 | -2.284392000 | -3.642711000 |
| H  | -1.216801000 | -3.862968000 | -2.993734000 |
| C  | 0.901972000  | 2.311868000  | 0.615469000  |
| H  | -0.056708000 | 2.473169000  | 1.123668000  |
| H  | 1.647669000  | 0.976746000  | 0.574739000  |
| C  | 1.041849000  | 3.250617000  | -0.582717000 |
| H  | 0.253011000  | 3.027437000  | -1.309701000 |
| H  | 1.997366000  | 3.073661000  | -1.096133000 |
| C  | 0.962682000  | 4.729276000  | -0.194336000 |
| H  | 1.068532000  | 5.381378000  | -1.068957000 |
| H  | 0.002035000  | 4.958081000  | 0.280831000  |

|    |              |              |             |
|----|--------------|--------------|-------------|
| H  | 1.752127000  | 4.995154000  | 0.518160000 |
| H  | 1.672563000  | 2.539465000  | 1.365782000 |
| Re | 0.132656000  | 0.134598000  | 0.022836000 |
| C  | -0.470901000 | -0.677517000 | 1.422479000 |
| C  | -1.038137000 | -1.115283000 | 2.728727000 |
| C  | -2.327241000 | -1.927807000 | 2.509658000 |
| H  | -2.122377000 | -2.869443000 | 1.994582000 |
| H  | -2.776843000 | -2.162723000 | 3.481474000 |
| H  | -3.043446000 | -1.350703000 | 1.920149000 |
| C  | -1.367588000 | 0.149885000  | 3.547923000 |
| H  | -1.781137000 | -0.137913000 | 4.521816000 |
| H  | -0.469605000 | 0.751123000  | 3.721054000 |
| H  | -2.104243000 | 0.763366000  | 3.022769000 |
| C  | 0.010224000  | -1.965521000 | 3.471172000 |
| H  | -0.390501000 | -2.276257000 | 4.442711000 |
| H  | 0.265919000  | -2.865623000 | 2.904402000 |
| H  | 0.928797000  | -1.397630000 | 3.648540000 |

**TS(6B-6D)**

**E = -1182.18995298**

|    |              |              |              |
|----|--------------|--------------|--------------|
| O  | -1.376391000 | -1.086905000 | -1.008003000 |
| Si | -2.944278000 | -0.635666000 | -1.103948000 |
| C  | 1.608598000  | -0.295425000 | -1.046203000 |
| H  | 1.747552000  | -0.806432000 | 0.627791000  |
| C  | 2.769734000  | 0.384945000  | -1.688359000 |
| O  | -3.853349000 | -0.909493000 | 0.248172000  |
| H  | -4.267164000 | -1.777521000 | 0.254998000  |
| O  | -3.650994000 | -1.555598000 | -2.287674000 |
| H  | -3.040188000 | -1.802013000 | -2.988727000 |
| O  | -2.998928000 | 0.986309000  | -1.406424000 |
| H  | -3.874719000 | 1.367083000  | -1.293575000 |
| C  | 3.451497000  | 1.394635000  | -0.750230000 |
| H  | 4.291394000  | 1.886925000  | -1.254918000 |
| H  | 2.745076000  | 2.163272000  | -0.427412000 |
| H  | 3.843418000  | 0.897486000  | 0.144017000  |
| C  | 2.220748000  | 1.110904000  | -2.934354000 |
| H  | 3.044376000  | 1.587071000  | -3.478840000 |
| H  | 1.721859000  | 0.408488000  | -3.608539000 |
| H  | 1.498461000  | 1.882281000  | -2.652732000 |
| C  | 3.790575000  | -0.683814000 | -2.129833000 |
| H  | 4.190160000  | -1.227565000 | -1.267022000 |
| H  | 3.326542000  | -1.411387000 | -2.801738000 |
| H  | 4.632870000  | -0.213887000 | -2.651622000 |
| C  | 1.230894000  | -1.517177000 | 1.717413000  |
| H  | 2.004153000  | -1.047405000 | 2.336923000  |
| H  | 0.322210000  | -1.437565000 | 2.326927000  |
| C  | 1.591783000  | -2.970607000 | 1.404057000  |
| H  | 2.489387000  | -2.996349000 | 0.773330000  |
| H  | 0.794923000  | -3.433011000 | 0.807381000  |
| C  | 1.819910000  | -3.792088000 | 2.672978000  |
| H  | 2.082559000  | -4.826255000 | 2.429162000  |
| H  | 2.634366000  | -3.372931000 | 3.274084000  |
| H  | 0.921717000  | -3.814458000 | 3.299731000  |
| Re | 0.165238000  | -0.494406000 | -0.000653000 |
| C  | -0.265429000 | 0.994826000  | 0.820753000  |
| C  | -0.359897000 | 2.422399000  | 1.233345000  |



|   |              |             |              |
|---|--------------|-------------|--------------|
| C | -1.727261000 | 2.641702000 | 1.912735000  |
| H | -1.838459000 | 3.689990000 | 2.215595000  |
| H | -2.538476000 | 2.385999000 | 1.226148000  |
| H | -1.827712000 | 2.013238000 | 2.802982000  |
| C | -0.263135000 | 3.319237000 | -0.015163000 |
| H | -0.390741000 | 4.371022000 | 0.267864000  |
| H | 0.709203000  | 3.211636000 | -0.504271000 |
| H | -1.040505000 | 3.053158000 | -0.736847000 |
| C | 0.771375000  | 2.751964000 | 2.224234000  |
| H | 0.696022000  | 3.796190000 | 2.549422000  |
| H | 0.710802000  | 2.117079000 | 3.114361000  |
| H | 1.753266000  | 2.604043000 | 1.765689000  |

**TS(6B-6D\_2)**

**E = -895.846824201**

|    |              |              |              |
|----|--------------|--------------|--------------|
| O  | -1.394327000 | -0.974949000 | -0.988072000 |
| Si | -2.995794000 | -0.610555000 | -0.866306000 |
| C  | 1.564154000  | -0.017676000 | -1.042474000 |
| H  | 1.800824000  | -0.667920000 | 0.560908000  |
| C  | 2.651064000  | 0.794552000  | -1.660024000 |
| O  | -3.729124000 | -0.996815000 | 0.580811000  |
| H  | -4.045783000 | -1.905549000 | 0.593026000  |
| O  | -3.804735000 | -1.523795000 | -2.009901000 |
| H  | -3.266510000 | -1.674242000 | -2.793825000 |
| O  | -3.179249000 | 1.030417000  | -1.077745000 |
| H  | -4.070616000 | 1.326152000  | -0.867487000 |
| C  | 3.315975000  | 1.755488000  | -0.660810000 |
| H  | 4.103039000  | 2.339069000  | -1.153136000 |
| H  | 2.584442000  | 2.450391000  | -0.241141000 |
| H  | 3.775345000  | 1.205326000  | 0.167867000  |
| C  | 1.994514000  | 1.594808000  | -2.805034000 |
| H  | 2.756156000  | 2.183708000  | -3.329072000 |
| H  | 1.518172000  | 0.925268000  | -3.527361000 |
| H  | 1.230953000  | 2.276535000  | -2.419776000 |
| C  | 3.713123000  | -0.157736000 | -2.247127000 |
| H  | 4.190849000  | -0.748796000 | -1.458322000 |
| H  | 3.261605000  | -0.850618000 | -2.962621000 |
| H  | 4.495260000  | 0.415016000  | -2.759412000 |
| C  | 1.368663000  | -1.516596000 | 1.610209000  |
| H  | 2.088608000  | -1.031702000 | 2.278893000  |
| H  | 0.458980000  | -1.610622000 | 2.218367000  |
| C  | 1.879960000  | -2.879230000 | 1.139233000  |
| H  | 2.794955000  | -2.743022000 | 0.548661000  |
| H  | 1.151143000  | -3.334445000 | 0.456106000  |
| C  | 2.147789000  | -3.827877000 | 2.307666000  |
| H  | 2.521838000  | -4.793017000 | 1.952010000  |
| H  | 2.894716000  | -3.411296000 | 2.992478000  |
| H  | 1.235509000  | -4.015161000 | 2.884493000  |
| Re | 0.169795000  | -0.397437000 | 0.035545000  |
| C  | -0.298534000 | 0.986849000  | 1.022981000  |
| C  | -0.419686000 | 2.357706000  | 1.591950000  |
| C  | -1.741290000 | 2.441551000  | 2.383175000  |
| H  | -1.865693000 | 3.445107000  | 2.807854000  |
| H  | -2.591873000 | 2.228811000  | 1.730419000  |
| H  | -1.755260000 | 1.716025000  | 3.202273000  |
| C  | -0.446966000 | 3.387128000  | 0.446619000  |

|   |              |             |              |
|---|--------------|-------------|--------------|
| H | -0.582104000 | 4.396236000 | 0.854013000  |
| H | 0.486537000  | 3.369546000 | -0.122517000 |
| H | -1.270303000 | 3.174258000 | -0.240601000 |
| C | 0.767257000  | 2.631020000 | 2.534352000  |
| H | 0.672832000  | 3.628940000 | 2.978330000  |
| H | 0.797691000  | 1.900957000 | 3.350107000  |
| H | 1.718560000  | 2.581797000 | 1.996857000  |

**TS(6C-6D)**

**E = -1093.56852404**

|    |              |              |              |
|----|--------------|--------------|--------------|
| C  | -0.181310000 | 1.781120000  | -1.179097000 |
| H  | 0.855493000  | 1.569056000  | -1.450749000 |
| H  | -0.773003000 | 1.670178000  | -2.096682000 |
| C  | -0.301749000 | 3.234360000  | -0.667145000 |
| O  | 1.640666000  | 0.534822000  | 0.589248000  |
| Si | 3.144493000  | 0.233674000  | 0.048561000  |
| C  | -2.095391000 | 0.202242000  | 0.674954000  |
| H  | -2.107961000 | 0.952894000  | 1.492216000  |
| C  | -3.522696000 | -0.218599000 | 0.374744000  |
| O  | 3.650316000  | -1.361922000 | 0.036521000  |
| H  | 3.933710000  | -1.664016000 | 0.905115000  |
| O  | 4.253655000  | 1.028133000  | 1.019128000  |
| H  | 3.879144000  | 1.820668000  | 1.415979000  |
| O  | 3.229568000  | 0.715438000  | -1.551763000 |
| H  | 4.066597000  | 0.477055000  | -1.963010000 |
| C  | -1.767633000 | 3.688002000  | -0.639331000 |
| H  | -1.845961000 | 4.740491000  | -0.343092000 |
| H  | -2.233564000 | 3.585543000  | -1.626620000 |
| H  | -2.360262000 | 3.107150000  | 0.076127000  |
| C  | 0.299176000  | 3.403660000  | 0.734816000  |
| H  | -0.244641000 | 2.810989000  | 1.482004000  |
| H  | 1.340984000  | 3.077100000  | 0.760422000  |
| H  | 0.249640000  | 4.452072000  | 1.052184000  |
| C  | 0.469333000  | 4.138484000  | -1.647254000 |
| H  | 1.528368000  | 3.862289000  | -1.681937000 |
| H  | 0.067195000  | 4.049081000  | -2.662864000 |
| H  | 0.400331000  | 5.192559000  | -1.350677000 |
| C  | -3.633014000 | -1.120296000 | -0.852053000 |
| H  | -4.676960000 | -1.409089000 | -1.017152000 |
| H  | -3.274998000 | -0.610051000 | -1.752113000 |
| H  | -3.038662000 | -2.026169000 | -0.720686000 |
| C  | -4.426963000 | 1.014615000  | 0.191020000  |
| H  | -5.470915000 | 0.703900000  | 0.071058000  |
| H  | -4.376371000 | 1.683907000  | 1.057372000  |
| H  | -4.146150000 | 1.587863000  | -0.698310000 |
| C  | -3.983750000 | -0.994929000 | 1.627358000  |
| H  | -3.361139000 | -1.879232000 | 1.791063000  |
| H  | -3.937195000 | -0.371778000 | 2.527231000  |
| H  | -5.021870000 | -1.321348000 | 1.498872000  |
| C  | 0.351428000  | -1.470495000 | 1.820943000  |
| H  | -0.362780000 | -2.302188000 | 1.882188000  |
| H  | 1.328763000  | -1.904044000 | 1.577827000  |
| C  | 0.426019000  | -0.747183000 | 3.169646000  |
| H  | -0.559439000 | -0.331782000 | 3.430386000  |
| H  | 1.111270000  | 0.106406000  | 3.089178000  |
| C  | 0.888939000  | -1.653153000 | 4.314684000  |

|    |              |              |              |
|----|--------------|--------------|--------------|
| H  | 0.927213000  | -1.113902000 | 5.268371000  |
| H  | 0.213761000  | -2.507455000 | 4.439423000  |
| H  | 1.890248000  | -2.052519000 | 4.116515000  |
| H  | -1.441030000 | 1.031934000  | -0.361284000 |
| Re | -0.232532000 | -0.139913000 | 0.215206000  |
| C  | -0.303130000 | -1.342600000 | -1.018428000 |
| C  | 0.038811000  | -2.328381000 | -2.083322000 |
| C  | 1.032251000  | -3.340647000 | -1.475694000 |
| H  | 1.320685000  | -4.066958000 | -2.244414000 |
| H  | 1.931793000  | -2.840761000 | -1.107395000 |
| H  | 0.574895000  | -3.886475000 | -0.644711000 |
| C  | 0.707451000  | -1.565401000 | -3.244806000 |
| H  | 1.012049000  | -2.277103000 | -4.020846000 |
| H  | 0.014614000  | -0.847155000 | -3.694354000 |
| H  | 1.589764000  | -1.020398000 | -2.899672000 |
| C  | -1.205751000 | -3.072748000 | -2.595381000 |
| H  | -0.903284000 | -3.784779000 | -3.371361000 |
| H  | -1.692516000 | -3.635684000 | -1.793496000 |
| H  | -1.936561000 | -2.386279000 | -3.031372000 |

#### 7A

**E = -954.476939854**

|    |              |              |              |
|----|--------------|--------------|--------------|
| C  | 1.331571000  | -1.374061000 | 1.280800000  |
| H  | 0.757434000  | -1.268260000 | 2.223013000  |
| H  | 1.125613000  | -2.419252000 | 0.967802000  |
| C  | 2.832622000  | -1.240901000 | 1.609608000  |
| O  | -1.135024000 | 0.787158000  | 0.874283000  |
| Si | -2.177271000 | 2.010442000  | 1.292682000  |
| C  | 1.192892000  | 0.722328000  | -1.260141000 |
| H  | 1.500797000  | -0.255804000 | -1.732156000 |
| C  | 1.751534000  | 1.942380000  | -1.946722000 |
| O  | -2.413239000 | 3.141306000  | 0.105186000  |
| H  | -1.803790000 | 3.884475000  | 0.157550000  |
| O  | -1.561393000 | 2.839692000  | 2.595465000  |
| H  | -1.166928000 | 2.278827000  | 3.270484000  |
| O  | -3.616375000 | 1.241193000  | 1.575998000  |
| H  | -4.372777000 | 1.835275000  | 1.606073000  |
| C  | 3.192488000  | -2.222425000 | 2.740032000  |
| H  | 4.253451000  | -2.149060000 | 3.008313000  |
| H  | 2.605200000  | -2.017498000 | 3.643035000  |
| H  | 2.994600000  | -3.258682000 | 2.441591000  |
| C  | 3.686610000  | -1.571725000 | 0.379619000  |
| H  | 3.489896000  | -2.591623000 | 0.026330000  |
| H  | 3.476495000  | -0.877965000 | -0.439762000 |
| H  | 4.754893000  | -1.503593000 | 0.616222000  |
| C  | 3.136851000  | 0.189171000  | 2.076594000  |
| H  | 2.903086000  | 0.909849000  | 1.285986000  |
| H  | 2.542465000  | 0.449019000  | 2.961598000  |
| H  | 4.194536000  | 0.300291000  | 2.343830000  |
| C  | 1.324416000  | 3.195794000  | -1.166704000 |
| H  | 1.696310000  | 4.103699000  | -1.655658000 |
| H  | 0.232458000  | 3.258073000  | -1.113582000 |
| H  | 1.716819000  | 3.173206000  | -0.144389000 |
| C  | 1.198112000  | 2.027006000  | -3.382895000 |
| H  | 1.590465000  | 2.911457000  | -3.900338000 |
| H  | 1.481710000  | 1.143667000  | -3.965862000 |

|    |              |              |              |
|----|--------------|--------------|--------------|
| H  | 0.105281000  | 2.088846000  | -3.374666000 |
| C  | 3.288931000  | 1.877610000  | -2.003311000 |
| H  | 3.717965000  | 1.823869000  | -0.998067000 |
| H  | 3.625454000  | 0.996443000  | -2.561284000 |
| H  | 3.696307000  | 2.765152000  | -2.502715000 |
| C  | -0.772922000 | -1.840400000 | -1.441232000 |
| C  | -2.077467000 | -2.564749000 | -1.028506000 |
| C  | -2.315635000 | -3.761687000 | -1.964712000 |
| H  | -1.495121000 | -4.485633000 | -1.896697000 |
| H  | -3.246617000 | -4.285443000 | -1.714432000 |
| H  | -2.385311000 | -3.434173000 | -3.008198000 |
| C  | -3.266260000 | -1.598953000 | -1.145163000 |
| H  | -4.206068000 | -2.102590000 | -0.889862000 |
| H  | -3.161916000 | -0.740802000 | -0.472155000 |
| H  | -3.359514000 | -1.217128000 | -2.168570000 |
| C  | -1.981251000 | -3.078789000 | 0.416697000  |
| H  | -1.872624000 | -2.255107000 | 1.135512000  |
| H  | -2.886934000 | -3.626813000 | 0.701716000  |
| H  | -1.128637000 | -3.756351000 | 0.543711000  |
| Ta | 0.063412000  | -0.302511000 | -0.119083000 |
| H  | 0.041812000  | -2.585400000 | -1.534427000 |
| H  | -0.890814000 | -1.432243000 | -2.455676000 |

## 7B

**E = -756.695932977**

|    |              |              |              |
|----|--------------|--------------|--------------|
| O  | 1.385897000  | -1.294467000 | -0.192659000 |
| Si | 2.943698000  | -0.920329000 | 0.213679000  |
| C  | -0.251425000 | 1.359658000  | -0.193772000 |
| C  | 0.072173000  | 2.799260000  | 0.058795000  |
| O  | 3.654935000  | 0.297127000  | -0.667757000 |
| H  | 4.057126000  | -0.017053000 | -1.483221000 |
| O  | 3.892111000  | -2.265640000 | -0.078238000 |
| H  | 3.447929000  | -3.088418000 | 0.149300000  |
| O  | 2.929068000  | -0.443182000 | 1.804213000  |
| H  | 3.750957000  | -0.021285000 | 2.073721000  |
| C  | -1.189740000 | 3.665090000  | -0.118131000 |
| H  | -0.958298000 | 4.725478000  | 0.043981000  |
| H  | -1.599044000 | 3.558367000  | -1.128695000 |
| H  | -1.967376000 | 3.376337000  | 0.596710000  |
| C  | 1.154781000  | 3.273309000  | -0.930785000 |
| H  | 1.411595000  | 4.325656000  | -0.751835000 |
| H  | 2.061088000  | 2.669820000  | -0.828420000 |
| H  | 0.800679000  | 3.181598000  | -1.963677000 |
| C  | 0.597090000  | 2.950989000  | 1.499777000  |
| H  | -0.161060000 | 2.636264000  | 2.224172000  |
| H  | 1.484520000  | 2.330242000  | 1.653239000  |
| H  | 0.859947000  | 3.996251000  | 1.707423000  |
| C  | -1.685101000 | -1.027741000 | 1.216560000  |
| C  | -2.984212000 | -0.908665000 | 0.349609000  |
| C  | -3.854121000 | -2.163620000 | 0.522444000  |
| H  | -4.134003000 | -2.280255000 | 1.574059000  |
| H  | -4.775449000 | -2.099344000 | -0.070503000 |
| H  | -3.315984000 | -3.068730000 | 0.218361000  |
| C  | -2.682982000 | -0.788738000 | -1.189983000 |
| H  | -3.593387000 | -0.495342000 | -1.722901000 |
| H  | -2.050744000 | 0.127991000  | -1.447799000 |

|    |              |              |              |
|----|--------------|--------------|--------------|
| H  | -2.358782000 | -1.733188000 | -1.649285000 |
| C  | -3.771561000 | 0.339918000  | 0.769335000  |
| H  | -3.151390000 | 1.233773000  | 0.663107000  |
| H  | -4.677984000 | 0.463331000  | 0.164210000  |
| H  | -4.076100000 | 0.254876000  | 1.817290000  |
| Ta | -0.360652000 | -0.438269000 | -0.373568000 |
| H  | -1.772096000 | -0.462158000 | 2.144860000  |
| H  | -1.491850000 | -2.083429000 | 1.467330000  |

**7B'**

**E = -954.422798652**

|    |              |              |              |
|----|--------------|--------------|--------------|
| C  | -2.942241000 | -0.457796000 | 0.015886000  |
| H  | -2.576929000 | -1.436269000 | -0.322131000 |
| H  | -3.751817000 | -0.668620000 | 0.722942000  |
| C  | -3.396388000 | 0.421996000  | -1.159277000 |
| O  | 1.245544000  | -0.152315000 | -1.227398000 |
| Si | 2.530032000  | 0.831515000  | -1.563262000 |
| C  | -0.097309000 | 1.156206000  | 1.221279000  |
| H  | -2.233014000 | 0.134807000  | 0.675504000  |
| C  | 0.206049000  | 2.305077000  | 2.130358000  |
| O  | 2.150191000  | 2.421157000  | -1.877411000 |
| H  | 2.000054000  | 2.583536000  | -2.813868000 |
| O  | 3.247085000  | 0.293381000  | -2.974760000 |
| H  | 3.294980000  | -0.666136000 | -3.029682000 |
| O  | 3.544410000  | 0.791531000  | -0.248633000 |
| H  | 4.226129000  | 1.469993000  | -0.282485000 |
| C  | -4.419518000 | -0.334592000 | -2.013743000 |
| H  | -4.749518000 | 0.277690000  | -2.860061000 |
| H  | -3.997027000 | -1.262510000 | -2.416391000 |
| H  | -5.306246000 | -0.596534000 | -1.426211000 |
| C  | -4.014499000 | 1.715657000  | -0.612232000 |
| H  | -4.896961000 | 1.501245000  | 0.000503000  |
| H  | -3.296403000 | 2.264179000  | 0.006778000  |
| H  | -4.327929000 | 2.373375000  | -1.430174000 |
| C  | -2.157239000 | 0.765373000  | -1.998648000 |
| H  | -1.416189000 | 1.320848000  | -1.384797000 |
| H  | -1.705353000 | -0.127331000 | -2.450700000 |
| H  | -2.394209000 | 1.447212000  | -2.822859000 |
| C  | -0.843054000 | 2.367688000  | 3.257631000  |
| H  | -0.630196000 | 3.200037000  | 3.940576000  |
| H  | -1.848788000 | 2.514774000  | 2.848295000  |
| H  | -0.846475000 | 1.439385000  | 3.838048000  |
| C  | 0.185127000  | 3.627592000  | 1.339854000  |
| H  | 0.417858000  | 4.477095000  | 1.995131000  |
| H  | 0.915160000  | 3.603429000  | 0.525799000  |
| H  | -0.803997000 | 3.800996000  | 0.901003000  |
| C  | 1.603458000  | 2.101048000  | 2.747329000  |
| H  | 1.635383000  | 1.179140000  | 3.336859000  |
| H  | 2.361561000  | 2.022326000  | 1.963424000  |
| H  | 1.860573000  | 2.940152000  | 3.406738000  |
| C  | 0.211404000  | -1.884880000 | 1.430944000  |
| C  | 0.526673000  | -3.284471000 | 0.850666000  |
| C  | 0.359173000  | -4.353284000 | 1.944649000  |
| H  | -0.671905000 | -4.378456000 | 2.317119000  |
| H  | 0.606326000  | -5.355381000 | 1.570920000  |
| H  | 1.015062000  | -4.141158000 | 2.796129000  |

|    |              |              |              |
|----|--------------|--------------|--------------|
| C  | 1.974537000  | -3.320133000 | 0.340656000  |
| H  | 2.225232000  | -4.305369000 | -0.071550000 |
| H  | 2.136132000  | -2.568687000 | -0.438853000 |
| H  | 2.676998000  | -3.107142000 | 1.154012000  |
| C  | -0.423394000 | -3.621982000 | -0.310615000 |
| H  | -0.296325000 | -2.925906000 | -1.153455000 |
| H  | -0.234676000 | -4.627651000 | -0.705812000 |
| H  | -1.472616000 | -3.590641000 | 0.011140000  |
| Ta | -0.214583000 | -0.231983000 | 0.066006000  |
| H  | -0.753518000 | -1.924413000 | 1.981614000  |
| H  | 0.948247000  | -1.625484000 | 2.200892000  |

**7B''**

**E = -875.816802025**

|    |              |              |              |
|----|--------------|--------------|--------------|
| O  | -0.267992000 | 1.421092000  | 0.619221000  |
| Si | -1.629571000 | 2.357878000  | 0.657331000  |
| C  | -1.074826000 | -1.287952000 | -0.663436000 |
| C  | -2.303252000 | -1.872985000 | -1.283006000 |
| O  | -2.158357000 | 2.533668000  | -0.906635000 |
| H  | -3.053512000 | 2.882760000  | -0.960869000 |
| O  | -1.248820000 | 3.805875000  | 1.400658000  |
| H  | -0.396001000 | 4.158540000  | 1.128352000  |
| O  | -2.882344000 | 1.747154000  | 1.565297000  |
| H  | -2.863804000 | 2.060989000  | 2.474663000  |
| C  | -3.429931000 | -1.975115000 | -0.236555000 |
| H  | -4.339495000 | -2.397594000 | -0.682969000 |
| H  | -3.129839000 | -2.623002000 | 0.594933000  |
| H  | -3.668545000 | -0.989593000 | 0.173885000  |
| C  | -1.992373000 | -3.277092000 | -1.837190000 |
| H  | -2.883015000 | -3.718076000 | -2.303012000 |
| H  | -1.198460000 | -3.230682000 | -2.589475000 |
| H  | -1.661013000 | -3.948599000 | -1.037252000 |
| C  | -2.759421000 | -0.959090000 | -2.437210000 |
| H  | -2.957474000 | 0.052293000  | -2.071780000 |
| H  | -1.983877000 | -0.891573000 | -3.206796000 |
| H  | -3.672237000 | -1.353280000 | -2.902119000 |
| C  | 1.094211000  | -2.106458000 | 1.771504000  |
| H  | 1.094484000  | -3.191277000 | 1.933398000  |
| H  | 2.055764000  | -1.892645000 | 1.281618000  |
| C  | 0.931601000  | -1.369982000 | 3.105791000  |
| H  | 0.170758000  | -2.103121000 | 1.072603000  |
| C  | 1.997251000  | -1.775270000 | 4.122481000  |
| H  | 1.857752000  | -1.246882000 | 5.070219000  |
| H  | 1.954717000  | -2.850209000 | 4.328843000  |
| H  | 3.003824000  | -1.544903000 | 3.756864000  |
| H  | 0.969366000  | -0.280992000 | 2.960192000  |
| H  | -0.066597000 | -1.583826000 | 3.504741000  |
| C  | 1.661108000  | -0.261617000 | -1.619441000 |
| H  | 2.032094000  | -1.310953000 | -1.583221000 |
| H  | 1.170252000  | -0.183991000 | -2.596386000 |
| Ta | 0.296711000  | -0.365951000 | 0.080658000  |
| C  | 2.861125000  | 0.710388000  | -1.545390000 |
| C  | 2.382805000  | 2.143019000  | -1.823620000 |
| H  | 1.926481000  | 2.212561000  | -2.817251000 |
| H  | 1.630042000  | 2.457460000  | -1.092879000 |
| H  | 3.216848000  | 2.854457000  | -1.786138000 |

|   |             |              |              |
|---|-------------|--------------|--------------|
| C | 3.515130000 | 0.657160000  | -0.154267000 |
| H | 2.820376000 | 0.984245000  | 0.633987000  |
| H | 3.857971000 | -0.358210000 | 0.085349000  |
| H | 4.388518000 | 1.317742000  | -0.093609000 |
| C | 3.914910000 | 0.323801000  | -2.597408000 |
| H | 3.481922000 | 0.342084000  | -3.603524000 |
| H | 4.768817000 | 1.013339000  | -2.585673000 |
| H | 4.298042000 | -0.688103000 | -2.419201000 |

**7C**

**E = -1073.57410872**

|    |              |              |              |
|----|--------------|--------------|--------------|
| C  | -0.734231000 | 1.896638000  | -0.552865000 |
| H  | -1.624258000 | 1.721268000  | -1.185978000 |
| H  | -1.136138000 | 2.342209000  | 0.375062000  |
| C  | 0.168626000  | 2.927989000  | -1.271208000 |
| O  | 1.646207000  | -0.054868000 | -0.339526000 |
| Si | 3.223754000  | -0.516298000 | -0.539436000 |
| C  | 0.149126000  | -0.888032000 | 1.976486000  |
| H  | 1.043352000  | -1.511071000 | 1.810610000  |
| C  | 0.406091000  | 0.011060000  | 3.209003000  |
| O  | 3.815394000  | -1.442399000 | 0.705560000  |
| H  | 4.297017000  | -0.932117000 | 1.364116000  |
| O  | 4.217552000  | 0.819024000  | -0.600469000 |
| H  | 3.903207000  | 1.521379000  | -1.178391000 |
| O  | 3.232981000  | -1.433790000 | -1.922704000 |
| H  | 4.047500000  | -1.931483000 | -2.045768000 |
| C  | -0.669785000 | 4.181369000  | -1.583219000 |
| H  | -0.064114000 | 4.942752000  | -2.089843000 |
| H  | -1.516672000 | 3.939630000  | -2.235361000 |
| H  | -1.069716000 | 4.627696000  | -0.665815000 |
| C  | 1.345315000  | 3.339648000  | -0.377465000 |
| H  | 0.990822000  | 3.773679000  | 0.564770000  |
| H  | 1.980436000  | 2.483355000  | -0.134592000 |
| H  | 1.962079000  | 4.098051000  | -0.874968000 |
| C  | 0.695825000  | 2.350635000  | -2.593288000 |
| H  | 1.318203000  | 1.466698000  | -2.422583000 |
| H  | -0.128832000 | 2.057191000  | -3.253736000 |
| H  | 1.297268000  | 3.093919000  | -3.130228000 |
| C  | -0.824054000 | 0.870464000  | 3.534833000  |
| H  | -0.646412000 | 1.479160000  | 4.429391000  |
| H  | -1.071721000 | 1.554298000  | 2.714786000  |
| H  | -1.704390000 | 0.246539000  | 3.725594000  |
| C  | 1.615714000  | 0.926811000  | 2.973641000  |
| H  | 1.849491000  | 1.502920000  | 3.876771000  |
| H  | 2.501657000  | 0.340032000  | 2.708950000  |
| H  | 1.437292000  | 1.640345000  | 2.162577000  |
| C  | 0.704934000  | -0.890984000 | 4.420563000  |
| H  | -0.137841000 | -1.558737000 | 4.631841000  |
| H  | 1.587360000  | -1.514564000 | 4.238107000  |
| H  | 0.894251000  | -0.293283000 | 5.320966000  |
| C  | -2.418896000 | -0.636056000 | 0.462583000  |
| C  | -3.797464000 | -0.283980000 | -0.168455000 |
| C  | -4.868041000 | -1.231201000 | 0.407650000  |
| H  | -4.903060000 | -1.162058000 | 1.500973000  |
| H  | -5.867918000 | -0.991199000 | 0.023637000  |
| H  | -4.650748000 | -2.273737000 | 0.146705000  |

|    |              |              |              |
|----|--------------|--------------|--------------|
| C  | -3.809450000 | -0.432662000 | -1.696183000 |
| H  | -4.800846000 | -0.195306000 | -2.101344000 |
| H  | -3.088787000 | 0.237664000  | -2.178863000 |
| H  | -3.571055000 | -1.458816000 | -1.998296000 |
| C  | -4.200305000 | 1.152950000  | 0.199054000  |
| H  | -3.503263000 | 1.893511000  | -0.203250000 |
| H  | -5.196432000 | 1.388813000  | -0.194413000 |
| H  | -4.233729000 | 1.282527000  | 1.287279000  |
| Ta | -0.275650000 | -0.152431000 | -0.044536000 |
| H  | -2.501266000 | -0.372247000 | 1.532148000  |
| H  | -2.346212000 | -1.743014000 | 0.491076000  |
| C  | -0.387425000 | -1.613803000 | -1.634883000 |
| H  | 0.342076000  | -1.303007000 | -2.397301000 |
| H  | -1.384456000 | -1.550671000 | -2.089013000 |
| C  | -0.094505000 | -3.057150000 | -1.201518000 |
| H  | 0.909858000  | -3.117676000 | -0.763484000 |
| H  | -0.795811000 | -3.364520000 | -0.413404000 |
| C  | -0.185903000 | -4.055925000 | -2.358898000 |
| H  | 0.028704000  | -5.076897000 | -2.023674000 |
| H  | -1.187447000 | -4.051720000 | -2.803364000 |
| H  | 0.529819000  | -3.802623000 | -3.148336000 |
| H  | -0.669865000 | -1.583642000 | 2.212021000  |

#### 7D

**E = -875.874131564**

|    |              |              |              |
|----|--------------|--------------|--------------|
| C  | -1.658801000 | -1.354496000 | -0.858641000 |
| H  | -1.093989000 | -1.816932000 | -1.693172000 |
| H  | -1.818954000 | -2.197676000 | -0.150348000 |
| C  | -3.025266000 | -0.883343000 | -1.394558000 |
| O  | 1.394209000  | -0.034410000 | -0.945685000 |
| Si | 2.988051000  | 0.349743000  | -1.209799000 |
| C  | -0.794686000 | 1.291679000  | 0.938963000  |
| H  | -1.434390000 | 0.664948000  | 1.623417000  |
| C  | -0.883822000 | 2.776735000  | 1.182543000  |
| O  | 3.464995000  | 1.791356000  | -0.546573000 |
| H  | 3.302471000  | 2.550248000  | -1.115743000 |
| O  | 3.241278000  | 0.487139000  | -2.846857000 |
| H  | 2.756000000  | -0.155980000 | -3.373121000 |
| O  | 3.845592000  | -0.859701000 | -0.468224000 |
| H  | 4.784572000  | -0.668993000 | -0.377984000 |
| C  | -3.697667000 | -2.035760000 | -2.162480000 |
| H  | -4.671576000 | -1.730436000 | -2.563912000 |
| H  | -3.077848000 | -2.364770000 | -3.005023000 |
| H  | -3.861585000 | -2.901732000 | -1.510330000 |
| C  | -3.940128000 | -0.458976000 | -0.239895000 |
| H  | -4.109436000 | -1.290526000 | 0.455388000  |
| H  | -3.499733000 | 0.371733000  | 0.318678000  |
| H  | -4.918245000 | -0.136277000 | -0.615135000 |
| C  | -2.819397000 | 0.301699000  | -2.348263000 |
| H  | -2.361603000 | 1.144133000  | -1.818939000 |
| H  | -2.162529000 | 0.026933000  | -3.182851000 |
| H  | -3.773155000 | 0.637514000  | -2.772591000 |
| C  | -0.061945000 | 3.510473000  | 0.110635000  |
| H  | -0.082813000 | 4.593571000  | 0.279199000  |
| H  | 0.981520000  | 3.179645000  | 0.132550000  |
| H  | -0.462885000 | 3.313558000  | -0.889582000 |



|    |              |              |             |
|----|--------------|--------------|-------------|
| C  | -0.310598000 | 3.107906000  | 2.574599000 |
| H  | -0.367833000 | 4.185486000  | 2.773602000 |
| H  | -0.868699000 | 2.590305000  | 3.362727000 |
| H  | 0.737372000  | 2.799933000  | 2.645598000 |
| C  | -2.347467000 | 3.249177000  | 1.113946000 |
| H  | -2.783611000 | 3.032866000  | 0.133659000 |
| H  | -2.958836000 | 2.749541000  | 1.874001000 |
| H  | -2.415412000 | 4.330086000  | 1.287829000 |
| C  | 0.319579000  | -1.597267000 | 1.942062000 |
| C  | 0.801232000  | -3.010258000 | 1.568836000 |
| C  | 1.231533000  | -3.842687000 | 2.779432000 |
| H  | 0.404027000  | -3.958730000 | 3.488496000 |
| H  | 1.564136000  | -4.844139000 | 2.483811000 |
| H  | 2.057418000  | -3.357542000 | 3.311605000 |
| Ta | -0.087317000 | -0.326371000 | 0.219237000 |
| H  | -0.529266000 | -1.657495000 | 2.640405000 |
| H  | 1.111303000  | -1.068941000 | 2.502146000 |
| H  | 0.004800000  | -3.549055000 | 1.035573000 |
| H  | 1.646231000  | -2.946983000 | 0.868573000 |

**TS(7A-7B)**

**E = -954.417905616**

|    |              |              |              |
|----|--------------|--------------|--------------|
| C  | 0.039710000  | 2.552081000  | -0.383848000 |
| H  | 1.117287000  | 2.640967000  | -0.600524000 |
| H  | -0.433569000 | 3.173425000  | -1.158017000 |
| C  | -0.320474000 | 3.161952000  | 0.992697000  |
| O  | -0.007357000 | -0.932343000 | 1.356165000  |
| Si | -1.200335000 | -1.917366000 | 1.936072000  |
| C  | -0.998116000 | -0.095855000 | -1.492912000 |
| H  | -0.652386000 | 1.574092000  | -0.939265000 |
| C  | -2.130080000 | -0.383468000 | -2.424863000 |
| O  | -2.696886000 | -1.197488000 | 2.062350000  |
| H  | -2.862916000 | -0.857141000 | 2.947160000  |
| O  | -0.823056000 | -2.351885000 | 3.505043000  |
| H  | 0.106233000  | -2.570337000 | 3.626078000  |
| O  | -1.320237000 | -3.211027000 | 0.901682000  |
| H  | -2.110188000 | -3.739453000 | 1.052904000  |
| C  | -0.094231000 | 4.681376000  | 0.921787000  |
| H  | -0.351846000 | 5.159328000  | 1.873687000  |
| H  | 0.953060000  | 4.917194000  | 0.700974000  |
| H  | -0.713530000 | 5.137114000  | 0.141111000  |
| C  | -1.798879000 | 2.880168000  | 1.302317000  |
| H  | -2.450718000 | 3.284125000  | 0.519519000  |
| H  | -2.000102000 | 1.805171000  | 1.379356000  |
| H  | -2.089526000 | 3.345664000  | 2.250864000  |
| C  | 0.560059000  | 2.586365000  | 2.111644000  |
| H  | 0.378264000  | 1.517077000  | 2.280718000  |
| H  | 1.625116000  | 2.723577000  | 1.891025000  |
| H  | 0.352062000  | 3.092965000  | 3.060658000  |
| C  | -1.934632000 | 0.378096000  | -3.750243000 |
| H  | -2.747604000 | 0.152765000  | -4.451906000 |
| H  | -1.926137000 | 1.461381000  | -3.584308000 |
| H  | -0.986176000 | 0.100675000  | -4.220625000 |
| C  | -3.471737000 | 0.027057000  | -1.787814000 |
| H  | -4.308760000 | -0.207025000 | -2.457961000 |
| H  | -3.626112000 | -0.495620000 | -0.839499000 |

|    |              |              |              |
|----|--------------|--------------|--------------|
| H  | -3.495158000 | 1.104042000  | -1.586010000 |
| C  | -2.139935000 | -1.899520000 | -2.703610000 |
| H  | -1.205030000 | -2.212429000 | -3.179118000 |
| H  | -2.247351000 | -2.462067000 | -1.771990000 |
| H  | -2.970574000 | -2.158720000 | -3.372031000 |
| C  | 2.074382000  | -0.457407000 | -1.344421000 |
| C  | 3.362049000  | -0.796052000 | -0.557868000 |
| C  | 4.575533000  | -0.768034000 | -1.502895000 |
| H  | 4.715877000  | 0.229613000  | -1.935679000 |
| H  | 5.500425000  | -1.040053000 | -0.978276000 |
| H  | 4.438661000  | -1.473116000 | -2.330160000 |
| C  | 3.238361000  | -2.201289000 | 0.050140000  |
| H  | 4.141430000  | -2.470461000 | 0.611439000  |
| H  | 2.381796000  | -2.265754000 | 0.729899000  |
| H  | 3.094511000  | -2.952501000 | -0.734471000 |
| C  | 3.591144000  | 0.223755000  | 0.569670000  |
| H  | 2.787004000  | 0.187154000  | 1.318483000  |
| H  | 4.526711000  | 0.025971000  | 1.106736000  |
| H  | 3.650312000  | 1.246585000  | 0.175329000  |
| Ta | 0.295214000  | 0.161850000  | -0.235619000 |
| H  | 2.234173000  | 0.480708000  | -1.921935000 |
| H  | 1.890211000  | -1.220221000 | -2.109593000 |

**TS(7A-7C)**

**E = -1073.52171782**

|    |              |              |              |
|----|--------------|--------------|--------------|
| C  | 0.720066000  | -2.001949000 | -1.127752000 |
| H  | 0.126242000  | -2.882648000 | -0.852407000 |
| H  | 0.536731000  | -1.874809000 | -2.211881000 |
| C  | 2.218605000  | -2.371407000 | -0.950971000 |
| O  | 0.755247000  | -0.029350000 | 1.335966000  |
| Si | 1.573872000  | 0.560646000  | 2.652365000  |
| C  | 0.114560000  | 1.322729000  | -1.661856000 |
| H  | -0.881413000 | 1.604229000  | -0.608468000 |
| C  | 0.883852000  | 2.575899000  | -2.047781000 |
| O  | 3.209166000  | 0.317930000  | 2.574058000  |
| H  | 3.490667000  | -0.569218000 | 2.818659000  |
| O  | 1.049580000  | -0.213509000 | 4.026680000  |
| H  | 0.094524000  | -0.316527000 | 4.082601000  |
| O  | 1.309152000  | 2.198627000  | 2.644570000  |
| H  | 1.902552000  | 2.684498000  | 3.226295000  |
| C  | 2.587477000  | -3.467962000 | -1.966676000 |
| H  | 3.629527000  | -3.791624000 | -1.846689000 |
| H  | 1.945967000  | -4.348154000 | -1.843916000 |
| H  | 2.465653000  | -3.107035000 | -2.994660000 |
| C  | 3.134452000  | -1.161449000 | -1.188503000 |
| H  | 2.934446000  | -0.703091000 | -2.163595000 |
| H  | 2.997718000  | -0.395684000 | -0.416911000 |
| H  | 4.190871000  | -1.457685000 | -1.168544000 |
| C  | 2.461361000  | -2.919481000 | 0.462365000  |
| H  | 2.198696000  | -2.175290000 | 1.220022000  |
| H  | 1.854508000  | -3.813709000 | 0.646679000  |
| H  | 3.514032000  | -3.195893000 | 0.601155000  |
| C  | 1.598445000  | 2.308866000  | -3.384548000 |
| H  | 2.181238000  | 3.186267000  | -3.688302000 |
| H  | 2.281275000  | 1.458154000  | -3.301101000 |
| H  | 0.879494000  | 2.090885000  | -4.182638000 |

|    |              |              |              |
|----|--------------|--------------|--------------|
| C  | 1.926333000  | 2.912962000  | -0.971143000 |
| H  | 2.464486000  | 3.831510000  | -1.232809000 |
| H  | 1.462124000  | 3.061961000  | 0.009147000  |
| H  | 2.662125000  | 2.108012000  | -0.875630000 |
| C  | -0.073875000 | 3.769577000  | -2.222154000 |
| H  | -0.853336000 | 3.550729000  | -2.960431000 |
| H  | -0.562432000 | 4.024822000  | -1.275949000 |
| H  | 0.474074000  | 4.655570000  | -2.564286000 |
| C  | -1.681571000 | 1.568174000  | 0.699007000  |
| H  | -1.987430000 | 0.840286000  | 1.459584000  |
| H  | -1.023398000 | 2.281935000  | 1.214767000  |
| C  | -2.925557000 | 2.278439000  | 0.165181000  |
| H  | -2.639818000 | 3.018721000  | -0.595472000 |
| H  | -3.570258000 | 1.557566000  | -0.355583000 |
| C  | -3.742054000 | 2.976774000  | 1.254374000  |
| H  | -4.093331000 | 2.259837000  | 2.005430000  |
| H  | -3.139056000 | 3.728859000  | 1.775548000  |
| H  | -4.621157000 | 3.481892000  | 0.837959000  |
| Ta | -0.165233000 | -0.116048000 | -0.330723000 |
| C  | -2.089945000 | -1.069098000 | -0.887309000 |
| H  | -1.848015000 | -1.566107000 | -1.843880000 |
| H  | -2.740477000 | -0.224004000 | -1.168458000 |
| C  | -2.959459000 | -2.053992000 | -0.059030000 |
| C  | -2.227014000 | -3.372369000 | 0.226255000  |
| H  | -1.911433000 | -3.864047000 | -0.700378000 |
| H  | -1.337264000 | -3.217180000 | 0.845853000  |
| H  | -2.886651000 | -4.065895000 | 0.761684000  |
| C  | -4.230565000 | -2.376581000 | -0.868233000 |
| H  | -3.976942000 | -2.832386000 | -1.832134000 |
| H  | -4.879571000 | -3.076134000 | -0.326880000 |
| H  | -4.810699000 | -1.468760000 | -1.069830000 |
| C  | -3.387161000 | -1.441654000 | 1.282162000  |
| H  | -2.522751000 | -1.263766000 | 1.932686000  |
| H  | -3.911180000 | -0.490364000 | 1.142331000  |
| H  | -4.064051000 | -2.119216000 | 1.816403000  |
| H  | -0.551299000 | 0.961537000  | -2.476813000 |

**TS(7A-7D)**

**E = -1073.51922047**

|    |              |              |              |
|----|--------------|--------------|--------------|
| C  | 0.625572000  | -1.540785000 | -1.510344000 |
| H  | 0.624003000  | -0.838283000 | -2.367843000 |
| H  | 1.657861000  | -1.916143000 | -1.470042000 |
| C  | -0.272026000 | -2.745373000 | -1.896544000 |
| O  | -1.288212000 | 0.803413000  | -0.624335000 |
| Si | -2.538212000 | 1.702301000  | -1.236718000 |
| C  | -0.376219000 | -1.076052000 | 1.722780000  |
| H  | 0.486479000  | -1.785684000 | 1.588407000  |
| C  | -1.270816000 | -1.401317000 | 2.892761000  |
| O  | -3.172820000 | 2.801117000  | -0.168128000 |
| H  | -3.882939000 | 2.436502000  | 0.369604000  |
| O  | -3.785409000 | 0.682387000  | -1.643333000 |
| H  | -3.488709000 | -0.178564000 | -1.957944000 |
| O  | -1.878616000 | 2.548069000  | -2.500753000 |
| H  | -2.439029000 | 3.261362000  | -2.821944000 |
| C  | 0.169526000  | -3.274217000 | -3.274195000 |
| H  | -0.427246000 | -4.143016000 | -3.579558000 |

|    |              |              |              |
|----|--------------|--------------|--------------|
| H  | 0.060359000  | -2.503797000 | -4.046534000 |
| H  | 1.221591000  | -3.581051000 | -3.256709000 |
| C  | -0.122206000 | -3.876413000 | -0.870562000 |
| H  | 0.921983000  | -4.204712000 | -0.802242000 |
| H  | -0.440599000 | -3.550426000 | 0.123846000  |
| H  | -0.725693000 | -4.747211000 | -1.153683000 |
| C  | -1.751232000 | -2.340314000 | -1.988661000 |
| H  | -2.134100000 | -2.019904000 | -1.012529000 |
| H  | -1.876069000 | -1.519204000 | -2.707256000 |
| H  | -2.367484000 | -3.179871000 | -2.332228000 |
| C  | -2.421543000 | -0.384572000 | 2.954430000  |
| H  | -3.080861000 | -0.598532000 | 3.803591000  |
| H  | -2.037275000 | 0.634364000  | 3.072458000  |
| H  | -3.022229000 | -0.420392000 | 2.039413000  |
| C  | -0.453098000 | -1.319542000 | 4.196665000  |
| H  | -1.085144000 | -1.541034000 | 5.065488000  |
| H  | 0.372476000  | -2.039948000 | 4.189722000  |
| H  | -0.027871000 | -0.319404000 | 4.327303000  |
| C  | -1.855922000 | -2.818830000 | 2.753201000  |
| H  | -2.449579000 | -2.909189000 | 1.837926000  |
| H  | -1.061504000 | -3.572603000 | 2.716947000  |
| H  | -2.504112000 | -3.056428000 | 3.605648000  |
| C  | 2.608694000  | -0.228314000 | 0.578706000  |
| C  | 3.796378000  | 0.353746000  | -0.228997000 |
| C  | 4.902812000  | -0.711886000 | -0.319342000 |
| H  | 4.554791000  | -1.596600000 | -0.864851000 |
| H  | 5.784540000  | -0.321893000 | -0.842437000 |
| H  | 5.220993000  | -1.035838000 | 0.678087000  |
| C  | 4.373271000  | 1.581214000  | 0.494293000  |
| H  | 5.226390000  | 1.990817000  | -0.058530000 |
| H  | 3.635680000  | 2.382387000  | 0.600160000  |
| H  | 4.723471000  | 1.314686000  | 1.498283000  |
| C  | 3.374299000  | 0.750321000  | -1.651184000 |
| H  | 2.590864000  | 1.517220000  | -1.641504000 |
| H  | 4.225285000  | 1.160645000  | -2.207462000 |
| H  | 2.996874000  | -0.110695000 | -2.211038000 |
| Ta | 0.177019000  | -0.124716000 | 0.162909000  |
| H  | 2.491478000  | -1.287352000 | 0.320037000  |
| H  | 2.867345000  | -0.228073000 | 1.646454000  |
| C  | 0.806553000  | 1.971550000  | 1.143664000  |
| H  | -0.192163000 | 1.898300000  | 1.602139000  |
| H  | 1.674725000  | 0.872082000  | 0.780249000  |
| C  | 0.870997000  | 3.163058000  | 0.184179000  |
| H  | 0.222398000  | 2.992496000  | -0.682945000 |
| H  | 1.887613000  | 3.263639000  | -0.216440000 |
| C  | 0.468538000  | 4.478934000  | 0.853419000  |
| H  | 0.550242000  | 5.320426000  | 0.156641000  |
| H  | -0.568018000 | 4.436630000  | 1.204340000  |
| H  | 1.107240000  | 4.695944000  | 1.717485000  |
| H  | 1.477482000  | 2.133278000  | 1.997934000  |

**TS(7B-7D)**

**E = -875.814289757**

|    |              |              |              |
|----|--------------|--------------|--------------|
| O  | -0.159462000 | 1.509502000  | 0.551113000  |
| Si | -1.430181000 | 2.557797000  | 0.419697000  |
| C  | -1.060586000 | -1.186790000 | -0.793585000 |

|    |              |              |              |
|----|--------------|--------------|--------------|
| C  | -2.257829000 | -1.757343000 | -1.480969000 |
| O  | -1.774737000 | 2.715826000  | -1.197063000 |
| H  | -2.612879000 | 3.160053000  | -1.359237000 |
| O  | -1.010843000 | 3.996123000  | 1.159327000  |
| H  | -0.103047000 | 4.261977000  | 0.982806000  |
| O  | -2.818637000 | 2.077876000  | 1.200847000  |
| H  | -2.864276000 | 2.407164000  | 2.103863000  |
| C  | -3.460391000 | -1.800082000 | -0.517939000 |
| H  | -4.349515000 | -2.198161000 | -1.023402000 |
| H  | -3.249009000 | -2.444279000 | 0.343569000  |
| H  | -3.691522000 | -0.798755000 | -0.142831000 |
| C  | -1.955740000 | -3.179635000 | -1.991153000 |
| H  | -2.822738000 | -3.595407000 | -2.519913000 |
| H  | -1.104048000 | -3.172343000 | -2.678429000 |
| H  | -1.714729000 | -3.852543000 | -1.160437000 |
| C  | -2.595203000 | -0.845806000 | -2.677571000 |
| H  | -2.780511000 | 0.178273000  | -2.341896000 |
| H  | -1.765907000 | -0.820393000 | -3.391431000 |
| H  | -3.487647000 | -1.215314000 | -3.197897000 |
| C  | 0.457931000  | -2.060822000 | 1.724221000  |
| H  | 0.042897000  | -3.073857000 | 1.820444000  |
| H  | 1.528733000  | -2.221920000 | 1.525586000  |
| C  | 0.218864000  | -1.309342000 | 3.044133000  |
| H  | -0.372189000 | -1.946681000 | 0.698728000  |
| C  | 0.609974000  | -2.133889000 | 4.272223000  |
| H  | 0.429104000  | -1.576547000 | 5.196880000  |
| H  | 0.029689000  | -3.061714000 | 4.320847000  |
| H  | 1.671116000  | -2.404224000 | 4.245448000  |
| H  | 0.777852000  | -0.363062000 | 3.056107000  |
| H  | -0.841448000 | -1.035004000 | 3.114681000  |
| C  | 1.915755000  | -0.485961000 | -1.348893000 |
| H  | 2.167640000  | -1.559922000 | -1.208484000 |
| H  | 1.605271000  | -0.415216000 | -2.398114000 |
| Ta | 0.284886000  | -0.338045000 | 0.097764000  |
| C  | 3.179853000  | 0.370905000  | -1.104458000 |
| C  | 2.910897000  | 1.822374000  | -1.527979000 |
| H  | 2.649007000  | 1.874392000  | -2.590602000 |
| H  | 2.077887000  | 2.252199000  | -0.960827000 |
| H  | 3.794523000  | 2.452133000  | -1.367745000 |
| C  | 3.569412000  | 0.344054000  | 0.383886000  |
| H  | 2.792177000  | 0.798243000  | 1.017336000  |
| H  | 3.743064000  | -0.682232000 | 0.732688000  |
| H  | 4.489292000  | 0.911741000  | 0.568897000  |
| C  | 4.355556000  | -0.180095000 | -1.929235000 |
| H  | 4.110806000  | -0.186210000 | -2.997087000 |
| H  | 5.261008000  | 0.425484000  | -1.794843000 |
| H  | 4.593719000  | -1.209751000 | -1.637088000 |

**TS(7C-7D)**

**E = -1073.51908709**

|    |              |              |              |
|----|--------------|--------------|--------------|
| C  | 1.185136000  | -1.920271000 | -0.129205000 |
| H  | 0.231424000  | -2.332051000 | 0.228636000  |
| H  | 1.366705000  | -2.418440000 | -1.089774000 |
| C  | 2.271060000  | -2.367938000 | 0.880003000  |
| O  | -0.396591000 | 0.319775000  | 1.419654000  |
| Si | -1.401822000 | 0.279812000  | 2.744665000  |

|    |              |              |              |
|----|--------------|--------------|--------------|
| C  | 1.652924000  | 0.949134000  | -1.127824000 |
| H  | 1.495316000  | 0.690862000  | -2.201861000 |
| C  | 2.864957000  | 1.844945000  | -0.939145000 |
| O  | -1.421227000 | -1.178514000 | 3.535278000  |
| H  | -2.160616000 | -1.738593000 | 3.277762000  |
| O  | -2.973537000 | 0.531945000  | 2.258478000  |
| H  | -3.071639000 | 1.218561000  | 1.589710000  |
| O  | -0.780398000 | 1.428272000  | 3.760337000  |
| H  | -1.123683000 | 1.375023000  | 4.657669000  |
| C  | 2.131237000  | -3.888275000 | 1.085496000  |
| H  | 2.894192000  | -4.264848000 | 1.778110000  |
| H  | 1.149153000  | -4.139954000 | 1.501743000  |
| H  | 2.242540000  | -4.427797000 | 0.137810000  |
| C  | 3.674908000  | -2.086556000 | 0.330849000  |
| H  | 3.821078000  | -2.555495000 | -0.649690000 |
| H  | 3.853163000  | -1.012858000 | 0.221238000  |
| H  | 4.444819000  | -2.477362000 | 1.006124000  |
| C  | 2.103184000  | -1.675981000 | 2.238810000  |
| H  | 2.219585000  | -0.590768000 | 2.158737000  |
| H  | 1.114081000  | -1.869622000 | 2.665427000  |
| H  | 2.853955000  | -2.040314000 | 2.950303000  |
| C  | 4.093069000  | 1.290375000  | -1.684070000 |
| H  | 4.950390000  | 1.962637000  | -1.563516000 |
| H  | 4.384893000  | 0.304600000  | -1.312369000 |
| H  | 3.889928000  | 1.197379000  | -2.757065000 |
| C  | 3.184644000  | 2.025898000  | 0.551092000  |
| H  | 4.014008000  | 2.730086000  | 0.681347000  |
| H  | 2.318636000  | 2.417695000  | 1.094920000  |
| H  | 3.475762000  | 1.080191000  | 1.018203000  |
| C  | 2.514454000  | 3.218910000  | -1.546042000 |
| H  | 2.250025000  | 3.129891000  | -2.605568000 |
| H  | 1.669472000  | 3.675743000  | -1.023251000 |
| H  | 3.373012000  | 3.896853000  | -1.469722000 |
| C  | -1.655908000 | 1.679266000  | -0.913392000 |
| H  | -1.595193000 | 1.899745000  | -1.991331000 |
| H  | -2.668551000 | 1.271970000  | -0.772671000 |
| C  | -1.530469000 | 3.009154000  | -0.146417000 |
| H  | -1.635781000 | 2.842269000  | 0.935831000  |
| H  | -0.518489000 | 3.419128000  | -0.265774000 |
| C  | -2.543808000 | 4.070280000  | -0.584741000 |
| H  | -2.421492000 | 4.310199000  | -1.646995000 |
| H  | -3.572351000 | 3.715026000  | -0.448523000 |
| H  | -2.432053000 | 5.000369000  | -0.015192000 |
| H  | 1.720815000  | -0.479341000 | -0.607740000 |
| Ta | -0.045534000 | 0.208650000  | -0.441956000 |
| C  | -0.925213000 | -0.979135000 | -2.101837000 |
| H  | -1.111062000 | -0.199110000 | -2.861935000 |
| H  | -0.082597000 | -1.566036000 | -2.504411000 |
| C  | -2.163153000 | -1.915626000 | -2.090719000 |
| C  | -3.438606000 | -1.178862000 | -1.660541000 |
| H  | -3.379728000 | -0.848582000 | -0.618006000 |
| H  | -3.624121000 | -0.298879000 | -2.285577000 |
| H  | -4.309163000 | -1.840131000 | -1.747641000 |
| C  | -2.373960000 | -2.455219000 | -3.518404000 |
| H  | -3.237669000 | -3.130071000 | -3.564577000 |
| H  | -2.550184000 | -1.636463000 | -4.225389000 |

|   |              |              |              |
|---|--------------|--------------|--------------|
| H | -1.495062000 | -3.011788000 | -3.863826000 |
| C | -1.958005000 | -3.112102000 | -1.150876000 |
| H | -1.050165000 | -3.672275000 | -1.398562000 |
| H | -1.882089000 | -2.792334000 | -0.104958000 |
| H | -2.806415000 | -3.803747000 | -1.218391000 |

**8A**

**E = -1289.6040940**

|    |              |              |              |
|----|--------------|--------------|--------------|
| C  | -0.890639000 | -2.041177000 | -1.139684000 |
| H  | -0.790364000 | -1.738705000 | -2.202028000 |
| H  | -0.029967000 | -2.694023000 | -0.947915000 |
| C  | -2.190134000 | -2.869622000 | -0.994304000 |
| N  | 1.198990000  | -0.008350000 | -0.232365000 |
| O  | -1.723992000 | 1.157846000  | -0.928610000 |
| Si | -2.971912000 | 2.170767000  | -0.518869000 |
| C  | -0.932222000 | -0.472292000 | 1.657312000  |
| H  | -2.045123000 | -0.438513000 | 1.653387000  |
| C  | -0.360249000 | -0.580599000 | 3.054410000  |
| O  | -4.080821000 | 1.493342000  | 0.518557000  |
| H  | -4.807300000 | 1.058928000  | 0.060015000  |
| O  | -3.822831000 | 2.552235000  | -1.896974000 |
| H  | -3.266649000 | 2.699724000  | -2.668412000 |
| O  | -2.275939000 | 3.464918000  | 0.247807000  |
| H  | -2.903746000 | 3.998930000  | 0.744625000  |
| C  | 2.530391000  | 0.350293000  | -0.317526000 |
| C  | 3.512508000  | -0.669091000 | -0.416486000 |
| C  | 2.899105000  | 1.721807000  | -0.291596000 |
| C  | 4.852477000  | -0.289883000 | -0.505315000 |
| C  | 4.254682000  | 2.039974000  | -0.377001000 |
| C  | 5.226234000  | 1.049554000  | -0.486749000 |
| H  | 5.618425000  | -1.055626000 | -0.586642000 |
| H  | 4.559480000  | 3.082047000  | -0.356655000 |
| H  | 6.275814000  | 1.322952000  | -0.553917000 |
| C  | -2.223054000 | -3.914725000 | -2.124623000 |
| H  | -3.117568000 | -4.545631000 | -2.054064000 |
| H  | -2.229754000 | -3.433667000 | -3.109738000 |
| H  | -1.346171000 | -4.570270000 | -2.078669000 |
| C  | -2.220264000 | -3.601915000 | 0.351563000  |
| H  | -1.364326000 | -4.280117000 | 0.446542000  |
| H  | -2.180820000 | -2.897411000 | 1.186525000  |
| H  | -3.133478000 | -4.200853000 | 0.448762000  |
| C  | -3.433124000 | -1.976307000 | -1.120773000 |
| H  | -3.491032000 | -1.251656000 | -0.299595000 |
| H  | -3.427793000 | -1.418923000 | -2.064901000 |
| H  | -4.350767000 | -2.575775000 | -1.090916000 |
| C  | 1.166855000  | -0.705252000 | 3.027206000  |
| H  | 1.560408000  | -0.777303000 | 4.047817000  |
| H  | 1.478112000  | -1.598742000 | 2.477308000  |
| H  | 1.625921000  | 0.160813000  | 2.542701000  |
| C  | -0.959566000 | -1.814573000 | 3.755311000  |
| H  | -0.588959000 | -1.886547000 | 4.784736000  |
| H  | -2.053310000 | -1.756946000 | 3.796640000  |
| H  | -0.686710000 | -2.735668000 | 3.231029000  |
| C  | -0.756534000 | 0.685494000  | 3.840829000  |
| H  | -0.341288000 | 1.581478000  | 3.368816000  |
| H  | -1.845115000 | 0.800998000  | 3.884838000  |

|   |              |              |              |
|---|--------------|--------------|--------------|
| H | -0.380215000 | 0.632469000  | 4.869784000  |
| C | 1.842039000  | 2.807777000  | -0.216302000 |
| H | 0.983692000  | 2.390886000  | 0.325163000  |
| C | 3.105517000  | -2.129521000 | -0.474280000 |
| H | 2.125845000  | -2.202577000 | 0.011206000  |
| C | 2.933922000  | -2.577791000 | -1.934681000 |
| H | 3.884664000  | -2.509816000 | -2.475764000 |
| H | 2.590146000  | -3.617267000 | -1.985841000 |
| H | 2.204835000  | -1.951639000 | -2.457668000 |
| C | 4.064395000  | -3.062282000 | 0.272785000  |
| H | 3.649415000  | -4.075272000 | 0.308313000  |
| H | 5.039996000  | -3.134006000 | -0.220758000 |
| H | 4.230758000  | -2.727544000 | 1.301429000  |
| C | 2.287663000  | 4.055010000  | 0.552821000  |
| H | 3.063668000  | 4.614543000  | 0.018394000  |
| H | 1.436883000  | 4.731000000  | 0.684902000  |
| H | 2.676864000  | 3.799961000  | 1.543617000  |
| C | 1.361309000  | 3.183978000  | -1.627239000 |
| H | 0.550292000  | 3.917964000  | -1.574043000 |
| H | 2.182067000  | 3.618331000  | -2.209438000 |
| H | 0.992748000  | 2.307625000  | -2.169102000 |
| W | -0.545067000 | -0.154815000 | -0.164596000 |

## 8B

**E = -1091.8018100**

|    |              |              |              |
|----|--------------|--------------|--------------|
| N  | -0.809582000 | 0.412678000  | -0.725466000 |
| O  | 2.157995000  | 0.402868000  | -1.010070000 |
| Si | 3.446708000  | 0.842493000  | -0.059963000 |
| C  | 0.695303000  | -1.768135000 | 0.433349000  |
| C  | 0.512779000  | -2.420860000 | 1.760758000  |
| O  | 2.999822000  | 2.210307000  | 0.764484000  |
| H  | 3.578873000  | 2.412776000  | 1.505928000  |
| O  | 4.741616000  | 1.070966000  | -1.083468000 |
| H  | 4.515104000  | 1.574590000  | -1.871895000 |
| O  | 3.924097000  | -0.267708000 | 1.073739000  |
| H  | 4.172840000  | -1.122484000 | 0.709195000  |
| C  | -1.936100000 | 0.842787000  | -0.061606000 |
| C  | -1.919847000 | 2.103565000  | 0.593004000  |
| C  | -3.116593000 | 0.050307000  | -0.092880000 |
| C  | -3.088537000 | 2.534995000  | 1.218624000  |
| C  | -4.261501000 | 0.542214000  | 0.534603000  |
| C  | -4.252081000 | 1.769575000  | 1.190469000  |
| H  | -3.094042000 | 3.489137000  | 1.736794000  |
| H  | -5.175307000 | -0.044081000 | 0.518637000  |
| H  | -5.152404000 | 2.130556000  | 1.680232000  |
| C  | -0.147967000 | -1.430091000 | 2.738010000  |
| H  | -0.296953000 | -1.904704000 | 3.715578000  |
| H  | 0.482520000  | -0.547371000 | 2.879591000  |
| H  | -1.118753000 | -1.096775000 | 2.361312000  |
| C  | 1.873073000  | -2.874788000 | 2.324302000  |
| H  | 1.739325000  | -3.361824000 | 3.297915000  |
| H  | 2.353716000  | -3.591566000 | 1.649633000  |
| H  | 2.540887000  | -2.018919000 | 2.453142000  |
| C  | -0.398497000 | -3.650992000 | 1.573381000  |
| H  | -1.385397000 | -3.357644000 | 1.203118000  |
| H  | 0.038060000  | -4.362161000 | 0.863987000  |



|   |              |              |              |
|---|--------------|--------------|--------------|
| H | -0.532403000 | -4.167698000 | 2.531205000  |
| C | -3.127709000 | -1.263530000 | -0.853298000 |
| H | -2.132697000 | -1.717157000 | -0.707107000 |
| C | -0.658600000 | 2.948430000  | 0.567391000  |
| H | 0.196597000  | 2.265839000  | 0.617572000  |
| C | -0.553812000 | 3.703286000  | -0.768557000 |
| H | -1.383306000 | 4.411077000  | -0.881806000 |
| H | 0.384918000  | 4.265895000  | -0.817289000 |
| H | -0.578461000 | 3.007779000  | -1.612180000 |
| C | -0.535929000 | 3.918379000  | 1.744767000  |
| H | 0.452408000  | 4.388441000  | 1.730996000  |
| H | -1.278233000 | 4.723620000  | 1.696116000  |
| H | -0.653517000 | 3.406572000  | 2.705657000  |
| C | -4.157831000 | -2.273404000 | -0.342502000 |
| H | -5.183215000 | -1.949962000 | -0.553659000 |
| H | -4.018449000 | -3.238710000 | -0.840460000 |
| H | -4.069449000 | -2.430612000 | 0.736922000  |
| C | -3.314394000 | -1.020653000 | -2.360975000 |
| H | -3.245391000 | -1.960617000 | -2.921717000 |
| H | -4.299755000 | -0.584328000 | -2.558290000 |
| H | -2.562108000 | -0.326533000 | -2.749040000 |
| W | 0.579175000  | -0.683443000 | -0.977201000 |

### 8B'

**E = -1289.5408379**

|    |              |              |              |
|----|--------------|--------------|--------------|
| C  | 1.132865000  | 2.746848000  | -0.476132000 |
| H  | 0.687389000  | 2.472754000  | -1.440493000 |
| H  | 0.550438000  | 3.606190000  | -0.126409000 |
| C  | 2.634596000  | 3.056188000  | -0.592294000 |
| N  | -1.137840000 | 0.192010000  | -0.683486000 |
| O  | 1.449302000  | -1.294020000 | -1.109020000 |
| Si | 2.367045000  | -2.575066000 | -0.614214000 |
| C  | 0.739637000  | 0.017347000  | 1.510669000  |
| H  | 0.971602000  | 2.054221000  | 0.430629000  |
| C  | 0.496983000  | -0.239816000 | 2.958667000  |
| O  | 3.840521000  | -2.176441000 | 0.053392000  |
| H  | 4.542393000  | -2.161615000 | -0.605037000 |
| O  | 2.748934000  | -3.477178000 | -1.966388000 |
| H  | 2.031121000  | -3.506921000 | -2.607070000 |
| O  | 1.500776000  | -3.414868000 | 0.528111000  |
| H  | 2.038683000  | -4.052945000 | 1.007298000  |
| C  | -2.474433000 | 0.000477000  | -0.391182000 |
| C  | -3.321451000 | 1.122241000  | -0.183918000 |
| C  | -3.004055000 | -1.319179000 | -0.355892000 |
| C  | -4.677910000 | 0.900227000  | 0.056221000  |
| C  | -4.366152000 | -1.479148000 | -0.099456000 |
| C  | -5.203637000 | -0.386621000 | 0.104312000  |
| H  | -5.336728000 | 1.748442000  | 0.217392000  |
| H  | -4.783318000 | -2.480775000 | -0.057542000 |
| H  | -6.261488000 | -0.538049000 | 0.300975000  |
| C  | 2.825468000  | 4.179058000  | -1.620592000 |
| H  | 3.887297000  | 4.423101000  | -1.731844000 |
| H  | 2.444442000  | 3.887591000  | -2.606012000 |
| H  | 2.303537000  | 5.091989000  | -1.313546000 |
| C  | 3.169661000  | 3.496710000  | 0.776805000  |
| H  | 2.652061000  | 4.393933000  | 1.134042000  |

|   |              |              |              |
|---|--------------|--------------|--------------|
| H | 3.039521000  | 2.706423000  | 1.524437000  |
| H | 4.238146000  | 3.728739000  | 0.717901000  |
| C | 3.373005000  | 1.792703000  | -1.053182000 |
| H | 3.251780000  | 0.969854000  | -0.330321000 |
| H | 3.026608000  | 1.456111000  | -2.037950000 |
| H | 4.450895000  | 1.972702000  | -1.131165000 |
| C | -0.556512000 | -1.357841000 | 3.087670000  |
| H | -0.739141000 | -1.581529000 | 4.146101000  |
| H | -1.502296000 | -1.057252000 | 2.627821000  |
| H | -0.210438000 | -2.269712000 | 2.593192000  |
| C | -0.026868000 | 1.044833000  | 3.628197000  |
| H | -0.204909000 | 0.872093000  | 4.696408000  |
| H | 0.697560000  | 1.861880000  | 3.536986000  |
| H | -0.967366000 | 1.365248000  | 3.169910000  |
| C | 1.806893000  | -0.684536000 | 3.637457000  |
| H | 2.196302000  | -1.590879000 | 3.165793000  |
| H | 2.574709000  | 0.092060000  | 3.557922000  |
| H | 1.637187000  | -0.890161000 | 4.701613000  |
| C | -2.102553000 | -2.510825000 | -0.629399000 |
| H | -1.134633000 | -2.305350000 | -0.157622000 |
| C | -2.755508000 | 2.528280000  | -0.278473000 |
| H | -1.743767000 | 2.486445000  | 0.144404000  |
| C | -2.626195000 | 2.957883000  | -1.749259000 |
| H | -3.614068000 | 3.009672000  | -2.220442000 |
| H | -2.162637000 | 3.948622000  | -1.833169000 |
| H | -2.022869000 | 2.242047000  | -2.315662000 |
| C | -3.538180000 | 3.574056000  | 0.519782000  |
| H | -2.999917000 | 4.528291000  | 0.520160000  |
| H | -4.525399000 | 3.766166000  | 0.085040000  |
| H | -3.681710000 | 3.264699000  | 1.559900000  |
| C | -2.613303000 | -3.829196000 | -0.043583000 |
| H | -3.513972000 | -4.187327000 | -0.555815000 |
| H | -1.847074000 | -4.602945000 | -0.155839000 |
| H | -2.843375000 | -3.736234000 | 1.022707000  |
| C | -1.853314000 | -2.654757000 | -2.139878000 |
| H | -1.166708000 | -3.486124000 | -2.339208000 |
| H | -2.791718000 | -2.859367000 | -2.668225000 |
| H | -1.417736000 | -1.741097000 | -2.553680000 |
| W | 0.600072000  | 0.229410000  | -0.253219000 |

**8B''**

**E = -1210.9346485**

|    |              |              |              |
|----|--------------|--------------|--------------|
| N  | 1.030754000  | 0.035694000  | -0.705970000 |
| O  | -1.938695000 | -0.520910000 | -1.049246000 |
| Si | -3.230531000 | -1.410419000 | -0.528654000 |
| C  | -0.742520000 | 0.442794000  | 1.551248000  |
| C  | -0.580756000 | 0.120506000  | 2.996553000  |
| O  | -2.689938000 | -2.458158000 | 0.641523000  |
| H  | -3.407862000 | -2.882716000 | 1.121529000  |
| O  | -3.892968000 | -2.169779000 | -1.860126000 |
| H  | -3.227833000 | -2.455849000 | -2.494393000 |
| O  | -4.484919000 | -0.523748000 | 0.114202000  |
| H  | -5.140014000 | -0.289560000 | -0.550841000 |
| C  | 2.253531000  | -0.549442000 | -0.439506000 |
| C  | 2.377602000  | -1.965237000 | -0.480581000 |
| C  | 3.387752000  | 0.266297000  | -0.179592000 |

|   |              |              |              |
|---|--------------|--------------|--------------|
| C | 3.634758000  | -2.527212000 | -0.256538000 |
| C | 4.621785000  | -0.352005000 | 0.025384000  |
| C | 4.752741000  | -1.736347000 | -0.008825000 |
| H | 3.744688000  | -3.607350000 | -0.274425000 |
| H | 5.497933000  | 0.258230000  | 0.223784000  |
| H | 5.721793000  | -2.197792000 | 0.160562000  |
| C | 0.221949000  | -1.189560000 | 3.120935000  |
| H | 0.353825000  | -1.452516000 | 4.177774000  |
| H | -0.304006000 | -2.009432000 | 2.623663000  |
| H | 1.209041000  | -1.088479000 | 2.661040000  |
| C | -1.965291000 | -0.055092000 | 3.649193000  |
| H | -1.860799000 | -0.317433000 | 4.709298000  |
| H | -2.551311000 | 0.866912000  | 3.578992000  |
| H | -2.525121000 | -0.848029000 | 3.146316000  |
| C | 0.181245000  | 1.265176000  | 3.691192000  |
| H | 1.179434000  | 1.388546000  | 3.260182000  |
| H | -0.357784000 | 2.214188000  | 3.593497000  |
| H | 0.292683000  | 1.051751000  | 4.760952000  |
| C | 3.251335000  | 1.779084000  | -0.178205000 |
| H | 2.273118000  | 2.004589000  | 0.267044000  |
| C | 1.165842000  | -2.827170000 | -0.791446000 |
| H | 0.302429000  | -2.364856000 | -0.298012000 |
| C | 0.882510000  | -2.826089000 | -2.302722000 |
| H | 1.719980000  | -3.270615000 | -2.852764000 |
| H | -0.016805000 | -3.411652000 | -2.528177000 |
| H | 0.731165000  | -1.807776000 | -2.671341000 |
| C | 1.268974000  | -4.260383000 | -0.265093000 |
| H | 0.311367000  | -4.774026000 | -0.398958000 |
| H | 2.026256000  | -4.843922000 | -0.801665000 |
| H | 1.516604000  | -4.282228000 | 0.801024000  |
| C | 4.306810000  | 2.502564000  | 0.661967000  |
| H | 5.307521000  | 2.419775000  | 0.223358000  |
| H | 4.072521000  | 3.571068000  | 0.721988000  |
| H | 4.351898000  | 2.106999000  | 1.681588000  |
| C | 3.243789000  | 2.319735000  | -1.617487000 |
| H | 3.079338000  | 3.404385000  | -1.632259000 |
| H | 4.204336000  | 2.121007000  | -2.105934000 |
| H | 2.462283000  | 1.838693000  | -2.213899000 |
| C | -0.517594000 | 3.090713000  | -0.467029000 |
| H | -0.079990000 | 3.970341000  | 0.021049000  |
| H | 0.163396000  | 2.859311000  | -1.292850000 |
| C | -1.956215000 | 3.376926000  | -0.911474000 |
| H | -0.453577000 | 2.424656000  | 0.482804000  |
| C | -2.023352000 | 4.542753000  | -1.896522000 |
| H | -3.056011000 | 4.741116000  | -2.197412000 |
| H | -1.622663000 | 5.458765000  | -1.449195000 |
| H | -1.445306000 | 4.331867000  | -2.802539000 |
| H | -2.406377000 | 2.488723000  | -1.378910000 |
| H | -2.566134000 | 3.590446000  | -0.026829000 |
| W | -0.594934000 | 0.610291000  | -0.217333000 |

**8C**

**E = -1408.6994646**

|   |              |             |              |
|---|--------------|-------------|--------------|
| C | 0.646158000  | 2.117444000 | -0.648665000 |
| H | -0.078561000 | 2.261823000 | -1.464228000 |
| H | 0.195306000  | 2.617503000 | 0.224967000  |

|    |              |              |              |
|----|--------------|--------------|--------------|
| C  | 1.950352000  | 2.866531000  | -1.012037000 |
| N  | -1.322726000 | 0.081991000  | -0.135180000 |
| O  | 2.408398000  | -0.318080000 | -0.266406000 |
| Si | 3.829979000  | -0.931489000 | 0.269513000  |
| C  | 0.694637000  | -0.558758000 | 1.883066000  |
| H  | 0.734507000  | -1.661487000 | 1.821352000  |
| C  | -0.162798000 | -0.121354000 | 3.089972000  |
| O  | 4.460323000  | -0.173039000 | 1.614003000  |
| H  | 5.040409000  | 0.562414000  | 1.393247000  |
| O  | 5.011626000  | -0.766411000 | -0.899850000 |
| H  | 4.692847000  | -0.934408000 | -1.791832000 |
| O  | 3.542851000  | -2.512983000 | 0.705420000  |
| H  | 4.261951000  | -2.894452000 | 1.219223000  |
| C  | -2.697073000 | -0.045661000 | -0.242653000 |
| C  | -3.504302000 | 1.126406000  | -0.300684000 |
| C  | -3.314396000 | -1.329071000 | -0.308050000 |
| C  | -4.884396000 | 0.992687000  | -0.448663000 |
| C  | -4.701269000 | -1.397380000 | -0.453938000 |
| C  | -5.488844000 | -0.255857000 | -0.529418000 |
| H  | -5.498250000 | 1.887899000  | -0.503101000 |
| H  | -5.175524000 | -2.373750000 | -0.509061000 |
| H  | -6.565879000 | -0.338938000 | -0.645867000 |
| C  | 1.554375000  | 4.312512000  | -1.374020000 |
| H  | 2.442700000  | 4.908072000  | -1.616631000 |
| H  | 0.887341000  | 4.337142000  | -2.243326000 |
| H  | 1.039691000  | 4.804341000  | -0.540606000 |
| C  | 2.909232000  | 2.920690000  | 0.184117000  |
| H  | 2.443412000  | 3.434143000  | 1.033909000  |
| H  | 3.193611000  | 1.919059000  | 0.512581000  |
| H  | 3.820904000  | 3.472363000  | -0.074548000 |
| C  | 2.641980000  | 2.239688000  | -2.229787000 |
| H  | 2.991970000  | 1.229935000  | -2.004805000 |
| H  | 1.956612000  | 2.188711000  | -3.084955000 |
| H  | 3.505934000  | 2.841267000  | -2.535761000 |
| C  | -0.377450000 | 1.398712000  | 3.080498000  |
| H  | -0.890484000 | 1.726013000  | 3.992434000  |
| H  | 0.578981000  | 1.933036000  | 3.028000000  |
| H  | -0.990256000 | 1.701587000  | 2.225475000  |
| C  | 0.617913000  | -0.498159000 | 4.365096000  |
| H  | 0.050534000  | -0.226608000 | 5.263621000  |
| H  | 0.812346000  | -1.575979000 | 4.403395000  |
| H  | 1.583800000  | 0.017416000  | 4.406991000  |
| C  | -1.516340000 | -0.834547000 | 3.124599000  |
| H  | -2.114796000 | -0.606156000 | 2.240333000  |
| H  | -1.379109000 | -1.920685000 | 3.176496000  |
| H  | -2.090779000 | -0.531271000 | 4.008024000  |
| C  | -2.534950000 | -2.630294000 | -0.233442000 |
| H  | -1.488062000 | -2.377938000 | -0.037860000 |
| C  | -2.901826000 | 2.517362000  | -0.233545000 |
| H  | -1.847989000 | 2.400199000  | 0.026405000  |
| C  | -2.970892000 | 3.210994000  | -1.602213000 |
| H  | -4.010347000 | 3.364056000  | -1.913812000 |
| H  | -2.484414000 | 4.192084000  | -1.565938000 |
| H  | -2.479225000 | 2.613631000  | -2.376751000 |
| C  | -3.549149000 | 3.385657000  | 0.853918000  |
| H  | -3.030582000 | 4.347774000  | 0.929133000  |

|   |              |              |              |
|---|--------------|--------------|--------------|
| H | -4.600951000 | 3.599555000  | 0.635014000  |
| H | -3.505000000 | 2.898189000  | 1.832574000  |
| C | -3.018697000 | -3.530143000 | 0.913782000  |
| H | -4.038849000 | -3.889293000 | 0.739443000  |
| H | -2.373585000 | -4.411420000 | 1.001234000  |
| H | -3.009766000 | -3.003892000 | 1.871156000  |
| C | -2.605600000 | -3.396389000 | -1.563460000 |
| H | -1.998591000 | -4.307196000 | -1.519300000 |
| H | -3.635430000 | -3.696473000 | -1.787288000 |
| H | -2.250745000 | -2.789078000 | -2.400732000 |
| C | 0.433814000  | -1.273014000 | -1.848939000 |
| H | -0.563134000 | -1.285641000 | -2.300279000 |
| H | 1.084876000  | -0.670530000 | -2.510565000 |
| C | 0.987764000  | -2.693924000 | -1.739483000 |
| H | 1.955696000  | -2.690607000 | -1.231130000 |
| H | 0.322092000  | -3.297692000 | -1.109791000 |
| C | 1.128056000  | -3.372921000 | -3.105096000 |
| H | 0.166055000  | -3.428997000 | -3.626199000 |
| H | 1.819605000  | -2.819329000 | -3.751083000 |
| H | 1.513008000  | -4.393366000 | -3.001989000 |
| H | 1.729714000  | -0.244470000 | 2.082375000  |
| W | 0.452870000  | 0.038313000  | -0.158080000 |

## 8D

**E = -1211.0031792**

|    |              |              |              |
|----|--------------|--------------|--------------|
| N  | -1.100310000 | -0.003486000 | -0.226290000 |
| O  | 1.947284000  | 0.736597000  | -1.059386000 |
| Si | 3.409235000  | 1.463225000  | -0.764685000 |
| C  | 1.019065000  | -0.753938000 | 1.592620000  |
| H  | 2.123954000  | -0.880374000 | 1.534710000  |
| C  | 0.485927000  | -0.867380000 | 3.001803000  |
| O  | 3.326218000  | 2.881836000  | 0.088845000  |
| H  | 3.178279000  | 3.653975000  | -0.466045000 |
| O  | 4.114364000  | 1.841286000  | -2.222713000 |
| H  | 3.947825000  | 1.193196000  | -2.914197000 |
| O  | 4.261872000  | 0.374988000  | 0.156774000  |
| H  | 5.021996000  | 0.757187000  | 0.606272000  |
| C  | -2.373034000 | 0.531112000  | -0.277523000 |
| C  | -3.474428000 | -0.333467000 | -0.504230000 |
| C  | -2.565654000 | 1.924968000  | -0.087422000 |
| C  | -4.752494000 | 0.223842000  | -0.559261000 |
| C  | -3.866904000 | 2.424738000  | -0.146265000 |
| C  | -4.953825000 | 1.588998000  | -0.384418000 |
| H  | -5.607074000 | -0.422321000 | -0.737833000 |
| H  | -4.035857000 | 3.487812000  | -0.002334000 |
| H  | -5.958061000 | 2.001680000  | -0.428331000 |
| C  | -1.032936000 | -0.667040000 | 3.043621000  |
| H  | -1.402419000 | -0.770058000 | 4.070449000  |
| H  | -1.311226000 | 0.325420000  | 2.677190000  |
| H  | -1.543071000 | -1.405060000 | 2.417757000  |
| C  | 1.169097000  | 0.199563000  | 3.879885000  |
| H  | 0.814651000  | 0.131108000  | 4.915493000  |
| H  | 2.257119000  | 0.070697000  | 3.886644000  |
| H  | 0.951660000  | 1.206513000  | 3.509738000  |
| C  | 0.832804000  | -2.267402000 | 3.545583000  |
| H  | 0.355171000  | -3.048703000 | 2.945792000  |

|   |              |              |              |
|---|--------------|--------------|--------------|
| H | 1.914517000  | -2.442051000 | 3.531395000  |
| H | 0.488403000  | -2.373347000 | 4.581408000  |
| C | -1.382067000 | 2.848115000  | 0.137110000  |
| H | -0.591628000 | 2.249535000  | 0.608610000  |
| C | -3.251891000 | -1.817594000 | -0.728923000 |
| H | -2.306511000 | -2.071037000 | -0.236145000 |
| C | -4.346074000 | -2.699744000 | -0.119137000 |
| H | -5.305439000 | -2.585501000 | -0.636016000 |
| H | -4.064092000 | -3.755043000 | -0.199031000 |
| H | -4.504238000 | -2.470034000 | 0.939253000  |
| C | -3.083742000 | -2.112282000 | -2.228123000 |
| H | -2.870062000 | -3.174051000 | -2.395381000 |
| H | -3.997927000 | -1.860379000 | -2.777741000 |
| H | -2.263205000 | -1.528522000 | -2.656129000 |
| C | -0.842066000 | 3.362031000  | -1.207260000 |
| H | -1.598453000 | 3.968460000  | -1.718047000 |
| H | 0.046393000  | 3.985621000  | -1.056085000 |
| H | -0.568247000 | 2.536856000  | -1.871381000 |
| C | -1.679955000 | 4.015528000  | 1.083145000  |
| H | -0.755045000 | 4.554759000  | 1.313028000  |
| H | -2.371848000 | 4.740254000  | 0.639671000  |
| H | -2.113768000 | 3.668502000  | 2.026085000  |
| C | 0.742704000  | -2.321257000 | -1.069264000 |
| H | -0.113320000 | -2.933629000 | -0.762521000 |
| H | 0.618968000  | -2.154601000 | -2.156150000 |
| C | 2.048729000  | -3.081733000 | -0.806429000 |
| H | 2.103742000  | -3.328124000 | 0.260997000  |
| H | 2.918113000  | -2.441219000 | -1.011575000 |
| C | 2.172739000  | -4.361710000 | -1.636655000 |
| H | 3.106210000  | -4.892392000 | -1.418515000 |
| H | 1.341872000  | -5.045277000 | -1.428390000 |
| H | 2.157164000  | -4.141404000 | -2.710255000 |
| W | 0.615060000  | -0.364310000 | -0.209109000 |

**TS(8A-8B')**

**E = -1289.5338305**

|    |              |              |              |
|----|--------------|--------------|--------------|
| C  | 0.896781000  | 2.607212000  | -0.165235000 |
| H  | 0.013549000  | 2.803876000  | -0.782551000 |
| H  | 0.800164000  | 3.314980000  | 0.671399000  |
| C  | 2.214049000  | 2.928136000  | -0.912886000 |
| N  | -1.157034000 | 0.061576000  | -0.633690000 |
| O  | 1.677157000  | -1.046793000 | -0.988873000 |
| Si | 2.789418000  | -2.182502000 | -0.540835000 |
| C  | 0.671684000  | 0.187278000  | 1.650356000  |
| H  | 0.865601000  | 1.718409000  | 0.882307000  |
| C  | 0.472093000  | 0.065374000  | 3.120905000  |
| O  | 4.202367000  | -1.564842000 | 0.087523000  |
| H  | 4.872324000  | -1.424325000 | -0.589079000 |
| O  | 3.258219000  | -3.013595000 | -1.909404000 |
| H  | 2.532770000  | -3.158454000 | -2.525321000 |
| O  | 2.089982000  | -3.138889000 | 0.622697000  |
| H  | 2.725814000  | -3.701419000 | 1.075863000  |
| C  | -2.481072000 | -0.272861000 | -0.423330000 |
| C  | -3.449541000 | 0.751199000  | -0.242995000 |
| C  | -2.871990000 | -1.639825000 | -0.441331000 |
| C  | -4.787939000 | 0.385554000  | -0.093449000 |

|   |              |              |              |
|---|--------------|--------------|--------------|
| C | -4.223521000 | -1.945376000 | -0.278248000 |
| C | -5.179989000 | -0.948896000 | -0.108868000 |
| H | -5.539550000 | 1.157197000  | 0.043787000  |
| H | -4.537812000 | -2.984740000 | -0.282994000 |
| H | -6.227079000 | -1.211989000 | 0.013997000  |
| C | 2.273812000  | 4.451410000  | -1.116543000 |
| H | 3.186937000  | 4.734299000  | -1.651994000 |
| H | 1.418405000  | 4.808792000  | -1.700567000 |
| H | 2.272555000  | 4.980076000  | -0.156773000 |
| C | 3.422100000  | 2.478411000  | -0.077811000 |
| H | 3.418898000  | 2.952261000  | 0.910441000  |
| H | 3.435808000  | 1.392877000  | 0.075549000  |
| H | 4.357732000  | 2.755219000  | -0.576336000 |
| C | 2.245715000  | 2.246998000  | -2.290170000 |
| H | 2.274250000  | 1.152462000  | -2.217075000 |
| H | 1.372653000  | 2.526085000  | -2.891048000 |
| H | 3.141518000  | 2.548847000  | -2.844019000 |
| C | -0.107910000 | -1.340053000 | 3.381793000  |
| H | -0.240218000 | -1.492355000 | 4.459542000  |
| H | -1.079329000 | -1.456553000 | 2.892864000  |
| H | 0.562160000  | -2.114315000 | 2.998342000  |
| C | -0.517495000 | 1.134065000  | 3.621570000  |
| H | -0.674906000 | 1.031867000  | 4.701915000  |
| H | -0.136404000 | 2.145171000  | 3.437320000  |
| H | -1.484467000 | 1.034919000  | 3.120183000  |
| C | 1.818990000  | 0.212698000  | 3.854843000  |
| H | 2.534710000  | -0.536909000 | 3.505813000  |
| H | 2.255986000  | 1.202088000  | 3.682277000  |
| H | 1.682210000  | 0.087850000  | 4.935829000  |
| C | -1.835748000 | -2.726965000 | -0.668718000 |
| H | -0.923513000 | -2.423576000 | -0.140739000 |
| C | -3.024861000 | 2.209160000  | -0.263044000 |
| H | -2.051727000 | 2.258376000  | 0.242013000  |
| C | -2.822179000 | 2.691570000  | -1.708943000 |
| H | -3.768497000 | 2.656959000  | -2.260263000 |
| H | -2.459546000 | 3.726723000  | -1.731918000 |
| H | -2.104131000 | 2.057552000  | -2.237983000 |
| C | -3.972418000 | 3.148605000  | 0.487304000  |
| H | -3.536901000 | 4.152010000  | 0.546345000  |
| H | -4.937944000 | 3.249347000  | -0.021002000 |
| H | -4.163009000 | 2.801274000  | 1.507785000  |
| C | -2.236114000 | -4.096864000 | -0.115577000 |
| H | -3.065611000 | -4.542360000 | -0.676989000 |
| H | -1.389669000 | -4.787416000 | -0.188609000 |
| H | -2.532617000 | -4.038059000 | 0.936695000  |
| C | -1.487887000 | -2.830404000 | -2.162815000 |
| H | -0.704970000 | -3.580742000 | -2.325737000 |
| H | -2.367991000 | -3.130856000 | -2.742979000 |
| H | -1.133035000 | -1.871388000 | -2.550275000 |
| W | 0.546772000  | 0.287356000  | -0.139390000 |

**TS(8A-8C)**

**E = -1408.6378443**

|   |              |              |              |
|---|--------------|--------------|--------------|
| C | -0.299066000 | -1.703237000 | -1.357650000 |
| H | 0.370602000  | -1.363245000 | -2.167964000 |
| H | 0.341976000  | -2.371448000 | -0.758782000 |

|    |              |              |              |
|----|--------------|--------------|--------------|
| C  | -1.402660000 | -2.575602000 | -1.995596000 |
| N  | 1.299348000  | 0.108561000  | 0.001535000  |
| O  | -2.304311000 | 0.323380000  | -0.736257000 |
| Si | -3.881239000 | 0.603849000  | -0.409333000 |
| C  | -0.968419000 | -0.263010000 | 1.862212000  |
| H  | -0.928429000 | 1.184308000  | 1.342589000  |
| C  | -0.421496000 | -0.398373000 | 3.272312000  |
| O  | -4.534184000 | -0.428759000 | 0.730950000  |
| H  | -4.857818000 | -1.252581000 | 0.352543000  |
| O  | -4.822267000 | 0.409934000  | -1.773204000 |
| H  | -4.388454000 | 0.699795000  | -2.581652000 |
| O  | -4.014274000 | 2.131510000  | 0.249324000  |
| H  | -4.889704000 | 2.302254000  | 0.611737000  |
| C  | 2.646591000  | 0.139487000  | -0.310721000 |
| C  | 3.499853000  | -0.894849000 | 0.166925000  |
| C  | 3.176071000  | 1.175933000  | -1.133722000 |
| C  | 4.857121000  | -0.844205000 | -0.158441000 |
| C  | 4.539019000  | 1.170731000  | -1.424596000 |
| C  | 5.382426000  | 0.176630000  | -0.938658000 |
| H  | 5.514543000  | -1.630664000 | 0.202455000  |
| H  | 4.952070000  | 1.958728000  | -2.046493000 |
| H  | 6.442441000  | 0.194834000  | -1.176523000 |
| C  | -0.736957000 | -3.815275000 | -2.625176000 |
| H  | -1.478216000 | -4.458149000 | -3.116730000 |
| H  | 0.003553000  | -3.522449000 | -3.378754000 |
| H  | -0.221877000 | -4.417267000 | -1.867448000 |
| C  | -2.403156000 | -3.059823000 | -0.937237000 |
| H  | -1.893299000 | -3.629742000 | -0.150933000 |
| H  | -2.909023000 | -2.216699000 | -0.460619000 |
| H  | -3.164253000 | -3.713756000 | -1.381196000 |
| C  | -2.132172000 | -1.816464000 | -3.112305000 |
| H  | -2.621269000 | -0.923981000 | -2.720339000 |
| H  | -1.425224000 | -1.506353000 | -3.891691000 |
| H  | -2.891549000 | -2.450159000 | -3.586662000 |
| C  | -0.402931000 | -1.903707000 | 3.605558000  |
| H  | -0.082695000 | -2.054620000 | 4.642964000  |
| H  | -1.396813000 | -2.349605000 | 3.491099000  |
| H  | 0.288028000  | -2.442262000 | 2.950870000  |
| C  | -1.380220000 | 0.316336000  | 4.245212000  |
| H  | -1.025449000 | 0.209860000  | 5.276625000  |
| H  | -1.445944000 | 1.386853000  | 4.022240000  |
| H  | -2.390933000 | -0.102287000 | 4.189642000  |
| C  | 0.984341000  | 0.187079000  | 3.427696000  |
| H  | 1.679211000  | -0.248092000 | 2.708246000  |
| H  | 0.982175000  | 1.270207000  | 3.273766000  |
| H  | 1.361955000  | -0.007274000 | 4.437621000  |
| C  | 2.270068000  | 2.233237000  | -1.736315000 |
| H  | 1.443254000  | 2.376703000  | -1.036494000 |
| C  | 2.985541000  | -2.078232000 | 0.968374000  |
| H  | 1.931113000  | -1.889890000 | 1.193000000  |
| C  | 3.059633000  | -3.370483000 | 0.139188000  |
| H  | 4.097306000  | -3.623015000 | -0.106478000 |
| H  | 2.635905000  | -4.211649000 | 0.699444000  |
| H  | 2.508820000  | -3.273721000 | -0.800519000 |
| C  | 3.735114000  | -2.255129000 | 2.296817000  |
| H  | 3.278770000  | -3.057271000 | 2.887083000  |



|   |              |              |              |
|---|--------------|--------------|--------------|
| H | 4.783396000  | -2.527961000 | 2.133729000  |
| H | 3.720954000  | -1.341068000 | 2.897403000  |
| C | 2.943905000  | 3.595841000  | -1.926833000 |
| H | 3.704821000  | 3.573508000  | -2.714625000 |
| H | 2.199615000  | 4.340919000  | -2.226707000 |
| H | 3.420605000  | 3.943609000  | -1.005155000 |
| C | 1.674961000  | 1.737918000  | -3.065387000 |
| H | 0.978918000  | 2.476309000  | -3.479865000 |
| H | 2.467233000  | 1.569169000  | -3.803180000 |
| H | 1.135626000  | 0.794156000  | -2.938626000 |
| C | -0.772002000 | 2.354222000  | 0.372643000  |
| H | -0.569526000 | 2.540707000  | -0.691225000 |
| H | -1.821691000 | 2.626729000  | 0.512303000  |
| C | 0.153386000  | 3.210342000  | 1.235685000  |
| H | -0.116730000 | 3.088643000  | 2.293877000  |
| H | 1.188190000  | 2.857632000  | 1.149173000  |
| C | 0.078011000  | 4.694592000  | 0.874923000  |
| H | 0.386254000  | 4.865419000  | -0.162509000 |
| H | -0.944198000 | 5.073454000  | 0.981609000  |
| H | 0.728963000  | 5.295349000  | 1.519410000  |
| H | -2.056089000 | -0.455216000 | 1.840783000  |
| W | -0.470091000 | 0.021962000  | 0.001688000  |

**TS(8A-8D)**

**E = -1408.6276461**

|    |              |              |              |
|----|--------------|--------------|--------------|
| C  | 0.102591000  | 2.317234000  | -1.109272000 |
| H  | -0.486909000 | 2.183503000  | -2.027299000 |
| H  | -0.616530000 | 2.385044000  | -0.286817000 |
| C  | 0.856401000  | 3.672804000  | -1.175472000 |
| N  | -1.181835000 | -0.271034000 | -0.128481000 |
| O  | 1.441102000  | -1.598344000 | -0.281801000 |
| Si | 2.247656000  | -2.535640000 | 0.793430000  |
| C  | 0.958534000  | 0.719218000  | 1.583727000  |
| H  | 2.051409000  | 0.906525000  | 1.455765000  |
| C  | 0.491789000  | 0.850079000  | 3.018125000  |
| O  | 3.617223000  | -1.841755000 | 1.453090000  |
| H  | 4.408303000  | -2.059634000 | 0.949676000  |
| O  | 2.815502000  | -3.894559000 | 0.000812000  |
| H  | 2.208619000  | -4.208526000 | -0.676633000 |
| O  | 1.226733000  | -2.900801000 | 2.058237000  |
| H  | 1.676348000  | -3.355186000 | 2.777796000  |
| C  | -2.482192000 | -0.701840000 | -0.340088000 |
| C  | -3.572660000 | 0.152174000  | -0.031147000 |
| C  | -2.714518000 | -2.005716000 | -0.857576000 |
| C  | -4.869025000 | -0.312443000 | -0.264598000 |
| C  | -4.030500000 | -2.415153000 | -1.066642000 |
| C  | -5.106233000 | -1.580938000 | -0.777666000 |
| H  | -5.710432000 | 0.337391000  | -0.038383000 |
| H  | -4.219923000 | -3.408717000 | -1.462079000 |
| H  | -6.123833000 | -1.921225000 | -0.948765000 |
| C  | 1.692333000  | 3.805564000  | -2.458210000 |
| H  | 2.091079000  | 4.822616000  | -2.544469000 |
| H  | 2.547264000  | 3.123283000  | -2.469622000 |
| H  | 1.087087000  | 3.611066000  | -3.351496000 |
| C  | -0.206122000 | 4.787635000  | -1.185430000 |
| H  | -0.882268000 | 4.684870000  | -2.041579000 |

|   |              |              |              |
|---|--------------|--------------|--------------|
| H | -0.812914000 | 4.764890000  | -0.273535000 |
| H | 0.266361000  | 5.775137000  | -1.249035000 |
| C | 1.762917000  | 3.867477000  | 0.043717000  |
| H | 1.193346000  | 3.802524000  | 0.975203000  |
| H | 2.551536000  | 3.108681000  | 0.082718000  |
| H | 2.247044000  | 4.850377000  | 0.009068000  |
| C | -0.786717000 | 0.032771000  | 3.244605000  |
| H | -1.121081000 | 0.135673000  | 4.283831000  |
| H | -1.592840000 | 0.369453000  | 2.588871000  |
| H | -0.605304000 | -1.024938000 | 3.035526000  |
| C | 0.227110000  | 2.332156000  | 3.344989000  |
| H | -0.100067000 | 2.437028000  | 4.386427000  |
| H | 1.130866000  | 2.937543000  | 3.216546000  |
| H | -0.556206000 | 2.743967000  | 2.700562000  |
| C | 1.597286000  | 0.318455000  | 3.950218000  |
| H | 1.814796000  | -0.729315000 | 3.727616000  |
| H | 2.524967000  | 0.890582000  | 3.835863000  |
| H | 1.281557000  | 0.393086000  | 4.997566000  |
| C | -1.551645000 | -2.911461000 | -1.217996000 |
| H | -0.703699000 | -2.612534000 | -0.595486000 |
| C | -3.373813000 | 1.555395000  | 0.513161000  |
| H | -2.311249000 | 1.660230000  | 0.756562000  |
| C | -3.725983000 | 2.609783000  | -0.547090000 |
| H | -4.784919000 | 2.549266000  | -0.822281000 |
| H | -3.537083000 | 3.620899000  | -0.169350000 |
| H | -3.137774000 | 2.470830000  | -1.459019000 |
| C | -4.167215000 | 1.801377000  | 1.804089000  |
| H | -3.928823000 | 2.788838000  | 2.214462000  |
| H | -5.247917000 | 1.775120000  | 1.627273000  |
| H | -3.935929000 | 1.051238000  | 2.565869000  |
| C | -1.821032000 | -4.394323000 | -0.942774000 |
| H | -2.582763000 | -4.811486000 | -1.611030000 |
| H | -0.907120000 | -4.977445000 | -1.101599000 |
| H | -2.147753000 | -4.556593000 | 0.088816000  |
| C | -1.147117000 | -2.694745000 | -2.685535000 |
| H | -0.268975000 | -3.297606000 | -2.943922000 |
| H | -1.962856000 | -2.977719000 | -3.360622000 |
| H | -0.903773000 | -1.645345000 | -2.881430000 |
| C | 2.055172000  | 0.416879000  | -2.028866000 |
| H | 1.773513000  | -0.588447000 | -2.363362000 |
| H | 1.128047000  | 1.374401000  | -1.456842000 |
| C | 3.510310000  | 0.447686000  | -1.556939000 |
| H | 3.631544000  | -0.201132000 | -0.682312000 |
| H | 3.771522000  | 1.462067000  | -1.225432000 |
| C | 4.495695000  | 0.010073000  | -2.643260000 |
| H | 5.531073000  | 0.055103000  | -2.287212000 |
| H | 4.294288000  | -1.018606000 | -2.961857000 |
| H | 4.419276000  | 0.651104000  | -3.528832000 |
| H | 1.939820000  | 1.059762000  | -2.912295000 |
| W | 0.519571000  | 0.159613000  | -0.165935000 |

**TS(8B''-8D)**

**E = -1210.9305481**

|    |              |             |              |
|----|--------------|-------------|--------------|
| N  | -1.040667000 | 0.067901000 | -0.686801000 |
| O  | 1.963703000  | 0.631340000 | -1.040649000 |
| Si | 3.272517000  | 1.489881000 | -0.511315000 |

|   |              |              |              |
|---|--------------|--------------|--------------|
| C | 0.751669000  | -0.642394000 | 1.512665000  |
| C | 0.586728000  | -0.642856000 | 2.991877000  |
| O | 2.745963000  | 2.499430000  | 0.697937000  |
| H | 3.468601000  | 2.903966000  | 1.188056000  |
| O | 3.930753000  | 2.284794000  | -1.822440000 |
| H | 3.263868000  | 2.605354000  | -2.438144000 |
| O | 4.518816000  | 0.572978000  | 0.101589000  |
| H | 5.153505000  | 0.317900000  | -0.575381000 |
| C | -2.279452000 | 0.598695000  | -0.380321000 |
| C | -2.424520000 | 2.005903000  | -0.241638000 |
| C | -3.404404000 | -0.259616000 | -0.252292000 |
| C | -3.693230000 | 2.517268000  | 0.033091000  |
| C | -4.650213000 | 0.309913000  | 0.013905000  |
| C | -4.801409000 | 1.685036000  | 0.160089000  |
| H | -3.820146000 | 3.589196000  | 0.151496000  |
| H | -5.519316000 | -0.332946000 | 0.116682000  |
| H | -5.779617000 | 2.107138000  | 0.373773000  |
| C | 0.385471000  | 0.826216000  | 3.418236000  |
| H | 0.298437000  | 0.887081000  | 4.509486000  |
| H | 1.229513000  | 1.443482000  | 3.098711000  |
| H | -0.525174000 | 1.237759000  | 2.973469000  |
| C | 1.850535000  | -1.209622000 | 3.667125000  |
| H | 1.746956000  | -1.181930000 | 4.758548000  |
| H | 2.021770000  | -2.250538000 | 3.371598000  |
| H | 2.734192000  | -0.629845000 | 3.385984000  |
| C | -0.645162000 | -1.472403000 | 3.398856000  |
| H | -1.550944000 | -1.076064000 | 2.931227000  |
| H | -0.533634000 | -2.520454000 | 3.097816000  |
| H | -0.778026000 | -1.452366000 | 4.487096000  |
| C | -3.243121000 | -1.756718000 | -0.452011000 |
| H | -2.277838000 | -2.030551000 | -0.007234000 |
| C | -1.223689000 | 2.917521000  | -0.429185000 |
| H | -0.355889000 | 2.410154000  | 0.009582000  |
| C | -0.929877000 | 3.111638000  | -1.925885000 |
| H | -1.768413000 | 3.614544000  | -2.421179000 |
| H | -0.034991000 | 3.729301000  | -2.066325000 |
| H | -0.766712000 | 2.150067000  | -2.420446000 |
| C | -1.350258000 | 4.271879000  | 0.272471000  |
| H | -0.399634000 | 4.811032000  | 0.208102000  |
| H | -2.114076000 | 4.906990000  | -0.191157000 |
| H | -1.601995000 | 4.157852000  | 1.331854000  |
| C | -4.316754000 | -2.601231000 | 0.238675000  |
| H | -5.300925000 | -2.473634000 | -0.225979000 |
| H | -4.064038000 | -3.664437000 | 0.163354000  |
| H | -4.409465000 | -2.349349000 | 1.299982000  |
| C | -3.173345000 | -2.093760000 | -1.950580000 |
| H | -3.000225000 | -3.165836000 | -2.106041000 |
| H | -4.114751000 | -1.831669000 | -2.446307000 |
| H | -2.370544000 | -1.535135000 | -2.441470000 |
| C | 0.563761000  | -2.810372000 | -0.605426000 |
| H | 0.358400000  | -3.637046000 | 0.089375000  |
| H | -0.277959000 | -2.823720000 | -1.305034000 |
| C | 1.916093000  | -3.065843000 | -1.290013000 |
| H | 0.566323000  | -2.092371000 | 0.566986000  |
| C | 2.018832000  | -4.486332000 | -1.850267000 |
| H | 2.984296000  | -4.645453000 | -2.340396000 |

|   |             |              |              |
|---|-------------|--------------|--------------|
| H | 1.920505000 | -5.230706000 | -1.052765000 |
| H | 1.232315000 | -4.678386000 | -2.587608000 |
| H | 2.072031000 | -2.347572000 | -2.106365000 |
| H | 2.728334000 | -2.895575000 | -0.571895000 |
| W | 0.596688000 | -0.520077000 | -0.274475000 |

**TS(8C-8D)**

**E = -1408.6360630**

|    |              |              |              |
|----|--------------|--------------|--------------|
| C  | 0.962278000  | 2.162255000  | 0.430785000  |
| H  | 0.632871000  | 2.455487000  | -0.574705000 |
| H  | 0.196577000  | 2.553288000  | 1.110560000  |
| C  | 2.318908000  | 2.873122000  | 0.692443000  |
| N  | -1.371956000 | 0.245048000  | -0.059207000 |
| O  | 2.229104000  | -0.160029000 | -0.809688000 |
| Si | 3.591705000  | -1.018034000 | -1.100121000 |
| C  | 0.809185000  | -0.595574000 | 1.713480000  |
| H  | 1.835865000  | -0.995974000 | 1.685056000  |
| C  | 0.186306000  | -0.735046000 | 3.092534000  |
| O  | 4.968581000  | -0.093994000 | -1.252127000 |
| H  | 5.139488000  | 0.165775000  | -2.162909000 |
| O  | 3.512331000  | -1.871207000 | -2.532239000 |
| H  | 2.642819000  | -2.248268000 | -2.701482000 |
| O  | 3.813307000  | -1.975439000 | 0.250774000  |
| H  | 4.693819000  | -2.361966000 | 0.292949000  |
| C  | -2.722724000 | 0.427034000  | -0.298375000 |
| C  | -3.195491000 | 1.655803000  | -0.842939000 |
| C  | -3.639063000 | -0.622688000 | -0.012306000 |
| C  | -4.561514000 | 1.809803000  | -1.068387000 |
| C  | -4.997185000 | -0.409362000 | -0.262633000 |
| C  | -5.464377000 | 0.790406000  | -0.780158000 |
| H  | -4.930568000 | 2.744831000  | -1.477875000 |
| H  | -5.702549000 | -1.207910000 | -0.047538000 |
| H  | -6.525990000 | 0.932733000  | -0.962481000 |
| C  | 1.986639000  | 4.315529000  | 1.120604000  |
| H  | 2.904439000  | 4.894990000  | 1.274695000  |
| H  | 1.392931000  | 4.829118000  | 0.355499000  |
| H  | 1.417322000  | 4.335123000  | 2.057395000  |
| C  | 3.129937000  | 2.201645000  | 1.806333000  |
| H  | 2.571524000  | 2.180509000  | 2.749475000  |
| H  | 3.399518000  | 1.175743000  | 1.538073000  |
| H  | 4.059508000  | 2.751730000  | 1.990478000  |
| C  | 3.165124000  | 2.935678000  | -0.586749000 |
| H  | 3.465366000  | 1.940923000  | -0.915949000 |
| H  | 2.609930000  | 3.421058000  | -1.398813000 |
| H  | 4.073373000  | 3.523404000  | -0.409719000 |
| C  | -1.065625000 | 0.129236000  | 3.267975000  |
| H  | -1.504801000 | -0.038769000 | 4.257665000  |
| H  | -0.821798000 | 1.194384000  | 3.188651000  |
| H  | -1.818493000 | -0.095060000 | 2.510295000  |
| C  | 1.222757000  | -0.347017000 | 4.164831000  |
| H  | 0.809434000  | -0.511589000 | 5.166400000  |
| H  | 2.135808000  | -0.945100000 | 4.073426000  |
| H  | 1.500988000  | 0.708537000  | 4.089029000  |
| C  | -0.164325000 | -2.226167000 | 3.271364000  |
| H  | -0.914288000 | -2.544664000 | 2.543056000  |
| H  | 0.721128000  | -2.858550000 | 3.145954000  |

|   |              |              |              |
|---|--------------|--------------|--------------|
| H | -0.564002000 | -2.399413000 | 4.277295000  |
| C | -3.200937000 | -1.973685000 | 0.525548000  |
| H | -2.121093000 | -1.923750000 | 0.694804000  |
| C | -2.219470000 | 2.754782000  | -1.217530000 |
| H | -1.408390000 | 2.716287000  | -0.485393000 |
| C | -1.614243000 | 2.480194000  | -2.604628000 |
| H | -2.390740000 | 2.519949000  | -3.376683000 |
| H | -0.851656000 | 3.226599000  | -2.855404000 |
| H | -1.153336000 | 1.488106000  | -2.653400000 |
| C | -2.809255000 | 4.166709000  | -1.160059000 |
| H | -2.014821000 | 4.907385000  | -1.299087000 |
| H | -3.547488000 | 4.339577000  | -1.950989000 |
| H | -3.291029000 | 4.364247000  | -0.197252000 |
| C | -3.881057000 | -2.308478000 | 1.861116000  |
| H | -4.964811000 | -2.416202000 | 1.742960000  |
| H | -3.500574000 | -3.256414000 | 2.257599000  |
| H | -3.705641000 | -1.532027000 | 2.611187000  |
| C | -3.459680000 | -3.088742000 | -0.499262000 |
| H | -3.087682000 | -4.048852000 | -0.124807000 |
| H | -4.530738000 | -3.203584000 | -0.700343000 |
| H | -2.963547000 | -2.878767000 | -1.450962000 |
| C | 0.040474000  | -1.630580000 | -1.647985000 |
| H | -1.008168000 | -1.631187000 | -1.971566000 |
| H | 0.627417000  | -1.314602000 | -2.527092000 |
| C | 0.430627000  | -3.066198000 | -1.257674000 |
| H | 1.459966000  | -3.104781000 | -0.875515000 |
| H | -0.195960000 | -3.394709000 | -0.418668000 |
| C | 0.282853000  | -4.072375000 | -2.403206000 |
| H | -0.747839000 | -4.096320000 | -2.773627000 |
| H | 0.921910000  | -3.811621000 | -3.256866000 |
| H | 0.551944000  | -5.087105000 | -2.088696000 |
| H | 1.059095000  | 0.883554000  | 1.285854000  |
| W | 0.369396000  | -0.091370000 | -0.114985000 |
